# Supplementary material for: Photo-Induced FeCl3-catalysed direct denitrative chlorination of (hetero)nitroarenes at room temperature
Source: Royal Society of Chemistry journal article supplement (doi:10.1039/d4gc04210g), 2024-01-01

# **Photo-Induced FeCl<sub>3</sub>-catalysed direct denitrative chlorination of (hetero)nitroarenes at room temperature**

Mingjing Deng<sup>[a]</sup>, Ke Liu<sup>[a]</sup>, Zhaolun Ma<sup>[a]</sup>, Guanzhong Luo<sup>[a]</sup> and Longyang Dian<sup>\*[a,b]</sup>

[a] State Key Laboratory of Microbial Technology, Institute of Microbial Technology, Shandong University, No. 72 Binhai Avenue, Qingdao 266237 (P. R. China),

Corresponding author: Longyang Dian, email: longyang\_dian@sdu.edu.cn.

[b] Longyang Dian Suzhou Institute of Shandong University

No. 388 Ruoshui Road, Suzhou Industrial Park, Suzhou 215123 (P. R. China)

Corresponding author: Longyang Dian, email: longyang\_dian@sdu.edu.cn.

## Content of the supporting information

|                                                                                            |    |
|--------------------------------------------------------------------------------------------|----|
| 1. General Information .....                                                               | 3  |
| 2. Light Source Test Report.....                                                           | 4  |
| 3. Experimental Section .....                                                              | 5  |
| 3.1 Control Experiment to Explore the Mechanism.....                                       | 5  |
| 3.2 UV-Vis Spectroscopy .....                                                              | 7  |
| 3.3 Light On/Off Experiments .....                                                         | 8  |
| 3.4 Detailed optimization of the reaction conditions <sup>a</sup> .....                    | 9  |
| 3.5 General Procedure for the Photoinduced FeCl <sub>3</sub> -Catalyzed Chlorination. .... | 10 |
| 3.6 NMR Data. ....                                                                         | 10 |
| 3.7 Gram-Scale of the denitrative chlorination reaction. ....                              | 28 |
| 4. References.....                                                                         | 28 |
| 5. <sup>1</sup> H NMR and <sup>13</sup> C NMR Spectra of the Products. ....                | 31 |

## 1. General Information

<sup>1</sup>H NMR spectra were recorded on 600 MHz or 400 MHz spectrometers. The chemical shifts were reported in parts per million ( $\delta$ ) relative to internal standard TMS (0 ppm) for CDCl<sub>3</sub>. The peak patterns are indicated as follows: s, singlet; d, doublet; dd, doublet of doublet; t, triplet; m, multiplet; q, quartet. The coupling constants, *J*, are reported in Hertz (Hz). <sup>13</sup>C NMR spectra were obtained at 151 MHz or 101 MHz spectrometers and referenced to the internal solvent signals (central peak is 77.0 ppm in CDCl<sub>3</sub>). CDCl<sub>3</sub> or d<sub>6</sub>-DMSO was used as the NMR solvent. High resolution mass spectrometry (HRMS) was obtained on a Q-TOF micro spectroMeter. The UV-Vis Spectroscopy was measured with Yoke UV-Vis Spectrophotometer with Holographic Blazed Grating C-T Monochromator. Melting points were determined with a MicroMelting point apparatus without corrections. Organic solutions were concentrated by rotary evaporation below 30 °C in vacuum. 4A MS was activated by heating at 200 degrees in a muffle furnace for 20 hours.

All the reagents and solvents were purchased as reagent grade and were used without further purification unless otherwise stated. Flash column chromatography was performed over silica gel 200-300 m and the eluent was a mixture of diethyl ether (Et<sub>2</sub>O) and n-petane.

## 2. Light Source Test Report

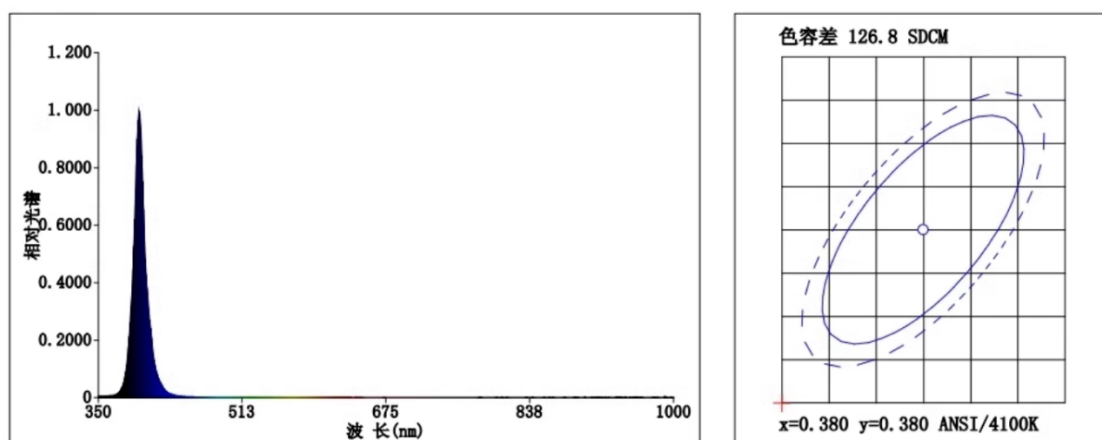

|                                                      |                               |                                         |                                   |                 |                               |
|------------------------------------------------------|-------------------------------|-----------------------------------------|-----------------------------------|-----------------|-------------------------------|
| Chromaticity coordinates                             | X=0.1846                      | $y=0.0454/u'=0.2325$                    | $V'=0.1287$                       | Duv=-1.875e-001 |                               |
| Correlated color temperature                         | Tc=100000 K                   | dominant wavelength                     | $\lambda_d=436.9$ nm              | color purity    | Purity =88.9 %                |
| color ratio                                          | R=10.3%<br>G=69.8%<br>B=19.9% | peak wavelength                         | $\lambda_p=396.2$ nm              | half width      | $\Delta\lambda_d=1$<br>3.1 nm |
| Color rendering index: Ra = 34.5                     |                               |                                         |                                   |                 |                               |
| R1 = 79.33                                           | R2 = 37.93                    | R3 = -5.46                              | R4 = 10.42                        | R5 = 69.36      |                               |
| R6 = 24.07                                           | R7 = 25.89                    | R8 = 34.56                              | R9 = 39.27                        | R10 = -44.01    |                               |
| R11 = 26.79                                          | R12 = -86.57                  | R13 = 46.96                             | R14 = 45.93                       | R15 = 54.68     |                               |
| TM30 parameters: Rf = 0.0, Rg: -70.4                 |                               |                                         |                                   |                 |                               |
| Photometric parameters:                              |                               |                                         |                                   |                 |                               |
| Luminous flux                                        | $\Phi=0.8903$ Lm              | light micro 0.88 Lm/W<br>206.0 mW       | Photovoltaic efficiency = 20.387% |                 |                               |
| light quantum=6.914e-001 umol/s                      |                               | Fluorescence blue light ratio = 0.00965 | Fluorescent efficacy= 1.891e-003  |                 |                               |
| Electrical parameters                                |                               |                                         |                                   |                 |                               |
| Forward Voltage: VF = 6.738 V                        |                               | Forward current: IF =<br>149.9 mA       | Power P = 1011 mW                 |                 |                               |
| Reverse current IR=0 uA (reverse voltage VR=5.003 V) |                               |                                         |                                   |                 |                               |
| Grading: **[out]                                     |                               |                                         | White light classification: OUT   |                 |                               |

Figure S1. LED Spectral Test Report

### 3. Experimental Section

#### 3.1 Control Experiment to Explore the Mechanism.

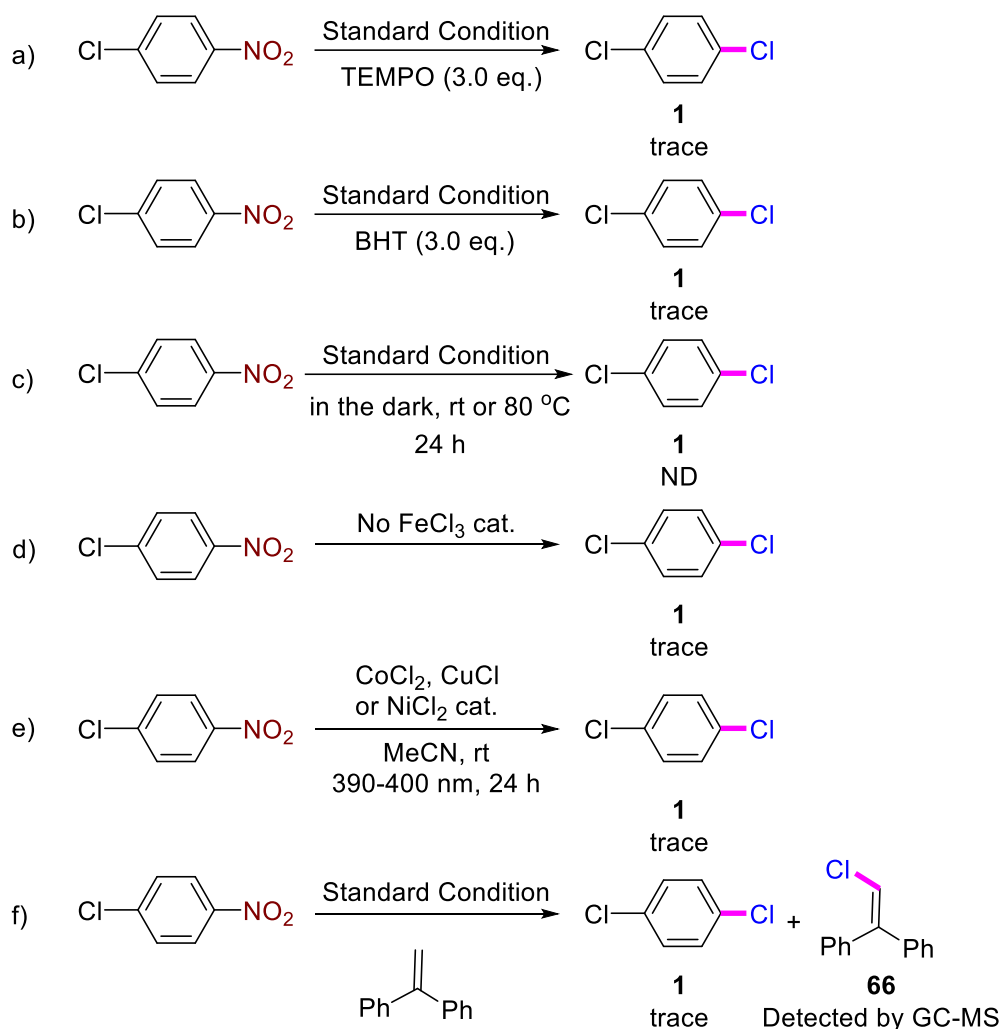

**Scheme S1.** Control experiments to explore the possible mechanism. Conditions: The reaction was performed with standard condition unless otherwise noted. Substrate (0.1 mmol), cat. (10 mol%, 0.01 mmol), MgCl<sub>2</sub> (0.2 mmol), 4A MS (20 mg) in MeCN (1 mL, 0.1 M) under 390-400 nm light irradiation. f: Substrate (0.1 mmol), 1,1-Diphenylethylene (0.2 mol, 2 equiv.), MgCl<sub>2</sub> (19 mg, 0.2 mmol, 2 equiv.), 4A MS (20 mg) was dissolved in MeCN (0.9 mL) in a quartz tube, then 100  $\mu$ L of FeCl<sub>3</sub>/MeCN (1.63 mg, 0.01 mmol, 10 mol%) was added to the reaction mixture. The product 65 was detected by GC-MS.

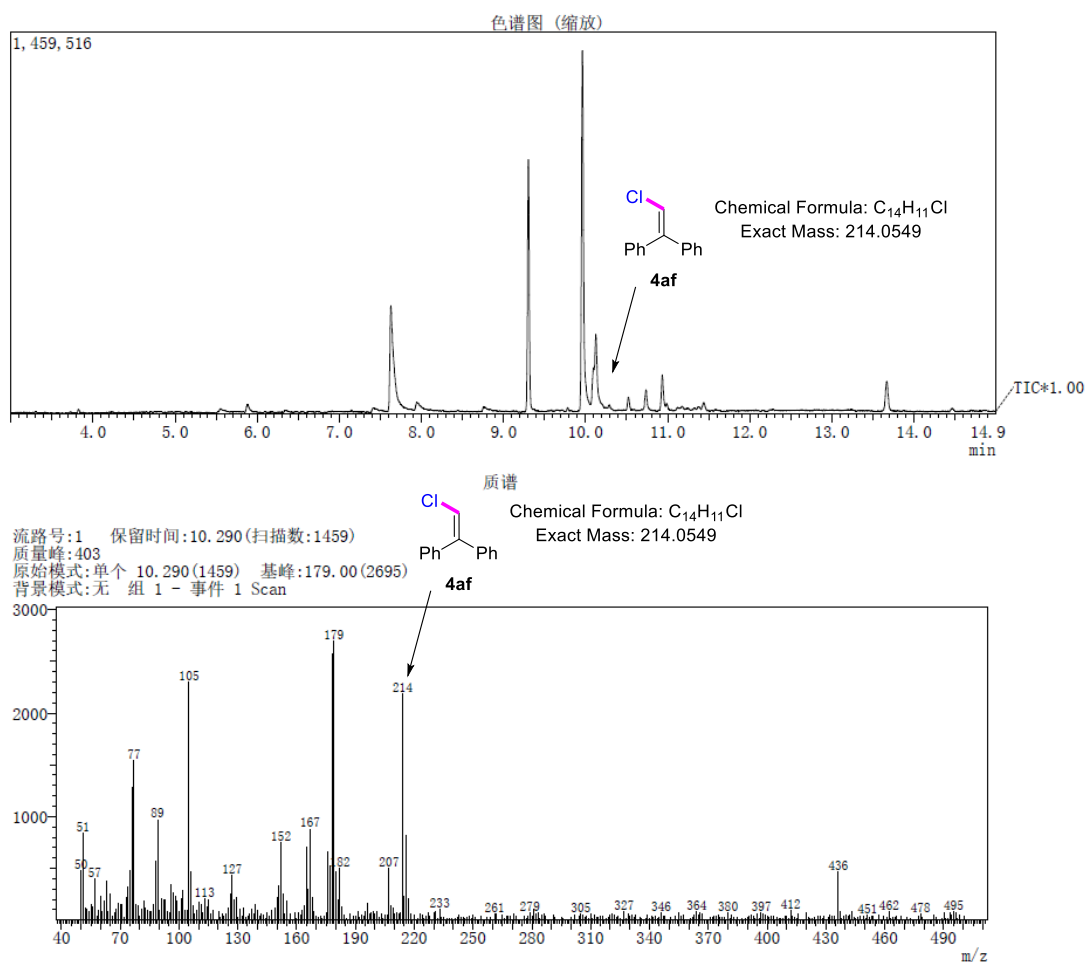

**Figure S2.** GC-MS trace of reaction in Scheme S1-f.

GC-MS method:

| entry      | Rate (°C/min) | Final Temperature (°C) | Keep time (min) |
|------------|---------------|------------------------|-----------------|
| 0          | -             | 50                     | 2               |
| 1          | 25.0          | 280                    | 3.8             |
| Total time |               |                        | 15              |

The column: Rtx-5MS, film thickness: 0.25  $\mu$ m, length: 30 m, inside diameter: 0.25 mm

### 3.2 UV-Vis Spectroscopy

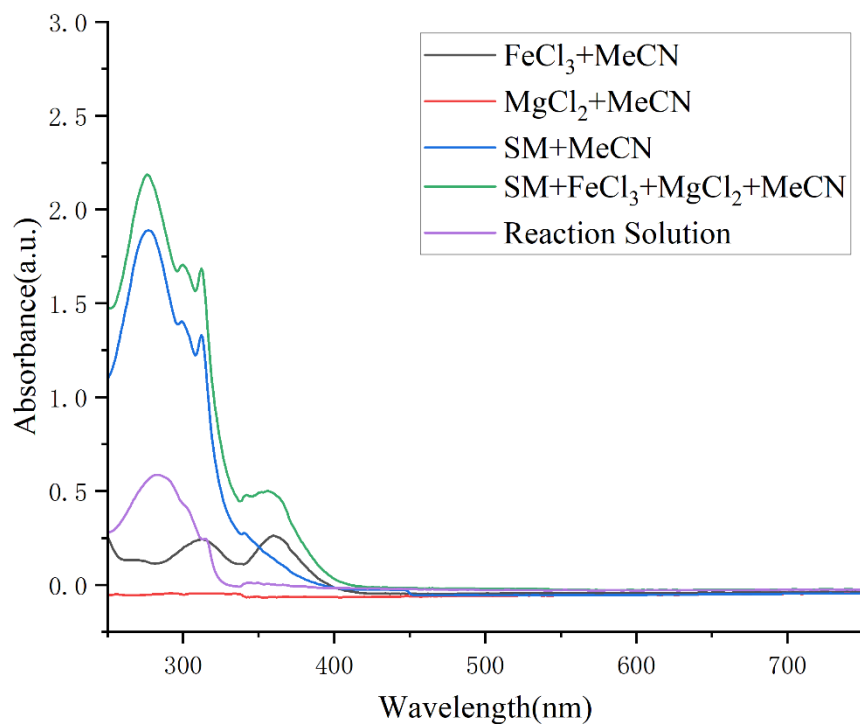

**Figure S3.** UV-Vis spectroscopy with 8-Nitroquinoline. SM is 8-Nitroquinoline (**60'**). Red line: MgCl<sub>2</sub>/MeCN (1.0 mM); Black line: FeCl<sub>3</sub>/MeCN (0.05 mM); Purple line: reaction mixture after 48 h and then diluted to 0.5 mM concentration; brown line: starting material 8-nitroquinoline/MeCN solution (0.5 mM); green line: SM/FeCl<sub>3</sub>/MgCl<sub>2</sub> in MeCN (0.5 mM).

### 3.3 Light On/Off Experiments

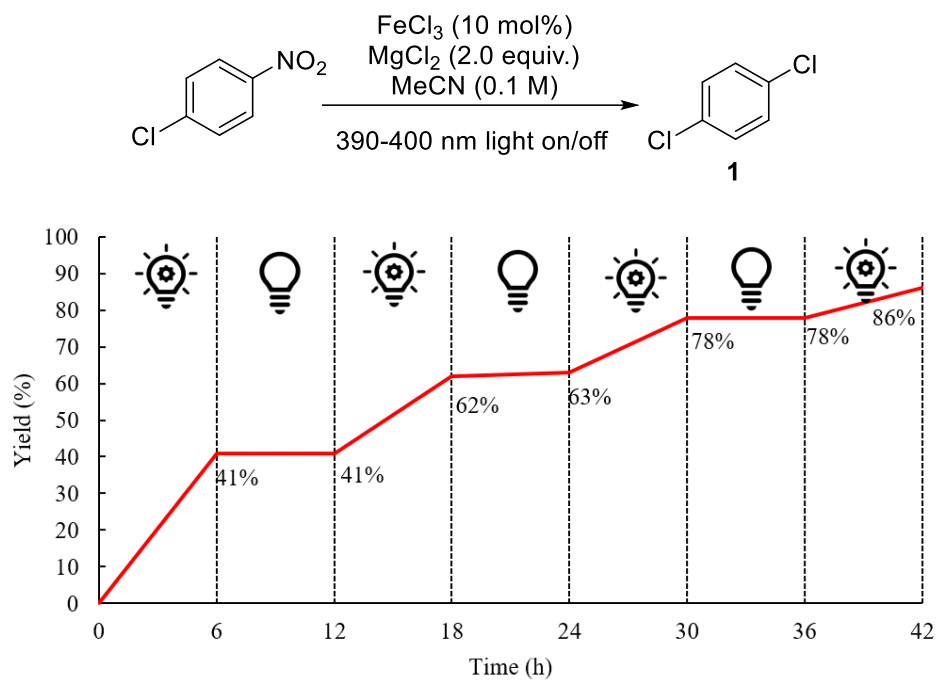

**Figure S4.** Light on/off experiment with 4-chloronitrobenzene.



### 3.4 Detailed optimization of the reaction conditions<sup>a</sup>

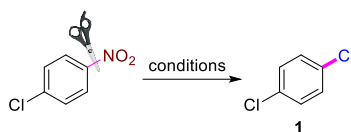

| Entry             | Cat. (10 mol%)                       | Cl Source               | Solvent           | Light             | Yield <sup>[b]</sup> |
|-------------------|--------------------------------------|-------------------------|-------------------|-------------------|----------------------|
| 1                 | NiCl <sub>2</sub>                    | NaCl                    | CHCl <sub>3</sub> | 365 nm            | ND <sup>[c]</sup>    |
| 2                 | CrCl <sub>3</sub>                    | NaCl                    | CHCl <sub>3</sub> | 365 nm            | ND                   |
| 3                 | CuCl <sub>2</sub>                    | NaCl                    | CHCl <sub>3</sub> | 365 nm            | trace                |
| 4                 | FeCl <sub>3</sub>                    | NaCl                    | CHCl <sub>3</sub> | 365 nm            | 9%                   |
| 5                 | FeCl <sub>3</sub>                    | NaCl                    | acetone           | 365 nm            | ND                   |
| 6                 | FeCl <sub>3</sub>                    | NaCl                    | dioxane           | 365 nm            | ND                   |
| 7                 | FeCl <sub>3</sub>                    | NaCl                    | MeCN              | 365 nm            | 36%                  |
| 8                 | FeCl <sub>3</sub>                    | NaCl                    | DCE               | 365 nm            | ND                   |
| 9                 | FeCl <sub>3</sub>                    | conc. HCl               | MeCN              | 365 nm            | 12%                  |
| 10                | FeCl <sub>3</sub>                    | NCS                     | MeCN              | 365 nm            | 33%                  |
| 11                | FeCl <sub>3</sub>                    | ZnCl <sub>2</sub>       | MeCN              | 365 nm            | 20%                  |
| 12                | FeCl <sub>3</sub>                    | MgCl <sub>2</sub>       | MeCN              | 365 nm            | 52%                  |
| 13                | FeCl <sub>3</sub>                    | CCl <sub>4</sub>        | MeCN              | 365 nm            | 23%                  |
| 14                | FeCl <sub>3</sub>                    | NH <sub>4</sub> Cl      | MeCN              | 365 nm            | 31%                  |
| 15                | FeCl <sub>3</sub>                    | TBACl                   | MeCN              | 365 nm            | ND                   |
| 16                | FeCl <sub>3</sub>                    | MgCl <sub>2</sub>       | MeCN              | 370-380 nm        | 78%                  |
| 17                | FeCl <sub>3</sub>                    | MgCl <sub>2</sub>       | MeCN              | 380-390 nm        | 73%                  |
| <b>18</b>         | <b>FeCl<sub>3</sub></b>              | <b>MgCl<sub>2</sub></b> | <b>MeCN</b>       | <b>390-400 nm</b> | <b>86%</b>           |
| 19                | FeCl <sub>3</sub>                    | MgCl <sub>2</sub>       | MeCN              | 400-410 nm        | 76%                  |
| 20                | CoCl <sub>2</sub> ·6H <sub>2</sub> O | MgCl <sub>2</sub>       | MeCN              | 390-400 nm        | trace                |
| 21                | CuCl                                 | MgCl <sub>2</sub>       | MeCN              | 390-400 nm        | 10%                  |
| 22                | NiCl <sub>2</sub> ·6H <sub>2</sub> O | MgCl <sub>2</sub>       | MeCN              | 390-400 nm        | 10%                  |
| 23                | NiCl <sub>2</sub> ·DME               | MgCl <sub>2</sub>       | MeCN              | 390-400 nm        | 10%                  |
| 24                | BiCl <sub>3</sub>                    | MgCl <sub>2</sub>       | MeCN              | 390-400 nm        | trace                |
| 25                | CuCl <sub>2</sub> ·2H <sub>2</sub> O | MgCl <sub>2</sub>       | MeCN              | 390-400 nm        | 10%                  |
| 26                | CeCl <sub>3</sub>                    | MgCl <sub>2</sub>       | MeCN              | 390-400 nm        | 15%                  |
| 27                | TiCl <sub>4</sub>                    | MgCl <sub>2</sub>       | MeCN              | 390-400 nm        | 10%                  |
| 28                | Fe <sub>2</sub> O <sub>3</sub>       | MgCl <sub>2</sub>       | MeCN              | 390-400 nm        | trace                |
| 29                | Ferrous Oxalate                      | MgCl <sub>2</sub>       | MeCN              | 390-400 nm        | 10%                  |
| 30                | Iron(II) gluconate                   | MgCl <sub>2</sub>       | MeCN              | 390-400 nm        | trace                |
| 31                | Ferric glycine                       | MgCl <sub>2</sub>       | MeCN              | 390-400 nm        | trace                |
| 32                | Fe <sub>3</sub> O <sub>4</sub>       | MgCl <sub>2</sub>       | MeCN              | 390-400 nm        | trace                |
| 33                | Fe(acac) <sub>3</sub>                | MgCl <sub>2</sub>       | MeCN              | 390-400 nm        | 10%                  |
| 34                | Fe(NO <sub>3</sub> ) <sub>3</sub>    | MgCl <sub>2</sub>       | MeCN              | 390-400 nm        | 15%                  |
| 35                | FeSO <sub>4</sub> ·7H <sub>2</sub> O | MgCl <sub>2</sub>       | MeCN              | 390-400 nm        | trace                |
| 36                | Ferrous fumarate                     | MgCl <sub>2</sub>       | MeCN              | 390-400 nm        | trace                |
| 37 <sup>[c]</sup> | FeCl <sub>3</sub>                    | MgCl <sub>2</sub>       | MeCN              | 390-400 nm        | 86%                  |
| 38 <sup>[d]</sup> | FeCl <sub>3</sub>                    | MgCl <sub>2</sub>       | MeCN              | 390-400 nm        | 86%                  |
| 39 <sup>[e]</sup> | FeCl <sub>3</sub>                    | MgCl <sub>2</sub>       | MeCN              | 390-400 nm        | 86%                  |
| 40                | FeCl <sub>3</sub>                    | /                       | MeCN              | 390-400 nm        | trace                |
| 41                | /                                    | MgCl <sub>2</sub>       | MeCN              | 390-400 nm        | ND                   |

<sup>[a]</sup> Unless otherwise noted, the reaction was carried out with **1a** (0.10 mmol) and TM cat. (10 mol%) in solvent (1 mL, 0.1 M) under the irradiation of indicated light (5 W LED) cooling with fan. <sup>[b]</sup> Yields refer to the isolated products. ND means no desired product was detected by GC-MS. <sup>[c]</sup> 30 mol% FeCl<sub>3</sub> was used <sup>[d]</sup> 60 mol% FeCl<sub>3</sub> was used <sup>[e]</sup> 1 equiv. of FeCl<sub>3</sub> was used.

### 3.5 General Procedure for the Photoinduced FeCl<sub>3</sub>-Catalyzed Chlorination.

The substrate nitroarene (0.10 mmol), MgCl<sub>2</sub> (19 mg, 0.2 mmol, 2 equiv.), 4A MS (20 mg) was dissolved in MeCN (0.9 mL) in a quartz tube, 100 μL of FeCl<sub>3</sub>/MeCN (1.63 mg, 0.01 mmol, 10 mol%) was added to the reaction mixture, which was then stirred at room temperature with the irradiation under 390-400 nm light (5 W, 2 cm distance from the light). The process of the reaction was monitored by GC-MS (about 24 h-84 h). Upon completion, the solution was transferred to a random flask and was removed under vacuum and the residue was purified by silica gel chromatography with n-pentane or pentane/Et<sub>2</sub>O as mobile phase to afford the desired chloroarenes **2** and **3**.

### 3.6 NMR Data.

#### 1,4-Dichlorobenzene (**1**)<sup>[1]</sup>

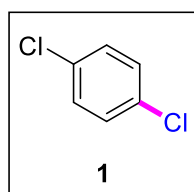

**Compound 1** was prepared according to the general procedure in about 24 h. After standard work-up and purification, **1** was obtained (12.6 mg, 86% yield).

<sup>1</sup>H NMR (400 MHz, CDCl<sub>3</sub>) δ 7.26 (s, 4H).

<sup>13</sup>C NMR (101 MHz, CDCl<sub>3</sub>) δ 132.5, 129.8.

#### 1,3-Dichlorobenzene (**2**)<sup>[2]</sup>

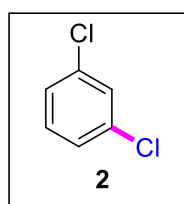

**Compound 2** was prepared according to the general procedure in about 82 h. After standard work-up and purification, **2** was obtained (8.5 mg, 58% yield).

<sup>1</sup>H NMR (400 MHz, CDCl<sub>3</sub>) δ 7.42 – 7.37 (m, 1H), 7.26 (d, *J* = 3.2 Hz, 3H).

<sup>13</sup>C NMR (101 MHz, CDCl<sub>3</sub>) δ 135.0, 130.5, 128.7, 126.9.

#### 1,2-Dichlorobenzene (**3**)<sup>[3]</sup>

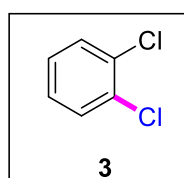

**Compound 3** was prepared according to the general procedure in about 48 h. After standard work-up and purification, **3** was obtained (11.5 mg, 79% yield).

$^1\text{H NMR}$  (400 MHz,  $\text{CDCl}_3$ )  $\delta$  7.47 – 7.41 (m, 2H), 7.20 (dd,  $J = 6.0, 3.6$  Hz, 2H).

$^{13}\text{C NMR}$  (101 MHz,  $\text{CDCl}_3$ )  $\delta$  132.5, 130.5, 127.7.

### 1-Chloro-3-fluorobenzene (**4**)<sup>[4]</sup>

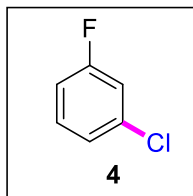

**Compound 4** was prepared according to the general procedure in about 82 h, during which 1 equiv. of  $\text{FeCl}_3$  (16.3 mg) was used. After standard work-up and purification, **4** was obtained (8.1 mg, 62% yield).

$^1\text{H NMR}$  (600 MHz,  $\text{CDCl}_3$ )  $\delta$  7.29 (td,  $J = 8.2, 6.2$  Hz, 1H), 7.16 (d,  $J = 8.0$  Hz, 1H), 7.12 (dt,  $J = 8.8, 2.2$  Hz, 1H), 7.00 (td,  $J = 8.5, 2.2$  Hz, 1H).

$^{13}\text{C NMR}$  (151 MHz,  $\text{CDCl}_3$ )  $\delta$  162.7 (d,  $J = 251.0$  Hz), 135.1 (d,  $J = 11.0$  Hz), 130.6 (d,  $J = 9.0$  Hz), 124.5 (d,  $J = 3.0$  Hz), 116.4 (d,  $J = 24.0$  Hz), 113.8 (d,  $J = 21.0$  Hz).

$^{19}\text{F NMR}$  (565 MHz,  $\text{CDCl}_3$ )  $\delta$  -110.92.

### 1-Chloro-2-fluorobenzene (**5**)<sup>[5]</sup>

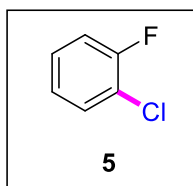

**Compound 5** was prepared according to the general procedure in about 48 h. After standard work-up and purification, **5** was obtained (9.7 mg, 74% yield).

$^1\text{H NMR}$  (400 MHz,  $\text{CDCl}_3$ )  $\delta$  7.42 (td,  $J = 7.8, 1.6$  Hz, 1H), 7.28 (d,  $J = 5.5$  Hz, 1H), 7.20 – 7.06 (m, 2H).

$^{13}\text{C NMR}$  (101 MHz,  $\text{CDCl}_3$ )  $\delta$  130.7, 128.2, 128.0, 124.8 (d,  $J = 4.0$  Hz), 116.7, 116.5.

$^{19}\text{F NMR}$  (376 MHz,  $\text{CDCl}_3$ )  $\delta$  -115.45.

### 1-Chloro-4-fluorobenzene (**6**)<sup>[4]</sup>

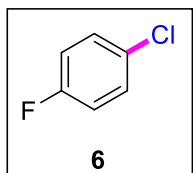

**Compound 6** was prepared according to the general procedure in about 82 h, during which 1 equiv. of  $\text{FeCl}_3$  (16.3 mg) was used. After standard work-up and purification, **6** was obtained (6.5 mg, 50% yield).

$^1\text{H NMR}$  (400 MHz,  $\text{CDCl}_3$ )  $\delta$  7.39 – 7.24 (m, 2H), 7.07 – 6.97 (m, 2H).

$^{13}\text{C NMR}$  (151 MHz,  $\text{CDCl}_3$ )  $\delta$  161.3 (d,  $J = 246.0$  Hz), 129.9 (d,  $J = 8.2$  Hz), 129.1 (d,  $J = 3.3$  Hz), 116.7 (d,  $J = 22.9$  Hz).

$^{19}\text{F NMR}$  (376 MHz,  $\text{CDCl}_3$ )  $\delta$  -115.93 (m, 1F).

### 1-Chloro-2-(trifluoromethyl)benzene (**7**)<sup>[6]</sup>

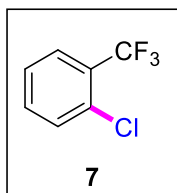

**Compound 7** was prepared according to the general procedure in about 84 h. After standard work-up and purification, **7** was obtained (12.1 mg, 67% yield).

$^1\text{H NMR}$  (400 MHz,  $\text{CDCl}_3$ )  $\delta$  7.73 – 7.65 (m, 1H), 7.53 – 7.44 (m, 2H), 7.39 – 7.32 (m, 1H).

$^{19}\text{F NMR}$  (376 MHz,  $\text{CDCl}_3$ )  $\delta$  -62.67.

### 1-Chloro-4-(trifluoromethoxy)benzene (**8**)<sup>[7]</sup>

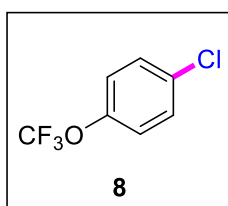

**Compound 8** was prepared according to the general procedure in about 84 h, during which 1 equiv. of  $\text{FeCl}_3$  (16.3 mg) was used. After standard work-up and purification, **8** was obtained (10.4 mg, 53% yield).

$^1\text{H NMR}$  (400 MHz,  $\text{CDCl}_3$ )  $\delta$  7.39 – 7.33 (m, 2H), 7.18 – 7.12 (m, 2H).

$^{13}\text{C NMR}$  (101 MHz,  $\text{CDCl}_3$ )  $\delta$  147.7 (d,  $J = 2.0$  Hz), 132.5, 129.9, 122.4, 120.4 (q,  $J = 258.6$  Hz)

$^{19}\text{F NMR}$  (376 MHz,  $\text{CDCl}_3$ )  $\delta$  -58.20.

### 1-Chloro-2-(trifluoromethoxy)benzene (**9**)<sup>[8]</sup>

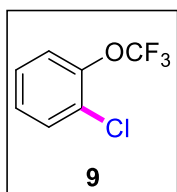

**Compound 9** was prepared according to the general procedure in about 84 h. After standard work-up and purification, **9** was obtained (12.9 mg, 66% yield).

$^1\text{H NMR}$  (400 MHz,  $\text{CDCl}_3$ )  $\delta$  7.50 (dd,  $J = 7.7, 1.8$  Hz, 1H), 7.43 – 7.31 (m, 2H), 7.31 – 7.23 (m, 1H).

$^{13}\text{C NMR}$  (101 MHz,  $\text{CDCl}_3$ )  $\delta$  145.3 (d,  $J = 2.0$  Hz), 131.0, 127.8 (d,  $J = 5.0$  Hz), 127.5, 122.6, 120.5 (q,  $J = 260.0$  Hz).

$^{19}\text{F NMR}$  (376 MHz,  $\text{CDCl}_3$ )  $\delta$  -57.9.

### 4-Chlorobenzonitrile (**10**)<sup>[9]</sup>

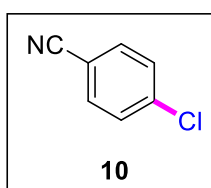

**Compound 10** was prepared according to the general procedure in about 84 h. After standard work-up and purification, **10** was obtained (11.2 mg, 82% yield).

$^1\text{H NMR}$  (400 MHz,  $\text{CDCl}_3$ )  $\delta$  7.63 – 7.58 (m, 2H), 7.50 – 7.45 (m, 2H).

$^{13}\text{C NMR}$  (101 MHz,  $\text{CDCl}_3$ )  $\delta$  139.5, 133.3, 129.7, 117.9, 110.7.

### *p*-Chloroacetophenone (**11**)<sup>[1]</sup>

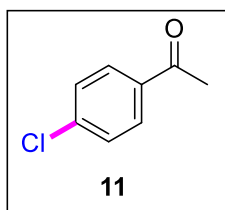

**Compound 11** was prepared according to the general procedure in about 70 h. After standard work-up and purification, **11** was obtained (11.2 mg, 73% yield).

<sup>1</sup>H NMR (400 MHz, CDCl<sub>3</sub>) δ 7.89 – 7.80 (m, 2H), 7.42 – 7.34 (m, 2H), 2.55 (s, 3H).

<sup>13</sup>C NMR (101 MHz, CDCl<sub>3</sub>) δ 196.6, 139.3, 135.2, 129.5, 128.7, 26.3.

### 2-Chloroacetophenone (**12**)<sup>[10]</sup>

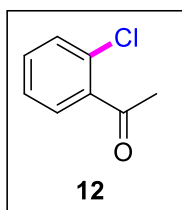

**Compound 12** was prepared according to the general procedure in about 32 h. After standard work-up and purification, **12** was obtained (10.5 mg, 68% yield).

<sup>1</sup>H NMR (400 MHz, CDCl<sub>3</sub>) δ 7.53 (dd, *J* = 7.6, 1.4 Hz, 1H), 7.42 – 7.24 (m, 3H), 2.62 (s, 3H).

<sup>13</sup>C NMR (101 MHz, CDCl<sub>3</sub>) δ 200.2, 138.9, 131.8, 131.1, 130.5, 129.2, 126.8, 30.5.

### Methyl 4-chlorobenzoate (**13**)<sup>[9]</sup>

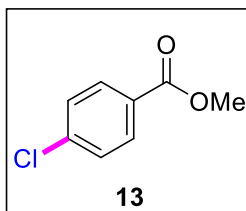

**Compound 13** was prepared according to the general procedure in about 32 h. After standard work-up and purification, **13** was obtained (10.2 mg, 60% yield).

<sup>1</sup>H NMR (400 MHz, CDCl<sub>3</sub>) δ 7.97 (d, *J* = 8.5 Hz, 2H), 7.41 (d, *J* = 8.5 Hz, 2H), 3.92 (s, 3H).

<sup>13</sup>C NMR (101 MHz, CDCl<sub>3</sub>) δ 166.1, 139.3, 130.9, 128.6, 128.5,

52.2.

### Chlorobenzene (**14**)<sup>[3]</sup>

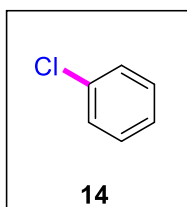

**Compound 14** was prepared according to the general procedure in about 72 h. After standard work-up and purification, **14** was obtained (9.2 mg, 82% yield).

<sup>1</sup>H NMR (400 MHz, CDCl<sub>3</sub>) δ 7.71 – 6.98 (m, 5H).

<sup>13</sup>C NMR (151 MHz, CDCl<sub>3</sub>) δ 134.2, 129.7, 128.6, 126.4.

### *N*-(4-Chlorophenyl)acetamide (**15**)<sup>[11]</sup>

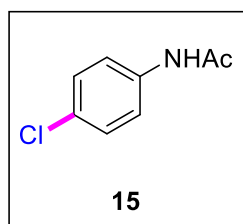

**Compound 15** was prepared according to the general procedure in about 48 h. After standard work-up and purification, **15** was obtained (13.6 mg, 80% yield).

$^1\text{H NMR}$  (400 MHz, DMSO-*d*<sub>6</sub>)  $\delta$  8.05 (d,  $J$  = 8.9 Hz, 2H), 7.78 (d,  $J$  = 8.9 Hz, 2H).

$^{13}\text{C NMR}$  (101 MHz, DMSO)  $\delta$  169.0, 138.4, 128.8, 126.9, 120.9, 40.2, 38.9, 24.1.

### *N*-(2-Chlorophenyl)acetamide (**16**)<sup>[12]</sup>

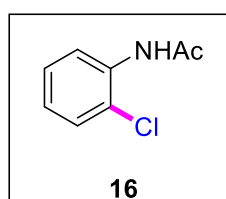

**Compound 16** was prepared according to the general procedure in about 84 h. After standard work-up and purification, **16** was obtained (12.4 mg, 73% yield).

$^1\text{H NMR}$  (400 MHz, CDCl<sub>3</sub>)  $\delta$  8.27 (d,  $J$  = 8.3 Hz, 1H), 7.28 (dd,  $J$  = 8.0, 1.5 Hz, 1H), 7.23 – 7.17 (m, 1H), 6.96 (td,  $J$  = 7.7, 1.6 Hz, 1H), 2.16 (s, 3H).

$^{13}\text{C NMR}$  (101 MHz, CDCl<sub>3</sub>)  $\delta$  168.2, 134.6, 128.9, 127.7, 124.6, 121.6, 24.8.

### *N*-(4-Chlorophenyl)propanamide (**17**)<sup>[13]</sup>

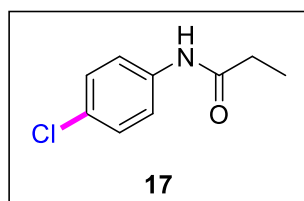

**Compound 17** was prepared according to the general procedure in about 48 h. After standard work-up and purification, **17** was obtained (13.6 mg, 74% yield).

$^1\text{H NMR}$  (400 MHz, CDCl<sub>3</sub>)  $\delta$  7.52 – 7.46 (m, 2H), 7.31 – 7.24 (m, 2H), 2.41 (q,  $J$  = 7.5 Hz, 2H), 1.25 (t,  $J$  = 7.5 Hz, 3H).

$^{13}\text{C NMR}$  (101 MHz, CDCl<sub>3</sub>)  $\delta$  172.4, 136.5, 129.1, 128.9, 121.2, 30.6, 9.6.

### *N*-(2-Chlorophenyl)benzamide (**18**)<sup>[12]</sup>

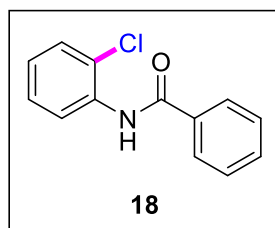

**Compound 18** was prepared according to the general procedure in about 48 h. After standard work-up and purification, **18** was obtained (15.5 mg, 67% yield).

$^1\text{H NMR}$  (400 MHz, CDCl<sub>3</sub>)  $\delta$  8.57 (dd,  $J$  = 8.4, 1.6 Hz, 1H), 7.96 – 7.90 (m, 2H), 7.61 – 7.56 (m, 1H), 7.52 (dd,  $J$  = 8.2, 6.5 Hz, 2H), 7.42 (dd,  $J$  = 8.1, 1.5 Hz, 1H), 7.34 (ddd,  $J$  = 8.5, 7.5, 1.5 Hz, 1H), 7.08 (td,  $J$  = 7.7, 1.6 Hz, 1H).

$^{13}\text{C NMR}$  (101 MHz, CDCl<sub>3</sub>)  $\delta$  165.2, 134.7, 134.6, 132.2, 129.0, 128.9, 127.9, 127.1, 124.7, 123.0, 121.4.

### *N*-(4-Chlorophenyl)benzamide (**19**)<sup>[11]</sup>

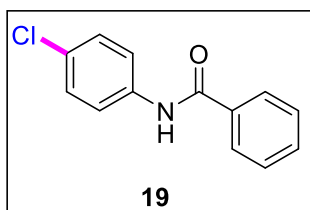

**Compound 19** was prepared according to the general procedure in about 48 h. After standard work-up and purification, **19** was obtained (19.7 mg, 85% yield).

**<sup>1</sup>H NMR (400 MHz, DMSO-*d*<sub>6</sub>)** δ 7.96 – 7.90 (m, 2H), 7.83 – 7.76 (m, 2H), 7.58 (d, *J* = 7.3 Hz, 1H), 7.52 (dd, *J* = 8.2, 6.5 Hz, 2H), 7.42 – 7.36 (m, 2H).

**<sup>13</sup>C NMR (101 MHz, DMSO)** δ 166.1, 138.3, 134.8, 132.0, 128.8, 128.7, 127.9, 127.7, 122.2.

### *N*-(4-Chlorophenyl)-4-fluorobenzamide (**20**)<sup>[14]</sup>

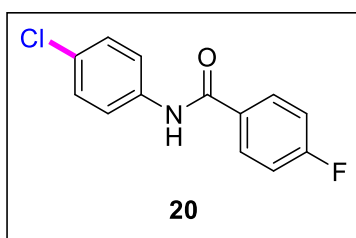

**Compound 20** was prepared according to the general procedure in about 48 h, during which 1 equiv. of FeCl<sub>3</sub> (16.3 mg) was used. After standard work-up and purification, **20** was obtained (19.5 mg, 78% yield).

**<sup>1</sup>H NMR (400 MHz, CDCl<sub>3</sub>)** δ 7.86 (dd, *J* = 8.7, 5.3 Hz, 2H), 7.57 (d, *J* = 8.7 Hz, 2H), 7.32 (d, *J* = 8.8 Hz, 2H), 7.14 (t, *J* = 8.6 Hz, 2H).

**<sup>13</sup>C NMR (101 MHz, CDCl<sub>3</sub>)** δ 166.5 (d, *J* = 154.5 Hz), 163.7, 136.3, 130.7, 129.7, 129.4 (d, *J* = 9.1 Hz), 129.1, 121.5, 115.9 (d, *J* = 22.2 Hz).

**<sup>19</sup>F NMR (376 MHz, CDCl<sub>3</sub>)** δ -106.93.

### *N*-(4-Chlorophenyl)-3-fluorobenzamide (**21**)<sup>[15]</sup>

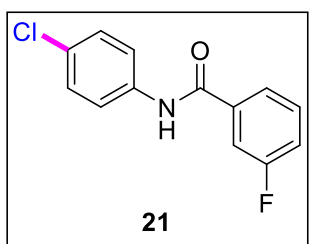

**Compound 21** was prepared according to the general procedure in about 48 h, during which 1 equiv. of FeCl<sub>3</sub> (16.3 mg) was used. After standard work-up and purification, **21** was obtained (18.0 mg, 72% yield).

**<sup>1</sup>H NMR (400 MHz, DMSO-*d*<sub>6</sub>)** δ 7.75 (dddd, *J* = 20.5, 9.9, 3.0, 1.5 Hz, 4H), 7.57 (dd, *J* = 7.9, 5.8 Hz, 1H), 7.48 – 7.36 (m, 3H).

**<sup>13</sup>C NMR (101 MHz, DMSO)** δ 164.6, 162.2 (d, *J* = 245.4 Hz), 138.0, 137.2 (d, *J* = 7.1 Hz), 131.0 (d, *J* = 8.1 Hz), 128.9, 127.9, 124.1, 122.3, 118.9 (d, *J* = 21.2 Hz), 114.7 (d, *J* = 22.2 Hz).

**<sup>19</sup>F NMR (376 MHz, DMSO)** δ -112.44 (m, 1F).

### *N*-(4-Chlorophenyl)-2-fluorobenzamide (**22**)<sup>[16]</sup>

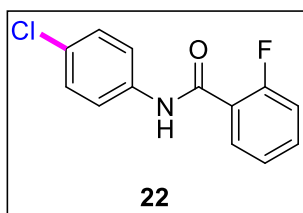

**Compound 22** was prepared according to the general procedure in about 48 h, during which 1 equiv. of FeCl<sub>3</sub> (16.3 mg) was used. After standard work-up and purification, **22** was obtained (22.0 mg, 88% yield).

**<sup>1</sup>H NMR (400 MHz, CDCl<sub>3</sub>)** δ 8.39 (d, *J* = 15.8 Hz, 1H), 8.07 (td, *J* = 8.0, 1.9 Hz, 1H), 7.57 – 7.51 (m, 2H), 7.50 –

7.40 (m, 1H), 7.25 (dd, *J* = 8.5, 2.1 Hz, 2H), 7.15 – 7.05 (m, 1H).

**<sup>13</sup>C NMR (101 MHz, CDCl<sub>3</sub>)** δ 161.5, 161.2 (d, *J* = 4.0 Hz), 159.1, 136.2, 134.0 (d, *J* = 9.1 Hz), 132.2 (d, *J* = 2.1 Hz), 129.7, 129.1, 125.2 (d, *J* = 3.0 Hz), 121.7, 121.0 (d, *J* = 11.1 Hz), 116.1 (d, *J* = 25.3 Hz).

**<sup>19</sup>F NMR (376 MHz, CDCl<sub>3</sub>)** δ -113.12 (m, 1F).

### *N*-(4-Chlorophenyl)-3-(trifluoromethyl)benzamide (**23**)<sup>[21]</sup>

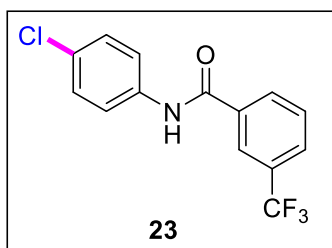

**Compound 23** was prepared according to the general procedure in about 48 h, during which 1 equiv. of FeCl<sub>3</sub> (16.3 mg) was used. After standard work-up and purification, **23** was obtained (24.6 mg, 82% yield).

**<sup>1</sup>H NMR (400 MHz, CDCl<sub>3</sub>)** δ 8.08 (d, *J* = 1.8 Hz, 1H), 8.04 – 8.00 (m, 1H), 7.81 – 7.77 (m, 1H), 7.62 – 7.55 (m, 3H), 7.34 – 7.28 (m, 2H).

**<sup>13</sup>C NMR (101 MHz, CDCl<sub>3</sub>)** δ 164.5, 135.7 (d, *J* = 61.6 Hz), 131.3 (d, *J* = 32.3 Hz), 130.4, 130.1, 129.5, 129.1, 128.6 (q, *J* = 4.0 Hz), 124.9, 124.0 (q, *J* = 4.0 Hz), 122.2, 121.8.

**<sup>19</sup>F NMR (376 MHz, CDCl<sub>3</sub>)** δ -62.74.

### *N*-(2-Chlorophenyl)-4-fluorobenzamide (**24**)<sup>[14]</sup>

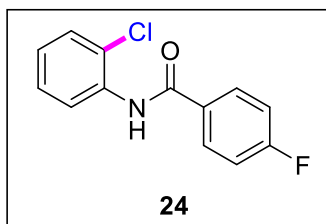

**Compound 24** was prepared according to the general procedure in about 48 h, during which 1 equiv. of FeCl<sub>3</sub> (16.3 mg) was used. After standard work-up and purification, **24** was obtained (16.2 mg, 65% yield).

**<sup>1</sup>H NMR (400 MHz, CDCl<sub>3</sub>)** δ 8.52 (dd, *J* = 8.3, 1.5 Hz, 1H), 7.96 – 7.90 (m, 2H), 7.41 (dd, *J* = 8.0, 1.5 Hz, 1H),

7.33 (ddd, *J* = 8.5, 7.6, 1.5 Hz, 1H), 7.19 (t, *J* = 8.6 Hz, 2H), 7.09 (td, *J* = 7.7, 1.5 Hz, 1H).

**<sup>13</sup>C NMR (101 MHz, CDCl<sub>3</sub>)** δ 166.4, 164.2, 163.8, 134.5, 130.8 (d, *J* = 3.0 Hz), 129.5 (d, *J* = 10.1 Hz), 128.5 (d, *J* = 115.1 Hz), 124.9, 123.1, 121.5, 116.0 (d, *J* = 22.2 Hz).

**<sup>19</sup>F NMR (376 MHz, CDCl<sub>3</sub>)** δ -106.77 (m, 1F).



### *N*-(4-Chlorophenyl)benzenesulfonamide (**25**)<sup>[17]</sup>

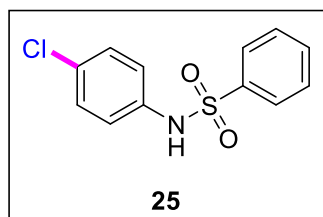

**Compound 25** was prepared according to the general procedure in about 48 h, during which 1 equiv. of FeCl<sub>3</sub> (16.3 mg) was used. After standard work-up and purification, **25** was obtained (18.7 mg, 70% yield).

<sup>1</sup>H NMR (400 MHz, CDCl<sub>3</sub>) δ 7.78 (ddt, *J* = 7.0, 5.0, 2.1 Hz, 1H), 7.56 (td, *J* = 7.3, 1.4 Hz, 1H), 7.49 – 7.41 (m, 1H),

7.23 – 7.16 (m, 1H), 7.03 (ddd, *J* = 8.8, 3.8, 2.1 Hz, 1H).

<sup>13</sup>C NMR (101 MHz, CDCl<sub>3</sub>) δ 138.6, 134.9, 133.3, 129.4, 129.2, 127.2, 123.1.

### *N*-(4-Chlorophenyl)-4-fluorobenzenesulfonamide (**26**)<sup>[18]</sup>

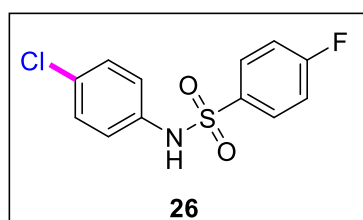

**Compound 26** was prepared according to the general procedure in about 48 h, during which 1 equiv. of FeCl<sub>3</sub> (16.3 mg) was used. After standard work-up and purification, **26** was obtained (20.0 mg, 70% yield).

<sup>1</sup>H NMR (400 MHz, CDCl<sub>3</sub>) δ 7.83 – 7.76 (m, 1H), 7.25 – 7.18 (m, 1H), 7.13 (dd, *J* = 8.9, 8.2 Hz, 1H), 7.09

– 7.01 (m, 1H).

<sup>13</sup>C NMR (101 MHz, CDCl<sub>3</sub>) δ 165.3 (d, *J* = 256.5 Hz), 134.7, 134.5 (d, *J* = 3.0 Hz), 131.4, 130.0 (d, *J* = 10.1 Hz), 129.5, 123.2, 116.5 (d, *J* = 2.0 Hz).

<sup>19</sup>F NMR (376 MHz, CDCl<sub>3</sub>) δ -103.70 (m, 1F).

### (3-Chlorophenyl)(3-nitrophenyl)methanone (**27<sup>a</sup>**)<sup>[16]</sup> and 3,3'-

### Dichlorobenzophenone (**27<sup>b</sup>**)<sup>[19]</sup>

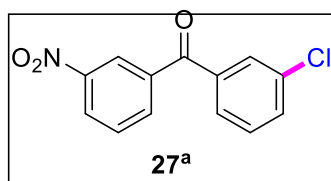

**Compound 27<sup>a</sup>** and **27<sup>b</sup>** was prepared according to the general procedure in about 72 h. After standard work-up and purification, **27<sup>a</sup>** (13.1 mg, 50% yield) and **27<sup>b</sup>** (5.0 mg, 20% yield) were obtained.

**Compound 27<sup>a</sup>** <sup>1</sup>H NMR (400 MHz, CDCl<sub>3</sub>) δ 8.53 (t, *J* = 1.9 Hz, 1H), 8.39 (ddd, *J* = 8.2, 2.3, 1.1 Hz, 1H), 8.05 (dt, *J* = 7.7, 1.4 Hz, 1H), 7.71 (t, *J* = 1.9 Hz, 1H), 7.66 (t, *J* = 8.0 Hz, 1H), 7.61 – 7.53 (m, 2H), 7.41 (t, *J* = 7.9 Hz, 1H).

<sup>13</sup>C NMR (101 MHz, CDCl<sub>3</sub>) δ 192.8, 148.1, 138.4, 137.8, 135.3, 135.1, 133.3, 130.0, 129.8, 129.8, 128.0, 127.1, 124.6.

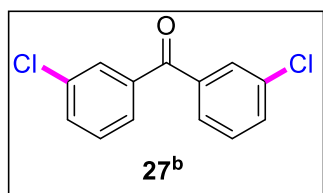

**Compound 27<sup>b</sup>** <sup>1</sup>H NMR (400 MHz, CDCl<sub>3</sub>) δ 7.77 (t, *J* = 1.9 Hz, 2H), 7.64 (dt, *J* = 7.7, 1.3 Hz, 2H), 7.58 (ddd, *J* = 8.0, 2.1, 1.1 Hz, 2H), 7.44 (t, *J* = 7.9 Hz, 2H).

<sup>13</sup>C NMR (101 MHz, CDCl<sub>3</sub>) δ 193.8, 138.6, 134.8, 132.8, 129.8, 129.8, 128.0.

### 3-Chlorobenzamide (**28**)<sup>[1]</sup>

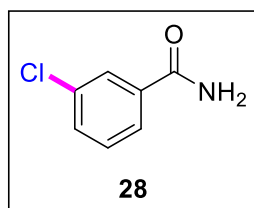

**Compound 28** was prepared according to the general procedure in about 48 h, during which 1 equiv. of FeCl<sub>3</sub> (16.3 mg) was used. After standard work-up and purification, **28** was obtained (7.8 mg, 50% yield).

**<sup>1</sup>H NMR (400 MHz, CDCl<sub>3</sub>)** δ 7.82 (t, *J* = 1.9 Hz, 1H), 7.69 (dt, *J* = 7.8, 1.4 Hz, 1H), 7.51 (ddd, *J* = 8.0, 2.1, 1.1 Hz, 1H), 7.39 (t,

*J* = 7.8 Hz, 1H).

**<sup>13</sup>C NMR (101 MHz, CDCl<sub>3</sub>)** δ 168.3, 134.9, 134.8, 132.2, 130.0, 127.7, 125.4.

### 4-Chlorobenzophenone (**29**)<sup>[9]</sup>

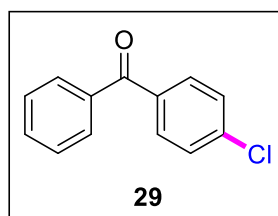

**Compound 29** was prepared according to the general procedure in about 82 h, during which 1 equiv. of FeCl<sub>3</sub> (16.3 mg) was used. After standard work-up and purification, **29** was obtained (15.6 mg, 72% yield).

**<sup>1</sup>H NMR (400 MHz, CDCl<sub>3</sub>)** δ 7.80 – 7.74 (m, 4H), 7.63 – 7.58 (m, 1H), 7.52 – 7.44 (m, 4H).

**<sup>13</sup>C NMR (101 MHz, CDCl<sub>3</sub>)** δ 195.5, 138.9, 137.2, 135.8, 132.6, 131.4, 129.9, 128.6, 128.4.

### 4-Chlorophenylboronic acid pinacol ester (**30**)<sup>[20]</sup>

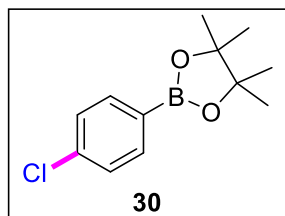

**Compound 30** was prepared according to the general procedure in about 72 h, during which 1 equiv. of FeCl<sub>3</sub> (16.3 mg) was used. After standard work-up and purification, **30** was obtained (14.3 mg, 60% yield).

**<sup>1</sup>H NMR (400 MHz, CDCl<sub>3</sub>)** δ 7.70 – 7.61 (m, 2H), 7.31 – 7.22 (m, 2H), 1.26 (s, 12H).

**<sup>13</sup>C NMR (101 MHz, CDCl<sub>3</sub>)** δ 137.5, 136.1, 128.0, 84.0, 24.8.

### 3-Chlorophenylboronic acid pinacol ester (**31**)<sup>[20]</sup>

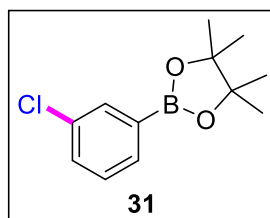

**Compound 31** was prepared according to the general procedure in about 72 h, during which 1 equiv. of FeCl<sub>3</sub> (16.3 mg) was used. After standard work-up and purification, **31** was obtained (13.1 mg, 55% yield).

**<sup>1</sup>H NMR (400 MHz, CDCl<sub>3</sub>)** δ 7.70 (d, *J* = 2.3 Hz, 1H), 7.59 (dd, *J* = 7.4, 1.3 Hz, 1H), 7.34 (ddd, *J* = 8.0, 2.3, 1.2 Hz, 1H), 7.22 (t, *J* = 7.7 Hz, 1H), 1.26 (s, 12H).

**<sup>13</sup>C NMR (101 MHz, CDCl<sub>3</sub>)** δ 134.5, 134.0, 132.6, 131.2, 129.2, 84.1, 24.8.

## 2-Chlorophenylboronic acid pinacol ester (**32**)<sup>[20]</sup>

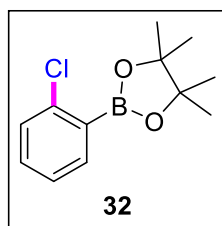

**Compound 32** was prepared according to the general procedure in about 72 h, during which 1 equiv. of FeCl<sub>3</sub> (16.3 mg) was used. After standard work-up and purification, **32** was obtained (14.7 mg, 62% yield).

<sup>1</sup>H NMR (400 MHz, CDCl<sub>3</sub>) δ 7.60 (dd, *J* = 7.9, 1.5 Hz, 1H), 7.25 (dd, *J* = 6.1, 1.9 Hz, 2H), 7.20 – 7.12 (m, 1H), 1.28 (s, 12H).

<sup>13</sup>C NMR (101 MHz, CDCl<sub>3</sub>) δ 139.5, 136.4, 131.8, 129.3, 125.8, 84.1, 24.7.

## 1,2,4-Trichlorobenzene (**33**)<sup>[21]</sup>

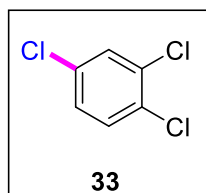

**Compound 33** was prepared according to the general procedure in about 48 h. After standard work-up and purification, **33** was obtained (11.8 mg, 65% yield).

<sup>1</sup>H NMR (400 MHz, CDCl<sub>3</sub>) δ 7.45 (d, *J* = 2.4 Hz, 1H), 7.36 (d, *J* = 8.6 Hz, 1H), 7.18 (dd, *J* = 8.6, 2.4 Hz, 1H)

<sup>13</sup>C NMR (101 MHz, CDCl<sub>3</sub>) δ 133.4, 133.0, 131.1, 130.3, 128.7, 128.0.

## 1,2,3,5-Tetrachlorobenzene (**34**)<sup>[21]</sup>

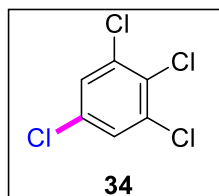

**Compound 34** was prepared according to the general procedure in about 48 h. After standard work-up and purification, **34** was obtained (15.1 mg, 70% yield).

<sup>1</sup>H NMR (400 MHz, CDCl<sub>3</sub>) δ 7.42 – 7.37 (m, 2H).

<sup>13</sup>C NMR (101 MHz, CDCl<sub>3</sub>) δ 134.8, 132.7, 130.3, 128.7.

## 1,2,4-Trichlorobenzene (**35**)<sup>[21]</sup>

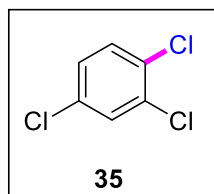

**Compound 35** was prepared according to the general procedure in about 48 h. After standard work-up and purification, **35** was obtained (13.6 mg, 75% yield).

<sup>1</sup>H NMR (400 MHz, CDCl<sub>3</sub>) δ 7.45 (d, *J* = 2.4 Hz, 1H), 7.36 (d, *J* = 8.6 Hz, 1H), 7.18 (dd, *J* = 8.6, 2.4 Hz, 1H)

<sup>13</sup>C NMR (101 MHz, CDCl<sub>3</sub>) δ 133.4, 133.0, 131.1, 130.3, 128.7, 128.0.

### 1,2,3-Trichlorobenzene (36)<sup>[22]</sup>

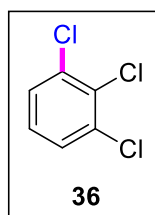

**Compound 36** was prepared according to the general procedure in about 48 h. After standard work-up and purification, **36** was obtained (19.8 mg, 66% yield).

$^1\text{H NMR}$  (400 MHz,  $\text{CDCl}_3$ )  $\delta$  7.37 (d,  $J = 8.1$  Hz, 2H), 7.14 (dd,  $J = 8.4, 7.7$  Hz, 1H).

$^{13}\text{C NMR}$  (101 MHz,  $\text{CDCl}_3$ )  $\delta$  134.3, 131.5, 128.7, 127.5.

### 1,2,3,4-Tetrachlorobenzene (37)<sup>[23]</sup>

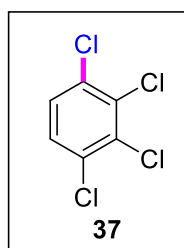

**Compound 37** was prepared according to the general procedure in about 48 h. After standard work-up and purification, **37** was obtained (17.3 mg, 80% yield).

$^1\text{H NMR}$  (400 MHz,  $\text{CDCl}_3$ )  $\delta$  7.34 (s, 2H)

$^{13}\text{C NMR}$  (101 MHz,  $\text{CDCl}_3$ )  $\delta$  133.1, 132.5, 128.4.

### Hexachlorobenzene (38)

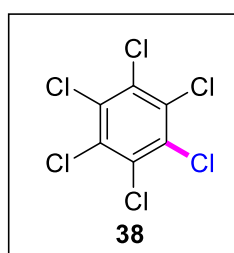

**Compound 35** was prepared according to the general procedure in about 72 h, during which 1 equiv. of  $\text{FeCl}_3$  (16.3 mg) was used. After standard work-up and purification, **38** was obtained (11.4 mg, 40% yield).

$^{13}\text{C NMR}$  (101 MHz,  $\text{CDCl}_3$ )  $\delta$  132.3.

### 1-Chloro-2,3,4-trifluorobenzene (39)<sup>[23]</sup>

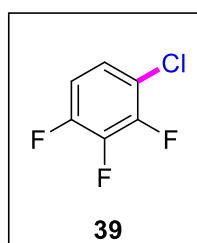

**Compound 39** was prepared according to the general procedure in about 72 h. After standard work-up and purification, **39** was obtained (14.2 mg, 85% yield).

$^1\text{H NMR}$  (400 MHz,  $\text{CDCl}_3$ )  $\delta$  7.18 – 7.11 (m, 1H), 6.95 (tdd,  $J = 9.4, 7.4, 2.3$  Hz, 1H).

$^{13}\text{C NMR}$  (101 MHz,  $\text{CDCl}_3$ )  $\delta$  151.4-149.2 (m), 148.9-146.7 (m), 140.8 (dt,  $J = 255.5$  Hz), 123.9 (dd,  $J = 7.1, 4.0$  Hz), 177.8 (dd,  $J =$

15.2, 4.0 Hz), 122.3 (dd,  $J = 19.2, 4.0$  Hz).

$^{19}\text{F NMR}$  (376 MHz,  $\text{CDCl}_3$ )  $\delta$  -133.33 (m, 1F), -134.99 (m, 1F), -156.48 (m, 1F).

### 1,3-Dichloro-2-fluorobenzene (40)<sup>[24]</sup>

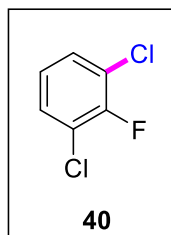

**Compound 40** was prepared according to the general procedure in about 72 h. After standard work-up and purification, **40** was obtained (11.6 mg, 70% yield).

$^1\text{H NMR}$  (400 MHz,  $\text{CDCl}_3$ )  $\delta$  7.31 (dd,  $J = 8.2, 6.5$  Hz, 2H), 7.03 (td,  $J = 8.1, 1.6$  Hz, 1H).

$^{13}\text{C NMR}$  (101 MHz,  $\text{CDCl}_3$ )  $\delta$  154.3 (d,  $J = 251.5$  Hz), 129.0, 124.7 (d,  $J = 3.0$  Hz), 122.5 (d,  $J = 18.2$  Hz).

$^{19}\text{F NMR}$  (376 MHz,  $\text{CDCl}_3$ )  $\delta$ -115.76 (t, 1F).

### 1-(3-Chloro-4-fluorophenyl)ethanone (41)

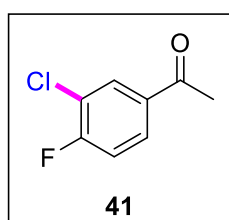

**Compound 41** was prepared according to the general procedure in about 36 h. After standard work-up and purification, **41** was obtained (14.7 mg, 85% yield).

$^1\text{H NMR}$  (400 MHz,  $\text{CDCl}_3$ )  $\delta$  8.04 (dt,  $J = 7.1, 1.6$  Hz, 1H), 7.88 (ddd,  $J = 8.5, 4.6, 2.2$  Hz, 1H), 7.25 (q,  $J = 8.6$  Hz, 1H), 2.60 (s, 3H).

$^{13}\text{C NMR}$  (101 MHz,  $\text{CDCl}_3$ )  $\delta$  195.3, 161.0 (d,  $J = 258.6$  Hz), 134.2 (d,  $J = 3.0$  Hz), 131.2, 128.7 (d,  $J = 8.1$  Hz), 121.8 (d,  $J = 18.2$  Hz), 116.8 (d,  $J = 21.2$  Hz), 26.5.

$^{19}\text{F NMR}$  (376 MHz,  $\text{CDCl}_3$ )  $\delta$ -107.67 (m, 1F).

### 2-Chloro-1,3-difluorobenzene (42)

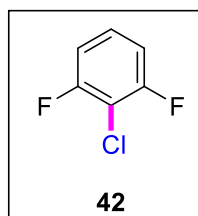

**Compound 42** was prepared according to the general procedure in about 72 h. After standard work-up and purification, **42** was obtained (12.2 mg, 82% yield).

$^1\text{H NMR}$  (400 MHz,  $\text{CDCl}_3$ )  $\delta$  7.25 – 7.17 (m, 1H), 7.02 – 6.94 (m, 2H).

$^{13}\text{C NMR}$  (101 MHz,  $\text{CDCl}_3$ )  $\delta$  159.1 (dd,  $J = 249.0, 3.0$  Hz), 127.5 (t,  $J = 9.0$  Hz), 112.0 (dt,  $J = 19.0, 3.0$  Hz), 109.9 (d,  $J = 21.0$  Hz).

$^{19}\text{F NMR}$  (376 MHz,  $\text{CDCl}_3$ )  $\delta$ -113.1 (2F).

### 2-Chloro-1,4-difluorobenzene (43)<sup>[25]</sup>

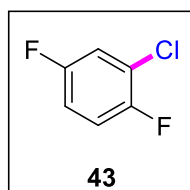

**Compound 43** was prepared according to the general procedure in about 72 h. After standard work-up and purification, **43** was obtained (12.3 mg, 83% yield).

$^1\text{H NMR}$  (400 MHz,  $\text{CDCl}_3$ )  $\delta$  7.18 – 7.07 (m, 2H), 6.95 (ddt,  $J = 9.1, 7.6, 3.3$  Hz, 1H).

$^{13}\text{C NMR}$  (101 MHz,  $\text{CDCl}_3$ )  $\delta$  159.4 - 156.9 (m), 155.9 - 153.5 (m), 121.7 (dd,  $J = 20.2, 11.1$  Hz), 117.7 (d,  $J = 27.3$  Hz), 117.1 (dd,  $J = 24.2, 9.1$  Hz), 114.8 (dd,  $J = 24.2, 7.1$  Hz).

$^{19}\text{F}$  NMR (376 MHz,  $\text{CDCl}_3$ )  $\delta$ -117.00 (m, 1F), -121.44 (m, 1F).

### 2,4-Dichlorofluorobenzene (**44**)<sup>[51]</sup>

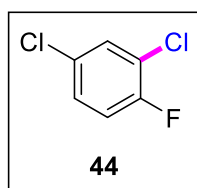

**Compound 44** was prepared according to the general procedure in about 42 h. After standard work-up and purification, **44** was obtained (14.9 mg, 90% yield).

$^1\text{H}$  NMR (400 MHz,  $\text{CDCl}_3$ )  $\delta$  7.40 (dd,  $J = 6.4, 2.6$  Hz, 1H), 7.21 (ddd,  $J = 8.8, 4.1, 2.5$  Hz, 1H), 7.08 (t,  $J = 8.7$  Hz, 1H).

$^{13}\text{C}$  NMR (101 MHz,  $\text{CDCl}_3$ )  $\delta$  157.0 (d,  $J = 250.5$  Hz), 130.4, 129.5 (d,  $J = 4.0$  Hz), 128.2 (d,  $J = 7.1$  Hz), 122.0 (d,  $J = 19.2$  Hz), 117.5 (d,  $J = 22.2$  Hz).

$^{19}\text{F}$  NMR (376 MHz,  $\text{CDCl}_3$ )  $\delta$ -117.77 (m, 1F).

### 1,5-Dichloro-2,4-difluorobenzene (**45**)

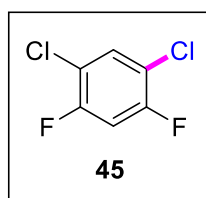

**Compound 45** was prepared according to the general procedure in about 72 h. After standard work-up and purification, **45** was obtained (13.2 mg, 72% yield).

$^1\text{H}$  NMR (400 MHz,  $\text{CDCl}_3$ )  $\delta$  7.47 (t,  $J = 7.4$  Hz, 1H), 7.02 (t,  $J = 8.5$  Hz, 1H).

$^{13}\text{C}$  NMR (101 MHz,  $\text{CDCl}_3$ )  $\delta$  156.7 (dd,  $J = 253.5, 11.1$  Hz), 131.1, 117.1 (dd,  $J = 15.2, 8.1$  Hz), 106.0 (t,  $J = 26.3$  Hz).

$^{19}\text{F}$  NMR (376 MHz,  $\text{CDCl}_3$ )  $\delta$ -112.02 (t, 2F).

### 1,4-Dichloro-2-(trifluoromethyl)benzene (**46**)<sup>[26]</sup>

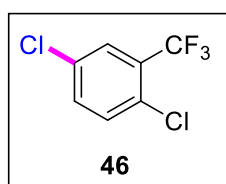

**Compound 46** was prepared according to the general procedure in about 48 h. After standard work-up and purification, **46** was obtained (13.3 mg, 62% yield).

$^1\text{H}$  NMR (400 MHz,  $\text{CDCl}_3$ )  $\delta$  7.69 (s, 1H), 7.46 (s, 2H)

$^{13}\text{C}$  NMR (101 MHz,  $\text{CDCl}_3$ )  $\delta$  133.0, 132.8, 132.6, 130.7 (q,  $J = 2.0$  Hz), 129.8 (q,  $J = 32.3$  Hz), 127.8 (q,  $J = 6.1$  Hz), 122.1 (q,  $J = 277.8$  Hz).

$^{19}\text{F}$  NMR (376 MHz,  $\text{CDCl}_3$ )  $\delta$  -63.18.

### 1,2,5-Trichloro-3-(trifluoromethyl)benzene (**47**)

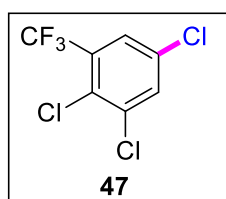

**Compound 47** was prepared according to the general procedure in about 48 h. After standard work-up and purification, **47** was obtained (21.2 mg, 85% yield).

$^1\text{H}$  NMR (400 MHz,  $\text{CDCl}_3$ )  $\delta$  7.77 (s, 1H), 7.67 – 7.60 (m, 1H).

$^{13}\text{C}$  NMR (101 MHz,  $\text{CDCl}_3$ )  $\delta$  137.1, 132.8, 131.6, 131.1, 129.1 (q,  $J = 6.0$  Hz), 128.1 (d,  $J = 33.3$  Hz), 121.8 (d,  $J = 274.7$  Hz).

$^{19}\text{F}$  NMR (376 MHz,  $\text{CDCl}_3$ )  $\delta$  -62.84 (m, 3F).

### 1,4-Dichloro-2-(trifluoromethyl)benzene (**48**)<sup>[26]</sup>

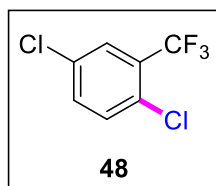

**Compound 48** was prepared according to the general procedure in about 48 h, during which 1 equiv. of  $\text{FeCl}_3$  (16.3 mg) was used. After standard work-up and purification, **48** was obtained (10.8 mg, 50% yield).

$^1\text{H}$  NMR (400 MHz,  $\text{CDCl}_3$ )  $\delta$  7.69 (s, 1H), 7.46 (s, 2H)

$^{13}\text{C}$  NMR (101 MHz,  $\text{CDCl}_3$ )  $\delta$  133.0, 132.8, 132.6, 130.7 (q,  $J = 2.0$  Hz), 129.8 (q,  $J = 32.3$  Hz), 127.8 (q,  $J = 6.1$  Hz), 122.1 (q,  $J = 277.8$  Hz).

$^{19}\text{F}$  NMR (376 MHz,  $\text{CDCl}_3$ )  $\delta$  -63.18.

### *N*-(4-Chloro-2-fluorophenyl)acetamide (**49**)<sup>[27]</sup>

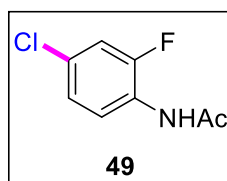

**Compound 49** was prepared according to the general procedure in about 48 h. After standard work-up and purification, **49** was obtained (14.1 mg, 75% yield).

$^1\text{H}$  NMR (400 MHz,  $\text{CDCl}_3$ )  $\delta$  8.24 (t,  $J = 8.5$  Hz, 1H), 7.17 – 7.05 (m, 2H), 2.21 (s, 3H).

$^{13}\text{C}$  NMR (101 MHz,  $\text{CDCl}_3$ )  $\delta$  168.3, 152.0 (d,  $J = 302.0$  Hz), 126.9 (dd,  $J = 369.7$ , 10.1 Hz), 126.9 (d,  $J = 369.7$  Hz), 124.7 (d,  $J = 3.0$  Hz), 122.5 (d,  $J = 2.0$  Hz), 115.6 (d,  $J = 23.2$  Hz), 24.6.

$^{19}\text{F}$  NMR (376 MHz,  $\text{CDCl}_3$ )  $\delta$  -128.46 (m, 1F).

### *N*-(2,5-Dichlorophenyl)acetamide (**50**)<sup>[28]</sup>

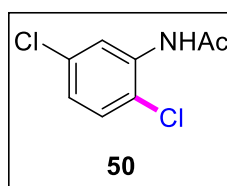

**Compound 50** was prepared according to the general procedure in about 48 h. After standard work-up and purification, **50** was obtained (16.3 mg, 80% yield).

$^1\text{H}$  NMR (400 MHz,  $\text{CDCl}_3$ )  $\delta$  8.48 (t,  $J = 2.8$  Hz, 1H), 7.32 – 7.28 (m, 1H), 7.03 (dt,  $J = 8.7$ , 2.1 Hz, 1H), 2.26 (d,  $J = 1.0$  Hz, 3H).

$^{13}\text{C}$  NMR (101 MHz,  $\text{CDCl}_3$ )  $\delta$  168.2, 135.3, 133.5, 129.5, 124.5, 121.3, 24.9.

### *N*-(2-Chloro-4-fluorophenyl)acetamide (**51**)<sup>[29]</sup>

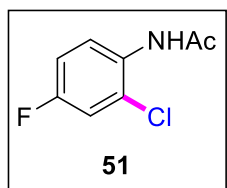

**Compound 51** was prepared according to the general procedure in about 48 h. After standard work-up and purification, **51** was obtained (16.5 mg, 88% yield).

$^1\text{H}$  NMR (400 MHz,  $\text{CDCl}_3$ )  $\delta$  8.27 (dd,  $J = 9.2$ , 5.7 Hz, 1H), 7.11 (dd,  $J = 8.0$ , 2.9 Hz, 1H), 6.99 (ddd,  $J = 9.1$ , 7.8, 2.9 Hz, 1H), 2.22

(s, 3H).

$^{13}\text{C}$  NMR (101 MHz,  $\text{CDCl}_3$ )  $\delta$  168.2, 158.4 (d,  $J = 247.5$  Hz), 131.0(d,  $J = 3.0$  Hz), 123.1 (d,  $J = 8.1$  Hz), 116.2 (d,  $J = 26.3$  Hz), 144.6 (d,  $J = 21.2$  Hz), 24.6.

$^{19}\text{F}$  NMR (376 MHz,  $\text{CDCl}_3$ )  $\delta$ -116.28 (m, 1F).

### *N*-(2,4,5-Trichlorophenyl)acetamide (**52**)

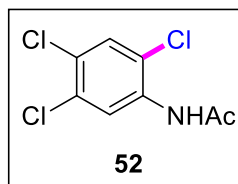

**Compound 52** was prepared according to the general procedure in about 60 h. After standard work-up and purification, **52** was obtained (17.2 mg, 72% yield).

$^1\text{H}$  NMR (400 MHz,  $\text{CDCl}_3$ )  $\delta$  8.61 (s, 1H), 7.46 (s, 1H), 2.25 (s, 3H).

$^{13}\text{C}$  NMR (101 MHz,  $\text{CDCl}_3$ )  $\delta$  168.2, 133.9, 131.9, 129.7, 122.3, 120.7, 24.9.

### *N*-(2-Chloro-4-fluorophenyl)benzenesulfonamide (**53**)

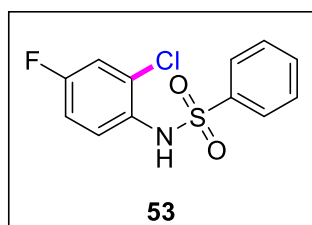

**Compound 53** was prepared according to the general procedure in about 48 h. After standard work-up and purification, **53** was obtained (20.0 mg, 70% yield).

$^1\text{H}$  NMR (400 MHz,  $\text{CDCl}_3$ )  $\delta$  7.75 – 7.70 (m, 2H), 7.66 (dd,  $J = 9.9, 5.3$  Hz, 1H), 7.59 – 7.53 (m, 1H), 7.43 (t,  $J = 7.8$  Hz, 2H), 6.99 (dd,  $J = 5.5, 2.5$  Hz, 1H), 6.86 (s, 1H).

$^{13}\text{C}$  NMR (101 MHz,  $\text{CDCl}_3$ )  $\delta$  159.8 (d,  $J = 249.5$  Hz), 138.6, 133.4, 129.6 (d,  $J = 3.0$  Hz), 129.1, 127.2 (t,  $J = 5.1$  Hz), 125.4 (d,  $J = 9.1$  Hz), 116.6 (d,  $J = 26.3$  Hz), 115.1 (d,  $J = 22.2$  Hz).

$^{19}\text{F}$  NMR (376 MHz,  $\text{CDCl}_3$ )  $\delta$  -113.80 (m, 1F).

### Benzoic acid, 3,4-dichloro-, methyl ester (**54**)<sup>[17]</sup>

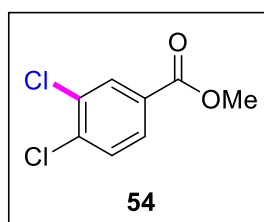

**Compound 54** was prepared according to the general procedure in about 48 h, during which 1 equiv. of  $\text{FeCl}_3$  (16.3 mg) was used. After standard work-up and purification, **54** was obtained (11.3 mg, 55% yield).

$^1\text{H}$  NMR (400 MHz,  $\text{CDCl}_3$ )  $\delta$  8.11 (t,  $J = 2.1$  Hz, 1H), 7.98 – 7.77 (m, 1H), 7.66 – 7.43 (m, 1H), 3.92 (d,  $J = 0.9$  Hz, 3H).

$^{13}\text{C}$  NMR (101 MHz,  $\text{CDCl}_3$ )  $\delta$  165.2, 137.6, 132.9, 131.5, 130.5, 129.9, 128.6, 52.5.

### 1,2-Dichloro-4-methoxybenzene (**55**)<sup>[9]</sup>

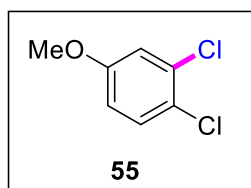

**Compound 55** was prepared according to the general procedure in about 48 h. After standard work-up and purification, **55** was obtained (5.3 mg, 30% yield).

$^1\text{H}$  NMR (400 MHz,  $\text{CDCl}_3$ )  $\delta$  7.32 (d,  $J = 8.9$  Hz, 1H), 6.99 (d,  $J = 2.9$  Hz, 1H), 6.75 (dd,  $J = 8.9, 2.9$  Hz, 1H), 3.79 (s, 3H).



$^{13}\text{C}$  NMR (101 MHz,  $\text{CDCl}_3$ )  $\delta$  158.6, 132.8, 130.6, 123.9, 115.7, 114.1, 55.7.

### 2,5-Dichloropyridine (**56**)<sup>[30]</sup>

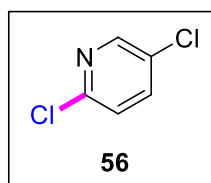

**Compound 56** was prepared according to the general procedure in about 48 h. After standard work-up and purification, **56** was obtained (10.1 mg, 68% yield).

$^1\text{H}$  NMR (600 MHz,  $\text{CDCl}_3$ )  $\delta$  8.28 (d,  $J = 2.5$  Hz, 1H), 7.55 (dd,  $J = 8.5, 2.6$  Hz, 1H), 7.21 (d,  $J = 8.5$  Hz, 1H)

$^{13}\text{C}$  NMR (151 MHz,  $\text{CDCl}_3$ )  $\delta$  149.4, 148.4, 138.4, 130.9, 125.1.

### 2,3-Dichloropyridine (**57**)<sup>[31]</sup>

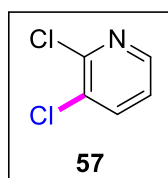

**Compound 57** was prepared according to the general procedure in about 48 h. After standard work-up and purification, **57** was obtained (8.9 mg, 60% yield).

$^1\text{H}$  NMR (400 MHz,  $\text{CDCl}_3$ )  $\delta$  8.30 (dq,  $J = 4.2, 1.8$  Hz, 1H), 7.77 (dq,  $J = 8.0, 1.6$  Hz, 1H), 7.32 – 7.12 (m, 1H).

$^{13}\text{C}$  NMR (101 MHz,  $\text{CDCl}_3$ )  $\delta$  149.2, 147.2, 138.7, 130.6, 123.2.

### 2,3-Dichloro-5-methylpyridine (**58**)

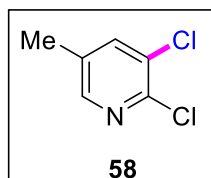

**Compound 58** was prepared according to the general procedure in about 82 h, during which 1 equiv. of  $\text{FeCl}_3$  (16.3 mg) was used. After standard work-up and purification, **58** was obtained (8.1 mg, 50% yield).

$^1\text{H}$  NMR (400 MHz,  $\text{CDCl}_3$ )  $\delta$  8.26 – 8.01 (m, 1H), 7.59 (dt,  $J = 1.5, 0.7$  Hz, 1H), 2.31 (d,  $J = 0.8$  Hz, 3H).

$^{13}\text{C}$  NMR (101 MHz,  $\text{CDCl}_3$ )  $\delta$  147.5, 146.2, 139.3, 133.7, 129.8, 77.3.

### 2,3-Dichloro-6-methoxypyridine (**59**)<sup>[32]</sup>

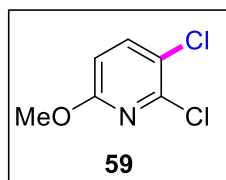

**Compound 59** was prepared according to the general procedure in about 72 h. After standard work-up and purification, **59** was obtained (11.2 mg, 63% yield).

$^1\text{H}$  NMR (400 MHz,  $\text{CDCl}_3$ )  $\delta$  7.59 (dd,  $J = 8.6, 0.9$  Hz, 1H), 6.64 (dd,  $J = 8.5, 0.9$  Hz, 1H), 3.92 (d,  $J = 0.9$  Hz, 3H).

$^{13}\text{C}$  NMR (101 MHz,  $\text{CDCl}_3$ )  $\delta$  161.8, 145.5, 140.8, 121.5, 110.6, 54.4.

### 8-Chloroquinoline (**60**)<sup>[33]</sup>

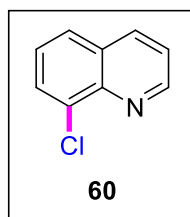

**Compound 60** was prepared according to the general procedure in about 48 h. After standard work-up and purification, **60** was obtained (11.5 mg, 70% yield).

<sup>1</sup>H NMR (400 MHz, CDCl<sub>3</sub>) δ 8.94 (dd, *J* = 4.2, 1.5 Hz, 1H), 8.05 (dd, *J* = 8.3, 1.5 Hz, 1H), 7.72 (d, *J* = 7.5 Hz, 1H), 7.62 (d, *J* = 8.1 Hz, 1H), 7.39 – 7.29 (m, 2H)

<sup>13</sup>C NMR (101 MHz, CDCl<sub>3</sub>) δ 150.7, 144.0, 136.3, 133.0, 129.3, 129.3, 126.8, 126.2, 121.6.

### 5-Chloroquinoline (**61**)<sup>[34]</sup>

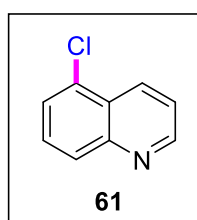

**Compound 61** was prepared according to the general procedure in about 82 h. After standard work-up and purification, **61** was obtained (13.6 mg, 83% yield).

<sup>1</sup>H NMR (400 MHz, CDCl<sub>3</sub>) δ 8.84 (d, *J* = 4.0 Hz, 1H), 8.44 (d, *J* = 8.5 Hz, 1H), 7.94 (dd, *J* = 5.6, 3.9 Hz, 1H), 7.55 – 7.46 (m, 2H), 7.37 (dd, *J* = 8.5, 4.2 Hz, 1H).

<sup>13</sup>C NMR (101 MHz, CDCl<sub>3</sub>) δ 150.8, 148.6, 132.8, 131.2, 129.1, 128.5, 126.5, 126.2, 121.8.

### 5-Chloro-1-methyl-1*H*-imidazole-2-carbonitrile (**62**)

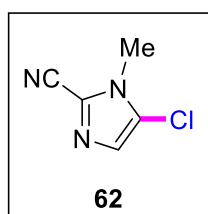

**Compound 62** was prepared according to the general procedure in about 48 h. After standard work-up and purification, **62** was obtained (6.9 mg, 49% yield).

<sup>1</sup>H NMR (400 MHz, CDCl<sub>3</sub>) δ 7.11 (s, 1H), 3.78 (s, 3H).

<sup>13</sup>C NMR (101 MHz, CDCl<sub>3</sub>) δ 128.6, 122.5, 121.6, 110.4, 32.1.

HRMS (ESI) *m/z* calcd for C<sub>5</sub>H<sub>5</sub>ClN<sub>3</sub>Na [M + Na<sup>+</sup>] 142.0167, found 142.0159.

### 5-Chloro-*N*-(2,5-dichlorophenyl)-2-hydroxybenzamide (**63**)<sup>[35]</sup>

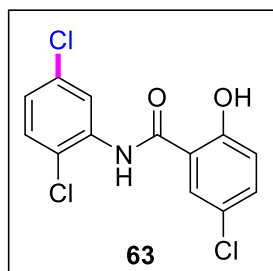

**Compound 63** was prepared according to the general procedure in about 48 h. After standard work-up and purification, **63** was obtained (16.1 mg, 51% yield).

<sup>1</sup>H NMR (600 MHz, CDCl<sub>3</sub>) δ 7.58 (d, *J* = 8.7 Hz, 1H), 7.44 – 7.39 (m, 2H), 7.26 (s, 1H), 7.25 – 7.22 (m, 1H), 7.09 (dd, *J* = 8.7, 2.3 Hz, 1H), 7.04 – 7.01 (m, 2H), 6.84 – 6.79 (m, 2H), 3.01 (s, 3H).

<sup>13</sup>C NMR (151 MHz, CDCl<sub>3</sub>) δ 155.0, 148.3, 130.8, 130.4, 126.4, 125.1, 124.0, 122.6, 119.2, 117.8, 39.6.

HRMS (ESI) *m/z* calcd for C<sub>13</sub>H<sub>8</sub>Cl<sub>3</sub>NO<sub>2</sub>Na [M + Na<sup>+</sup>] 337.9513, found 337.9508.

## N-(4-chloro-2-phenoxyphenyl)methanesulfonamide (**64**)

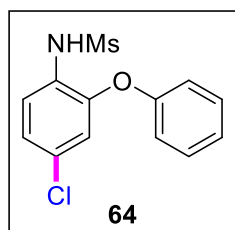

**Compound 64** was prepared according to the general procedure in about 48 h. After standard work-up and purification, **64** was obtained (15.4 mg, 52% yield).

$^1\text{H NMR}$  (600 MHz,  $\text{CDCl}_3$ )  $\delta$  8.27 (dd,  $J = 8.9, 1.3$  Hz, 1H), 7.44 (d,  $J = 2.4$  Hz, 1H), 7.41 (d,  $J = 2.3$  Hz, 1H), 7.36 (dd,  $J = 8.9, 2.4$  Hz, 1H), 7.27 (dd,  $J = 8.9, 2.4$  Hz, 1H), 7.19 (s, 2H), 6.94 (dd,  $J = 8.9, 1.3$  Hz, 1H).

$^{13}\text{C NMR}$  (151 MHz,  $\text{CDCl}_3$ )  $\delta$  167.0, 160.4, 135.1, 132.1, 130.5, 129.1, 128.1, 125.1, 124.6, 124.1, 123.1, 120.7, 115.3.

HRMS (ESI)  $m/z$  calcd for  $\text{C}_{13}\text{H}_{12}\text{ClNO}_3\text{SNa}$  [ $\text{M} + \text{Na}^+$ ] 320.0119, found 320.0126.

## 3-Chloro-N-(2,3,6-trichloro-4-(trifluoromethyl)phenyl)-5-

### (trifluoromethyl)pyridin-2-amine (**65**)

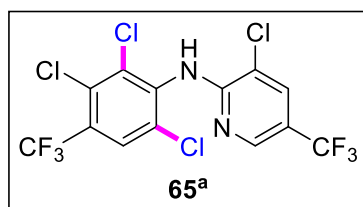

**Compound 65<sup>a</sup>** was prepared according to the general procedure in about 48 h. After standard work-up and purification, **65<sup>a</sup>** (8.8 mg, 20% yield), **65<sup>b</sup>** (11.3 mg, 25% yield) and **65<sup>c</sup>** (18.2 mg, 40% yield) were obtained.

$^1\text{H NMR}$  (400 MHz,  $\text{CDCl}_3$ )  $\delta$  8.29 (dd,  $J = 2.1, 1.1$  Hz, 1H), 7.88 (d,  $J = 2.1$  Hz, 1H), 7.80 (s, 1H).

$^{13}\text{C NMR}$  (101 MHz,  $\text{CDCl}_3$ )  $\delta$  152.6, 143.5 (q,  $J = 4.0$  Hz), 136.4 (d,  $J = 345.4$  Hz), 134.3 (q,  $J = 3.0$  Hz), 131.5, 130.7, 128.4 (d,  $J = 33.3$  Hz), 126.7 (q,  $J = 6.1$  Hz), 123.8 (d,  $J = 137.4$  Hz), 121.1 (d,  $J = 140.4$  Hz), 120.3, 119.9, 116.6.

$^{19}\text{F NMR}$  (376 MHz,  $\text{CDCl}_3$ )  $\delta$  -61.48, -62.97.

HRMS (ESI)  $m/z$  calcd for  $\text{C}_{13}\text{H}_4\text{Cl}_4\text{F}_6\text{N}_2\text{O}_2\text{Na}$  [ $\text{M} + \text{Na}^+$ ] 464.8925, found 464.8918.

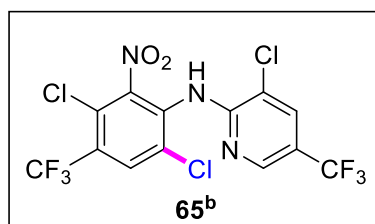

**Compound 65<sup>b</sup>**  $^1\text{H NMR}$  (400 MHz,  $\text{CDCl}_3$ )  $\delta$  8.36 (s, 1H), 8.27 (dd,  $J = 2.1, 1.0$  Hz, 1H), 8.21 (s, 1H).

$^{13}\text{C NMR}$  (101 MHz,  $\text{CDCl}_3$ )  $\delta$  150.8, 142.8 (q,  $J = 4.0$  Hz), 139.1 (d,  $J = 410.1$  Hz), 134.9 (q,  $J = 3.0$  Hz), 134.3, 131.5, 125.3 (d,  $J = 34.3$  Hz), 123.5 (d,  $J = 126.3$  Hz), 122.6 (q,  $J = 4.0$  Hz), 122.0, 121.5 (d,  $J = 25.3$  Hz),

120.1, 118.0.

$^{19}\text{F NMR}$  (376 MHz,  $\text{CDCl}_3$ )  $\delta$  -61.68, -62.86.

HRMS (ESI)  $m/z$  calcd for  $\text{C}_{13}\text{H}_4\text{Cl}_3\text{F}_6\text{N}_3\text{O}_2\text{Na}$  [ $\text{M} + \text{Na}^+$ ] 475.9165, found 475.9158.

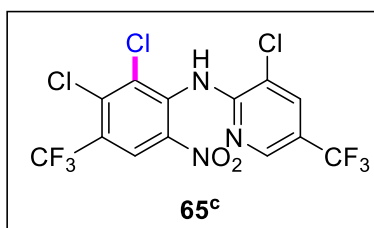

**Compound 65<sup>c</sup>** <sup>1</sup>H NMR (400 MHz, CDCl<sub>3</sub>) δ 8.26 (dd, *J* = 2.1, 1.0 Hz, 1H), 7.98 (s, 1H), 7.87 (d, *J* = 2.1 Hz, 1H).

<sup>13</sup>C NMR (101 MHz, CDCl<sub>3</sub>) δ 152.1, 143.3 (q, *J* = 4.0 Hz), 134.7 (q, *J* = 4.0 Hz), 133.2, 132.2, 130.0 (q, *J* = 5.1 Hz), 128.4 (d, *J* = 33.3 Hz), 124.1 (d, *J* = 24.2

Hz), 122.1 (d, *J* = 115.1 Hz), 121.3, 120.9, 119.9, 116.7.

<sup>19</sup>F NMR (376 MHz, CDCl<sub>3</sub>) δ -61.59, -62.54.

HRMS (ESI) *m/z* calcd for C<sub>13</sub>H<sub>4</sub>Cl<sub>3</sub>F<sub>6</sub>N<sub>3</sub>O<sub>2</sub>Na [M + Na<sup>+</sup>] 475.9165, found 475.9168.

### 3.7 Gram-Scale of the denitrative chlorination reaction.

The 4-nitrochloroarene (1.57 g, 10 mmol), MgCl<sub>2</sub> (1.90 g, 20 mmol, 2 equiv.), 4A MS (2.0 g) was dissolved in MeCN (90 mL) in a quartz tube, 10 mL of FeCl<sub>3</sub>/MeCN (163 mg, 1 mmol, 10 mol%) was added to the reaction mixture, which was then stirred at room temperature with the irradiation under 390-400 nm light (two of 10 W LED, 2 cm distance from the light), the reaction system was cooling with fan, which is shown as below. The process of the reaction was monitored by GC-MS (about 48 h). Upon completion, the solution was transferred to a random flask and was removed under vacuum and the residue was purified by silica gel chromatography with *n*-pentane as mobile phase to afford the desired 1,4-dichloroarene (1.17 g, 80% yield) as white solid.

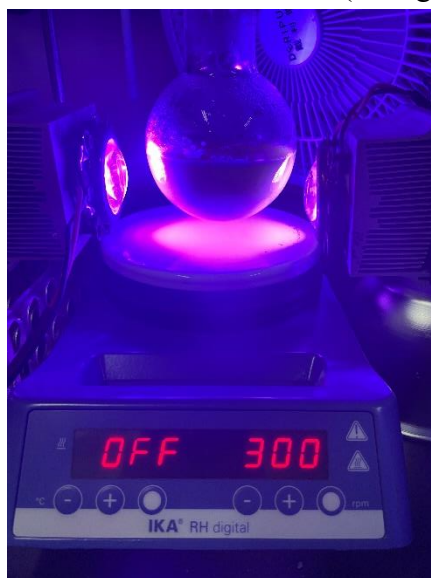

## 4. References

[1] G. A. Molander, L. N. Cavalcanti, *J. Org Chem.* **2011**, *76*, 7195–7203.

- [2] R. Mészáros, S. B. Ötvös, *Green Chem.* **2021**, *23*, 4685–4696.
- [3] X. Min, Q. Chen, *J. Am. Chem. Soc.* **2022**, *144*, 11081–11087.
- [4] S. D. Schimler, M. S. Sanford, *J. Am. Chem. Soc.* **2017**, *139*, 1452–1455.
- [5] Z. Yu, W. Su, *Tetrahedron Lett.* **2013**, *54*, 1261–1263.
- [6] Y. Li, C. Duan, *Synlett.* **2011**, *12*, 1713–1716.
- [7] W. Zheng, C. A. Morales-Rivera, J. W. Lee, P. Liu, M.-Y. Ngai, *Angew. Chem. Int. Ed.* **2018**, *57*, 9645–9649.
- [8] W. Zheng, M. Ngai, *Angew. Chem. Int. Ed.* **2018**, *57*, 13795–13799.
- [9] R. Hernandez-Ruiz, S. Gomez-Gil, M. R. Pedrosa, S. Suarez-Pantiga, S. Roberto, *Org. Biomol. Chem.* **2023**, *21*, 7791–7798.
- [10] Y.-F. Wang, Y.-R. Gao, S. Mao, Y.-L. Zhang, D.-D. Guo, Z.-L. Yan, S.-H. Guo, Y.-Q. Wang, *Org. Lett.* **2014**, *16*, 1610–1613.
- [11] S. Josef, S. Düsel, B. König, *Eur. J. Org. Chem.* **2020**, 1491–1495.
- [12] X. Wan, Z. Ma, B. Li, K. Zhang, S. Cao, S. Zhang, Z. Shi, *J. Am. Chem. Soc.* **2006**, *128*, 7416–7417.
- [13] N. B. Kilimciler, N. M. Palavecino, N. Gruber, D. R. Vega, L. R. Orelli, J. E. Díaz, *J. Org. Chem.* **2023**, doi/10.1021/acs.joc.2c02558  
<https://pubs.acs.org/doi/10.1021/acs.joc.2c02558>
- [14] S. K. Nayak, M. K. Reddy, T. N. G. Row, D. Chopra, *Cryst. Growth Des.* **2011**, *11*, 1578–1596.
- [15] Y.-C. Teo, F.-F. Yong, I. K. Ithnin, S.-H. T.Yio, Z. Lin, *Eur. J. Org. Chem.* **2013**, 515–524.
- [16] M. S. Crocker, Z. Deng, J. N. Johnston, *J. Am. Chem. Soc.* **2022**, *144*, 16708–16714.
- [17] W. Zhang, J. Xie, B. Rao, M. Luo, *J. Org. Chem.* **2015**, *80*, 3504–3511.
- [18] S. Kikkawa, M. Okayasu, H. Hikawa, I. Azumaya, *Cryst. Growth Des.* **2021**, *21*, 1148–1158.
- [19] L. Yang, T. Zeng, Q. Shuai, X. Guo, C.-J. Li, *Chem. Commun.* **2011**, *47*, 2161–2163.
- [20] L. Candish, M. Teders, F. Glorius, *J. Am. Chem. Soc.* **2017**, *139*, 7440–7443.
- [21] L. Sharp-Bucknall, M. Sceney, K. F. White, J. L. Dutton, *Dalton Trans.* **2023**, *52*, 3358–3370.
- [22] V. A. Kallepalli, M. R. Smith, *J. Org. Chem.* **2015**, *80*, 8341–8353.
- [23] W. Wang, X. Yang, R. Dai, Z. Yan, J. Wei, X. Dou, X. Qiu, H. Zhang, C. Wang, Y. Liu, S. Song, N. Jiao, *J. Am. Chem. Soc.* **2022**, *144*, 13415–13425.
- [24] S. Yamada, P. Knochel, *Angew. Chem. Int. Ed.* **2010**, *49*, 2215–2218.
- [25] H. Zhang, J. Wu, X. Zhang, M. Fan, *J. Org. Chem.* **2023**, *88*, 12826–12834.
- [26] J. Qi, J. Xu, H. T. Ang, B. Wang, N. K. Gupta, S. R. Dubbaka, P. O., X. Mao, Y. Lum, J. Wu, *J. Am. Chem. Soc.* **2023**, *145*, 24965–24971.
- [27] L. Jin, X. Zeng, S. Li, G. Qiu, P. Liu, *Eur. J. Org. Chem.* **2022**, e202200399.
- [28] S. Strelakova, A. Kononov, V. Morozov, O. Babaeva, E. Gavrilova, Y. Budnikova, *Adv. Synth. Catal.* **2023**, *365*, 3375–3381.
- [29] F. Liu, N. Wu, X. Cheng, *Org. Lett.* **2021**, *23*, 3015–3020.
- [30] X. Feng, Y. Qu, Y. Han, X. Yu, M. Bao, Y. Yamamoto, *Chem. Commun.* **2012**, *48*,

9468–9470.

[31] X. Zhang, X. Feng, H. Zhang, Y. Yamamoto, M. Bao, *Green Chem.* **2019**, *21*, 5565–5570.

[32] B. Bartels, P. Cueni, D. Muri, M. Koerner, *Bioorg. Med. Chem.* **2018**, *26*, 970–976.

[33] C. Wang, D. M. Flanigan, L. N. Zakharov, P. R. Blakemore, *Org. Lett.* **2011**, *13*, 4024–4027.

[34] A. L. Ware, S. S. Pekamwar, *Indo Am. J. Pharm. Res.* **2019**, *9*, 3040–3043.

[35] R. A. Mook, J. Wang, X.-R. Ren, M. Chen, I. Spasojevic, L. S. Barak, H. K. Lyerly, W. Chen, *Bioorg. Med. Chem.* **2015**, *23*, 5829–5838.

## 5. $^1\text{H}$ NMR and $^{13}\text{C}$ NMR Spectra of the Products.

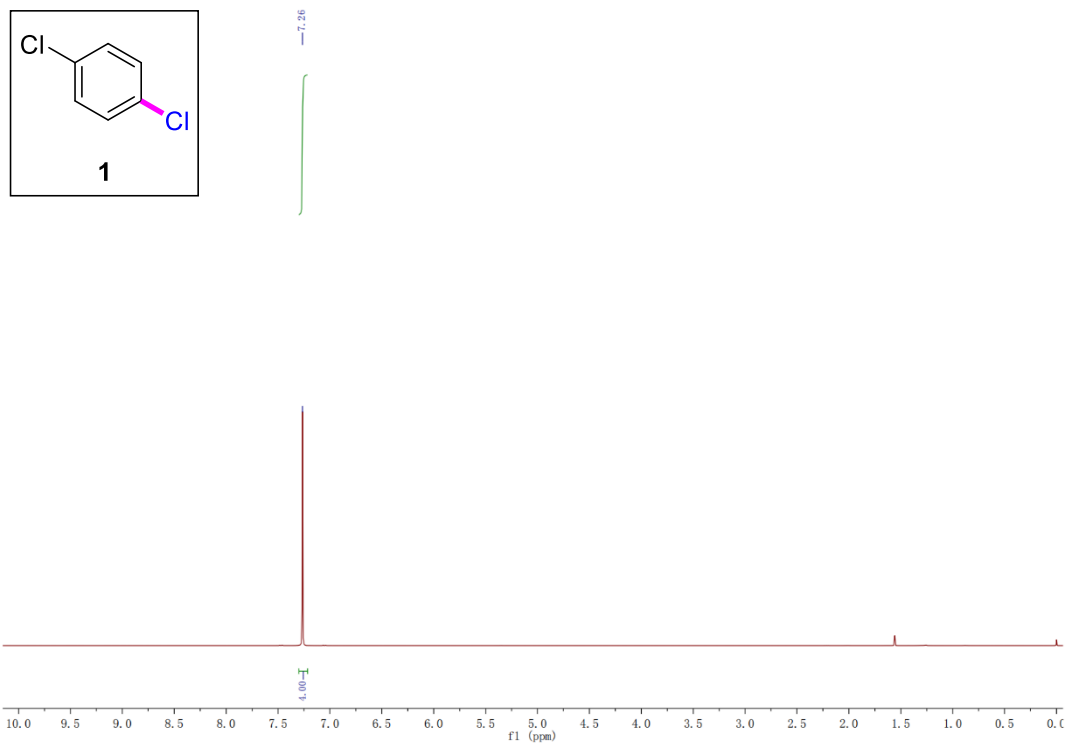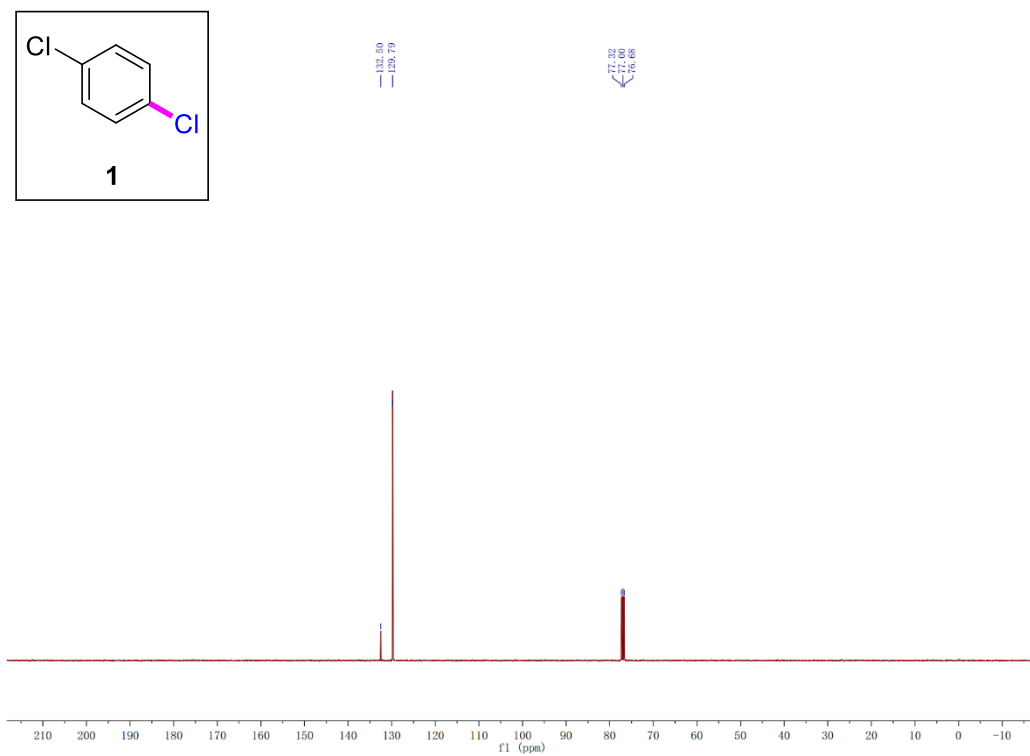

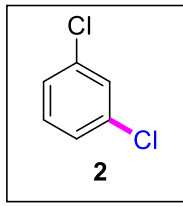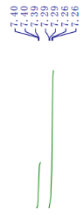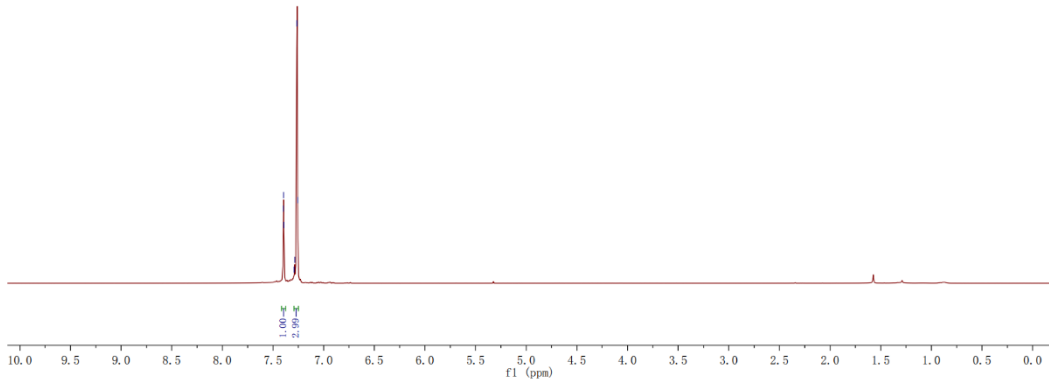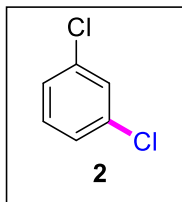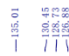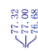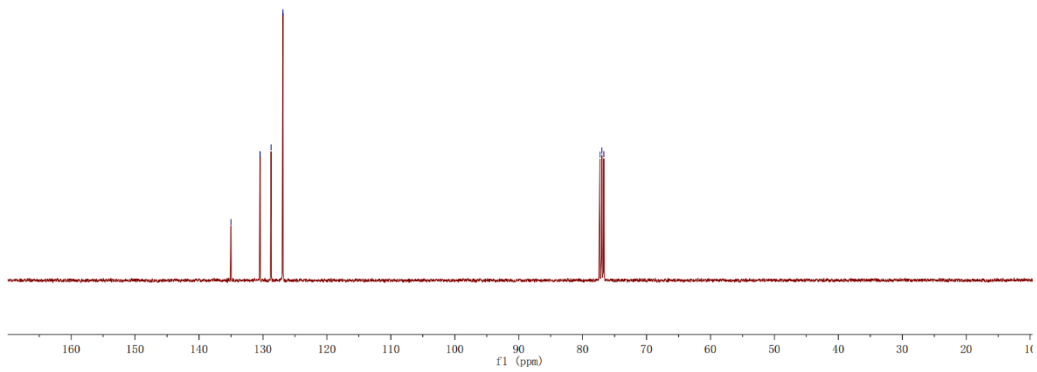



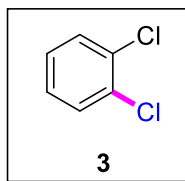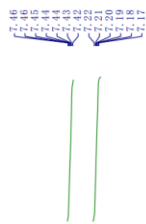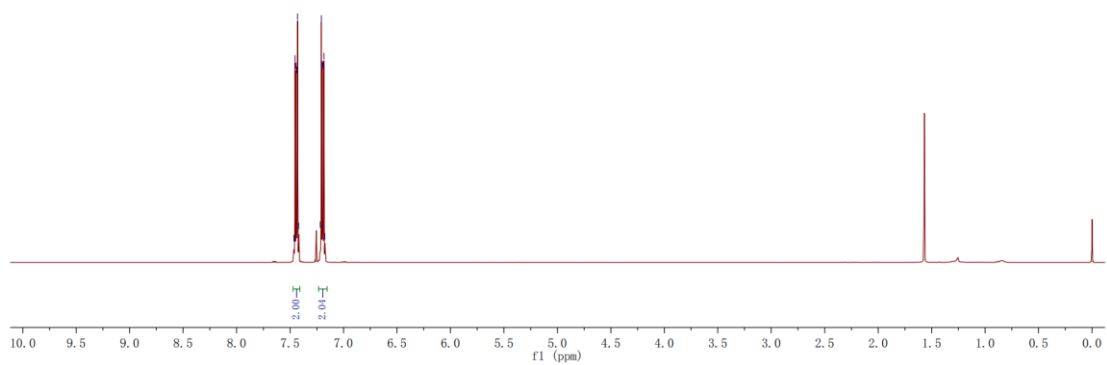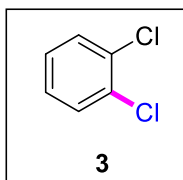

132.54  
130.51  
127.09

77.32  
77.00  
76.68

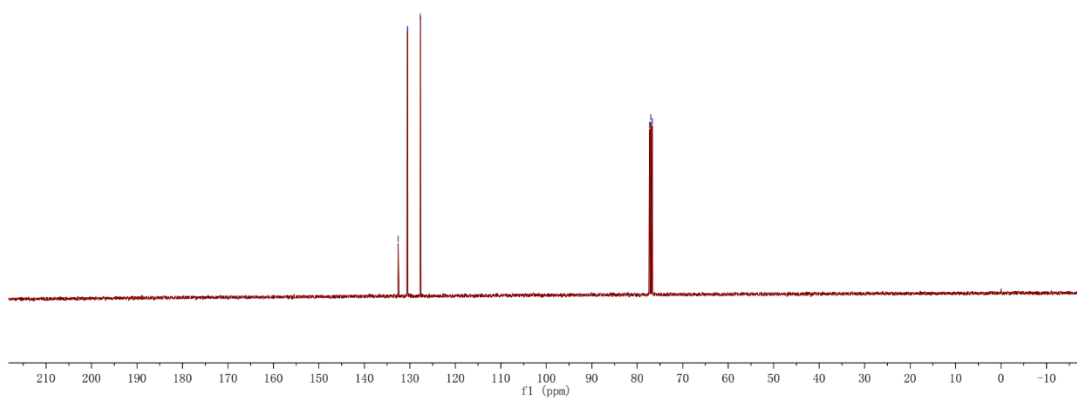

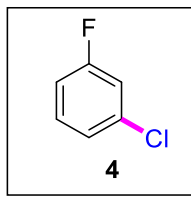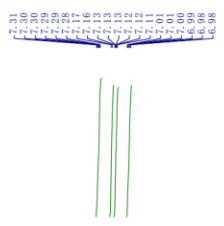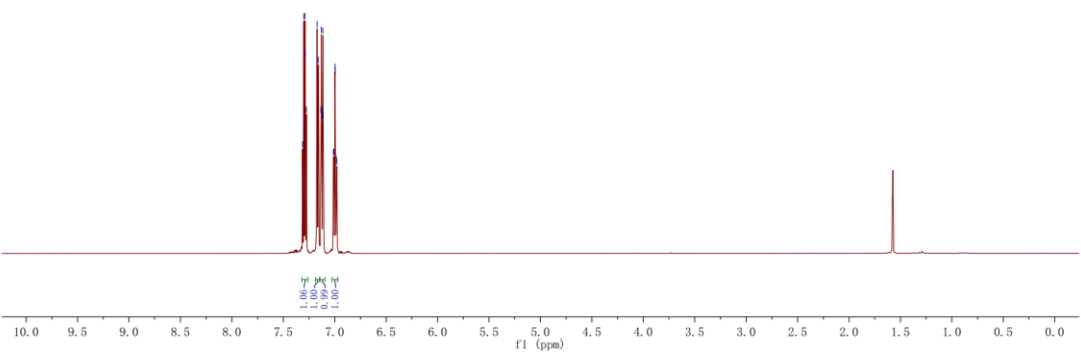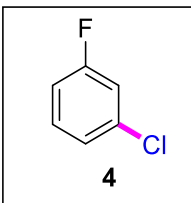

163.57  
161.91

135.09  
135.02  
130.64  
130.58  
128.50  
128.48  
116.41  
113.84  
113.70

77.21  
77.00  
76.79

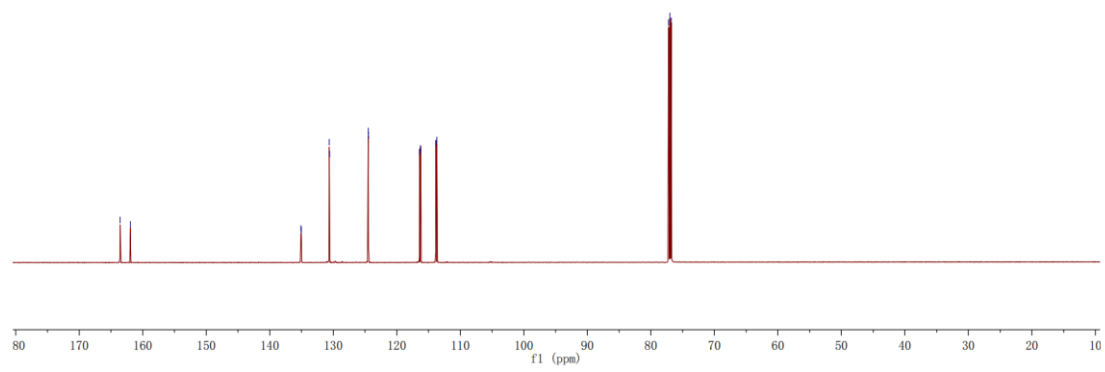



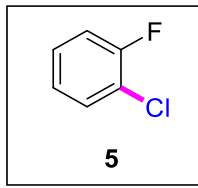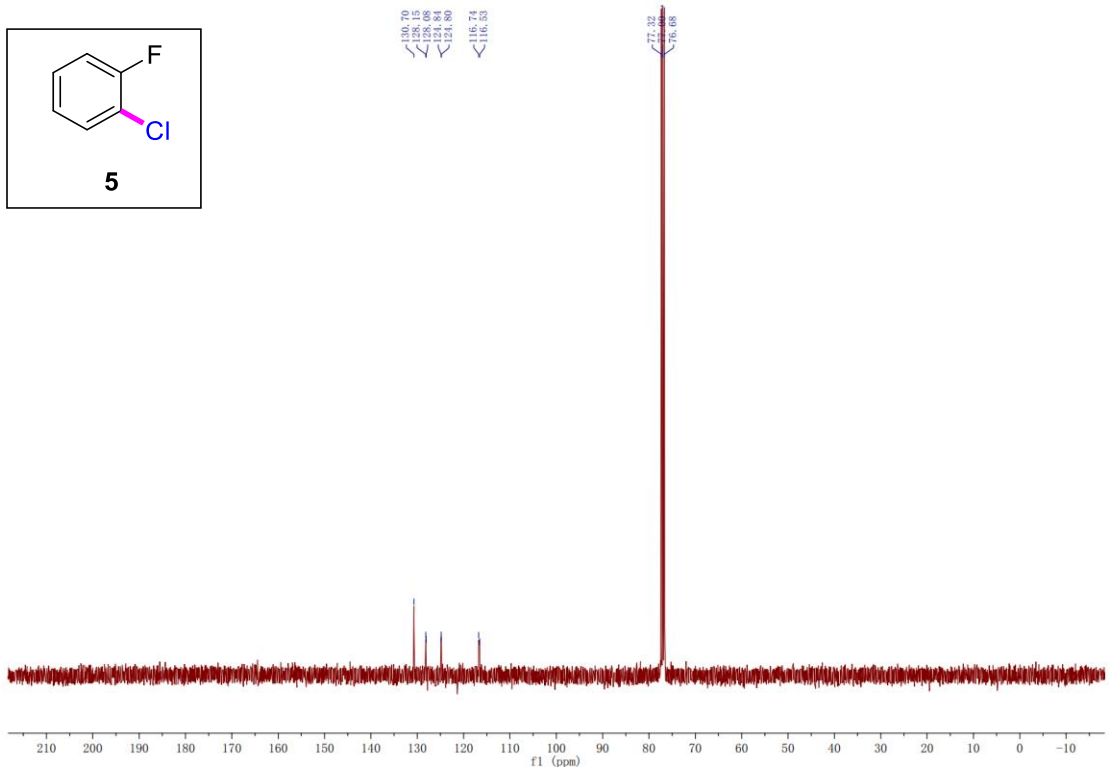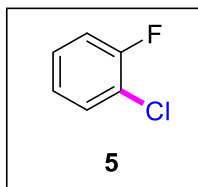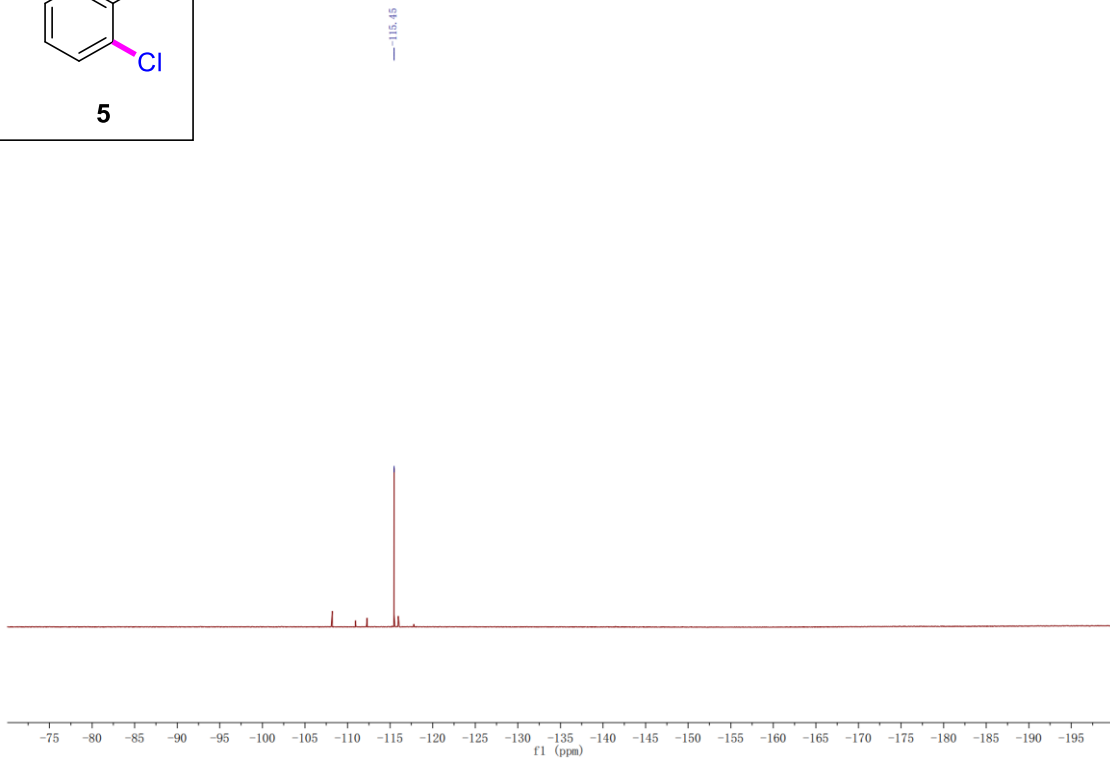

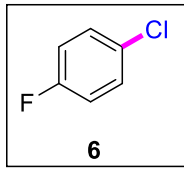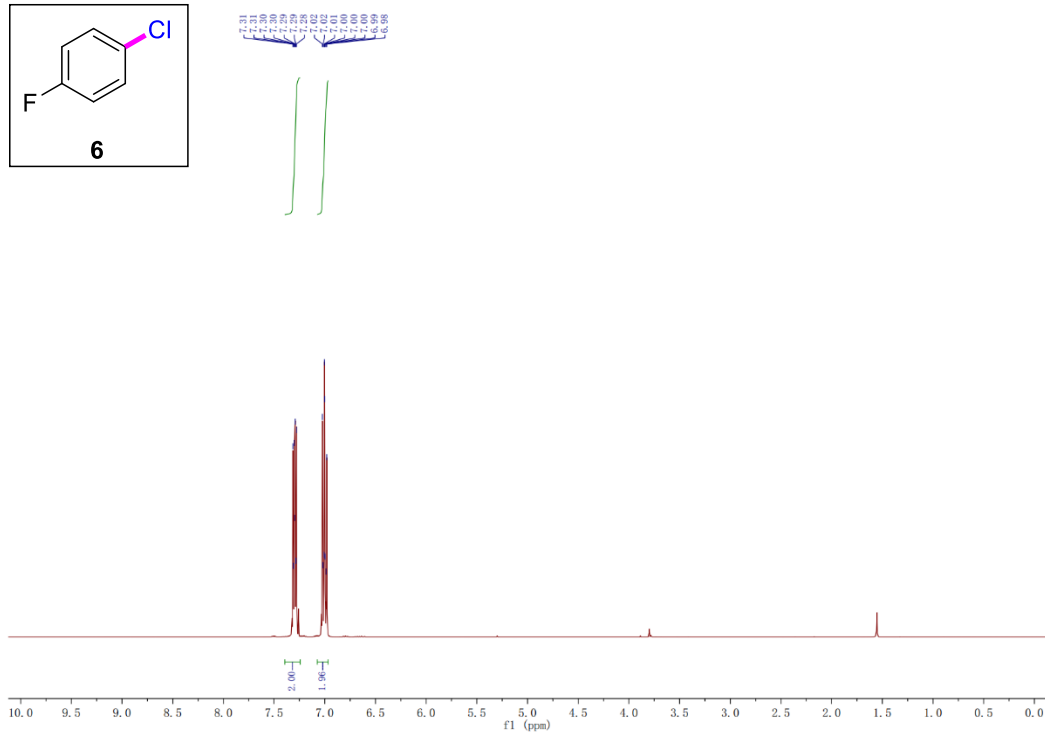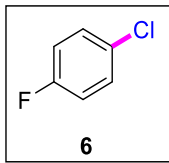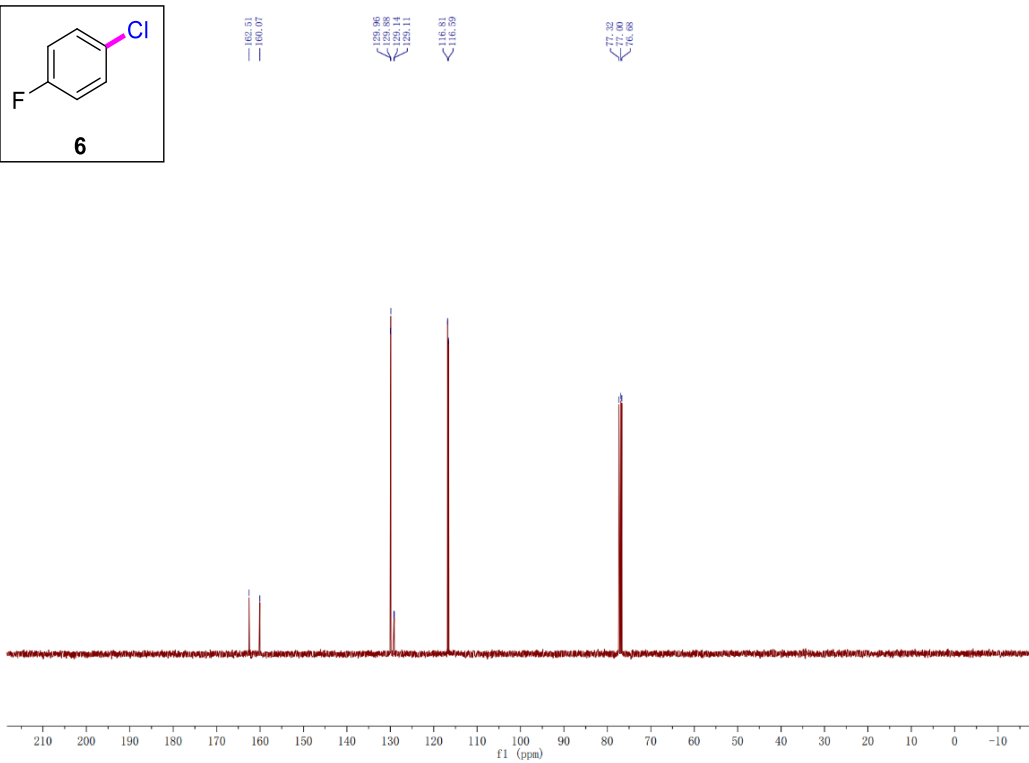



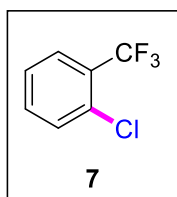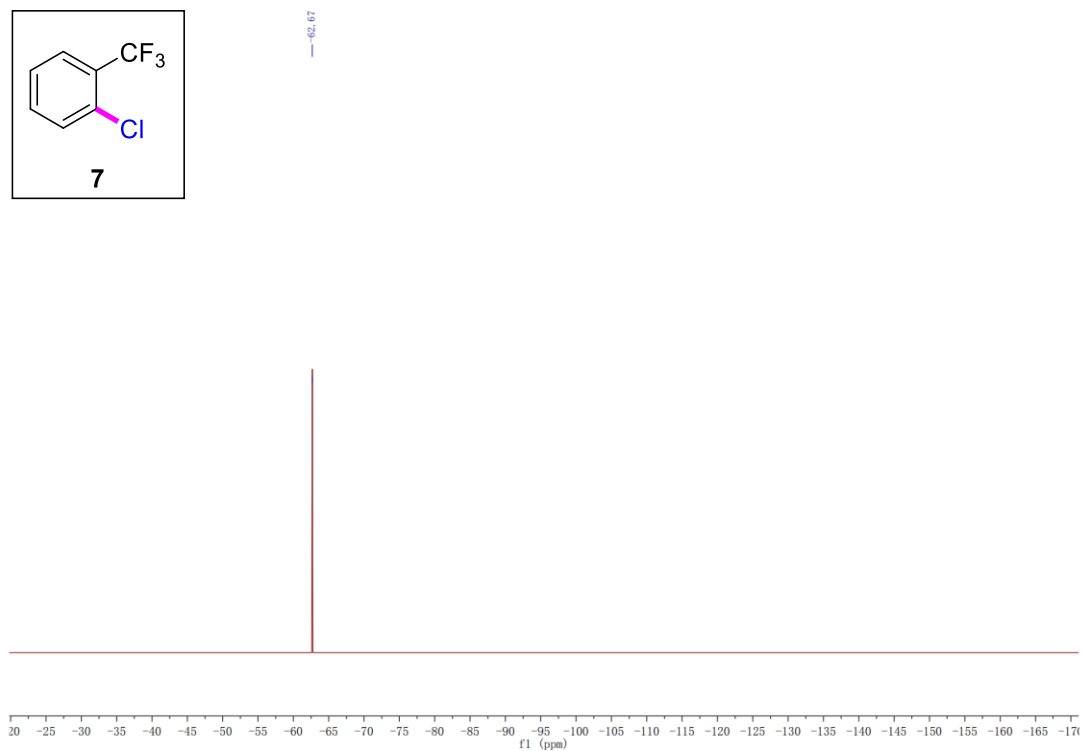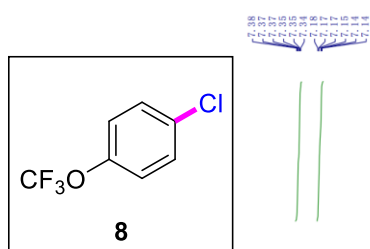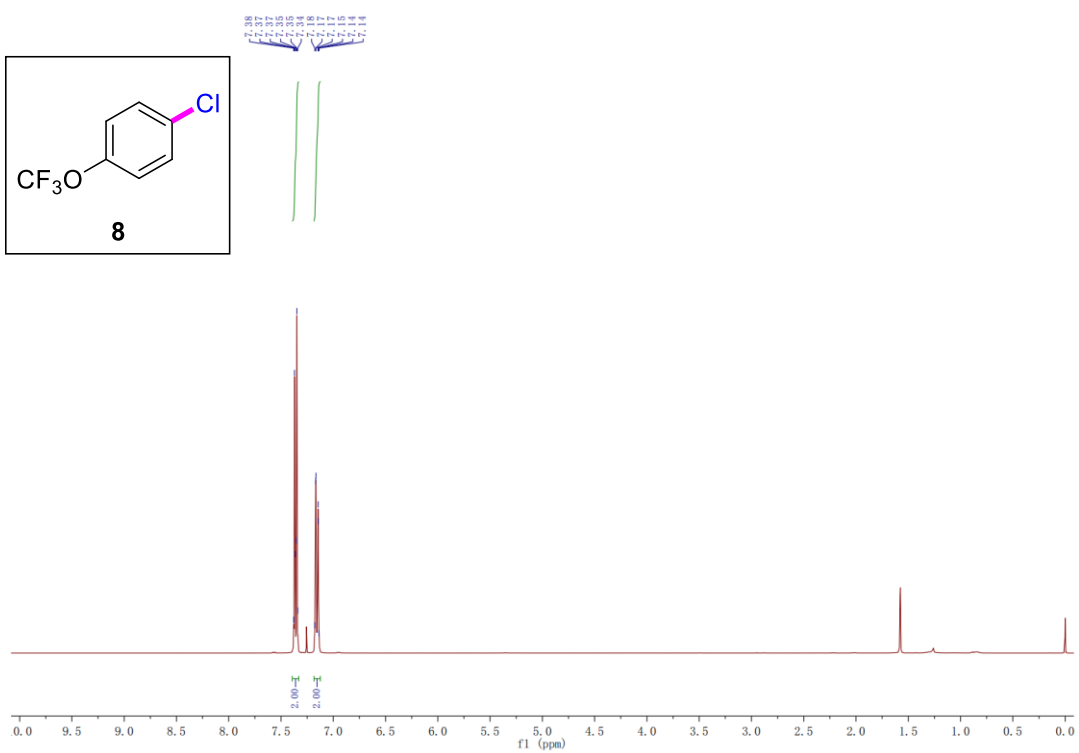

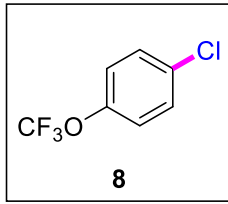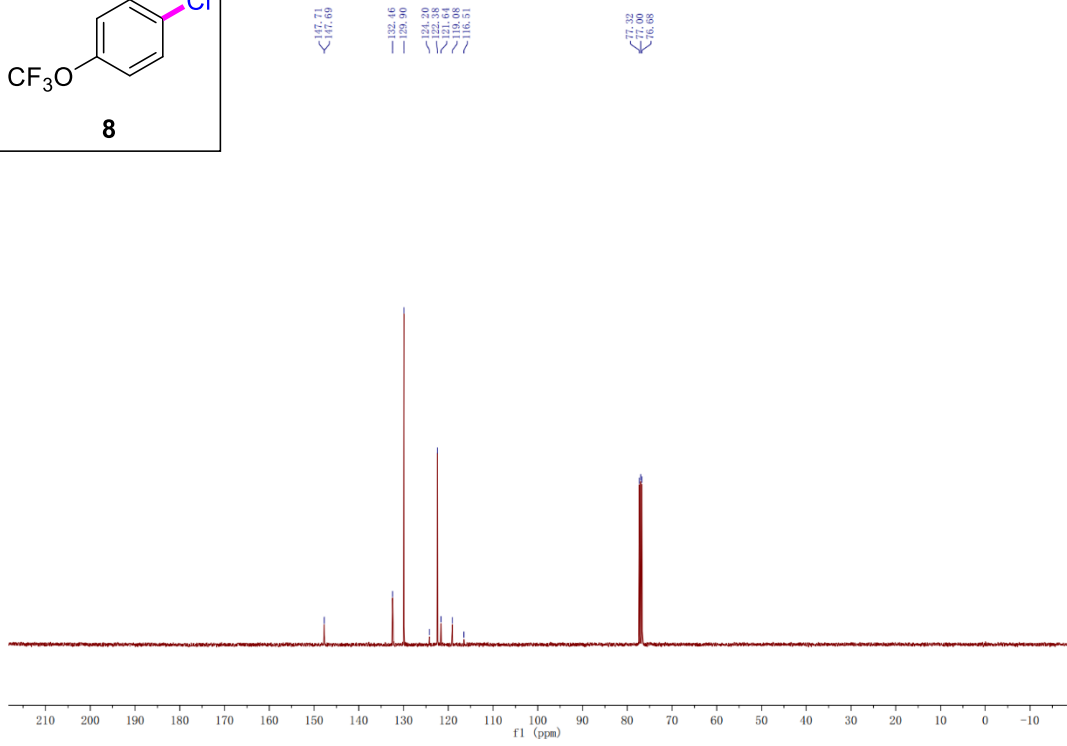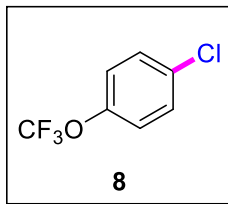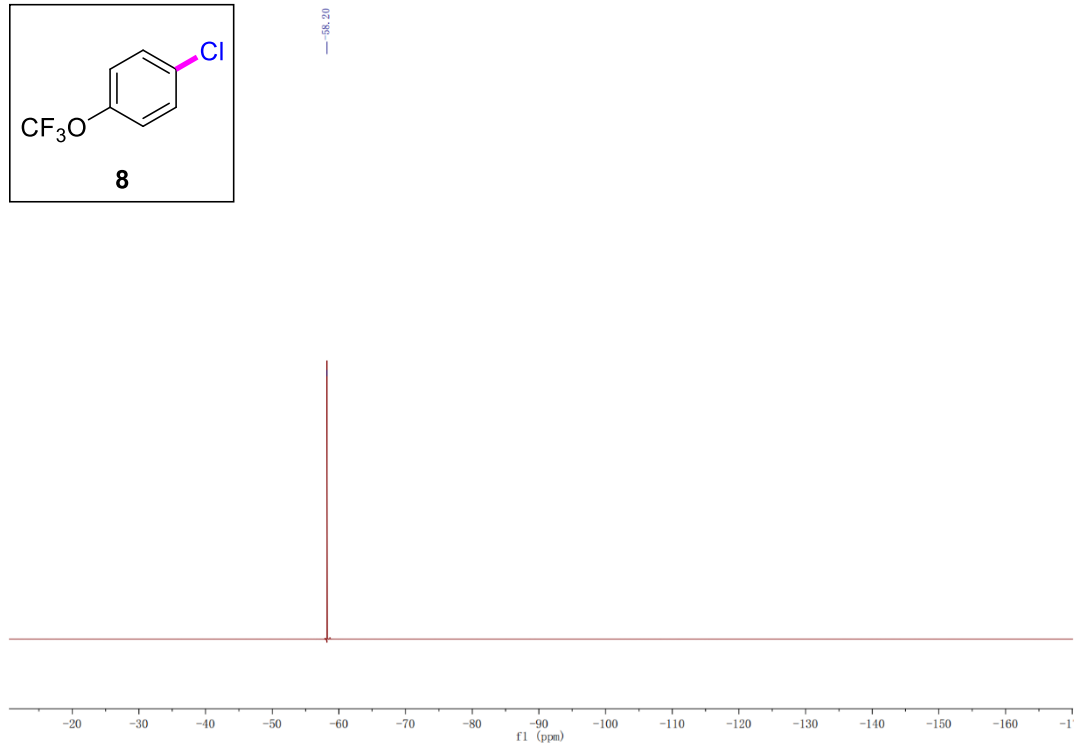





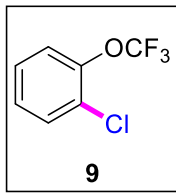

-57.91

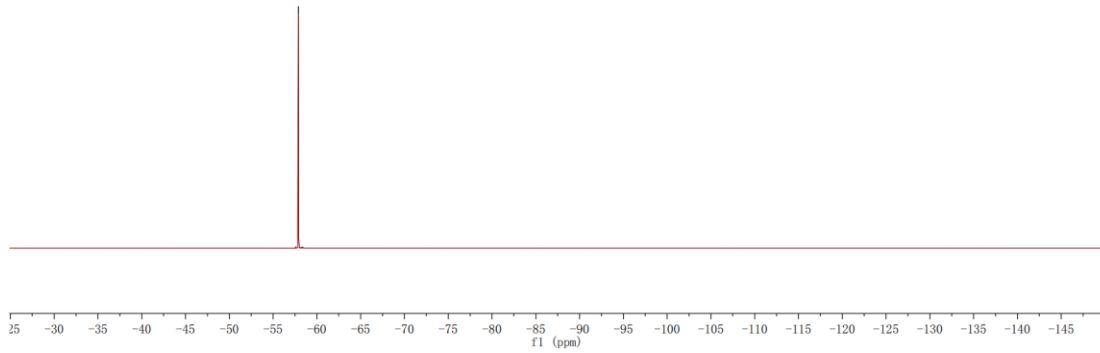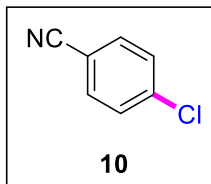

7.62  
7.61  
7.60  
7.59  
7.58  
7.57  
7.56  
7.55

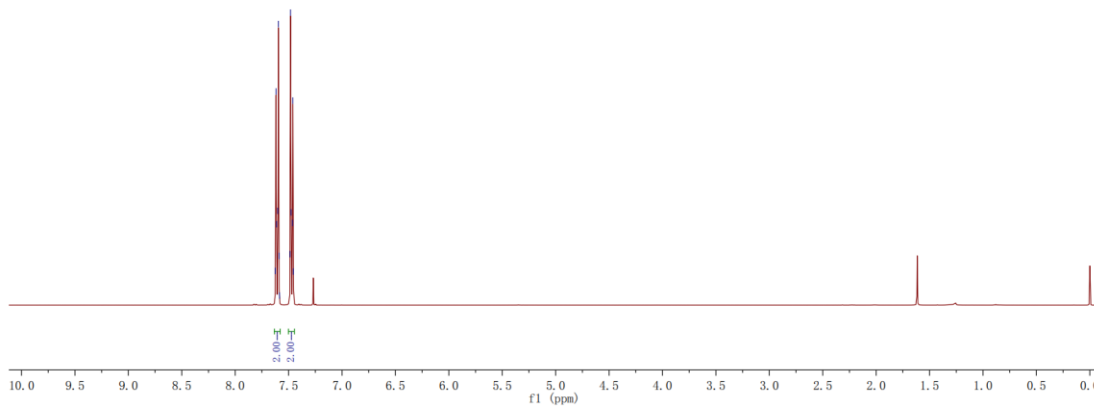

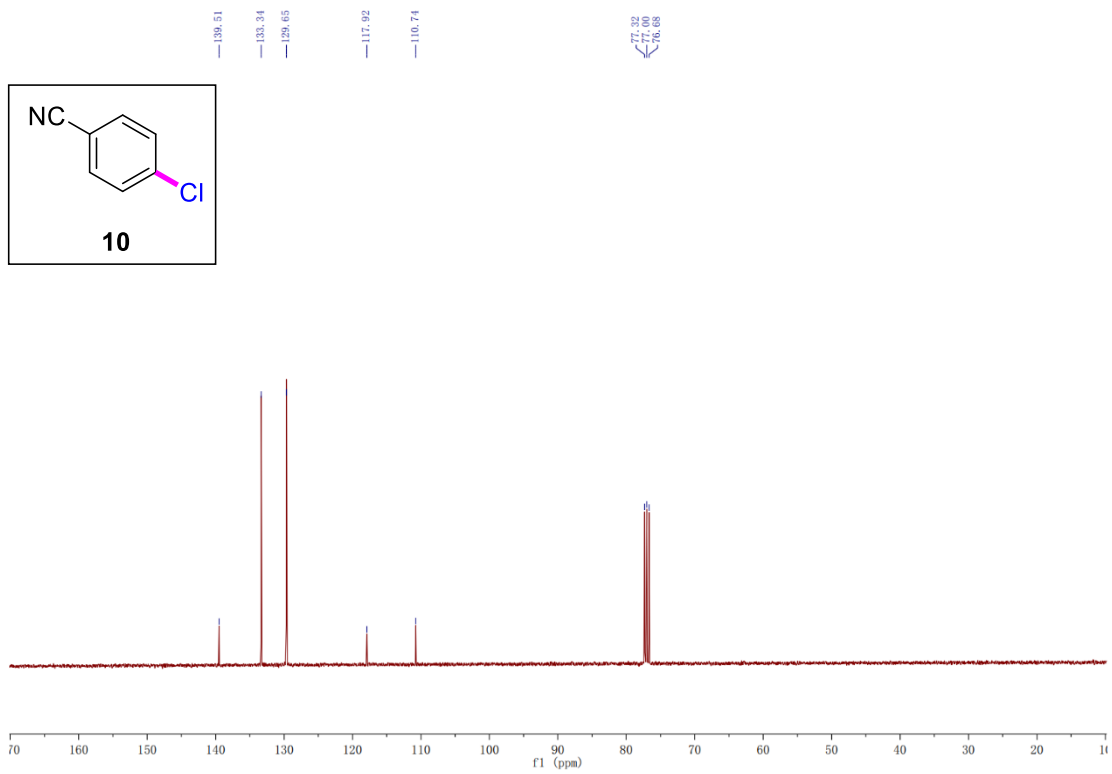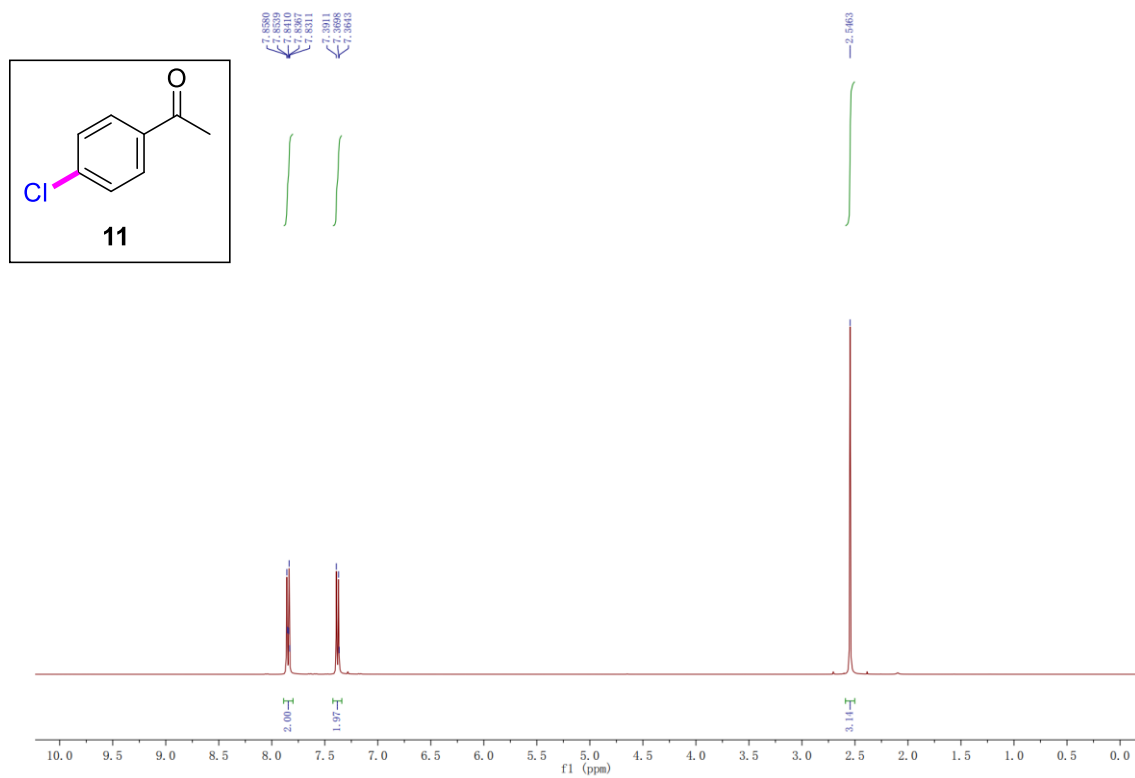

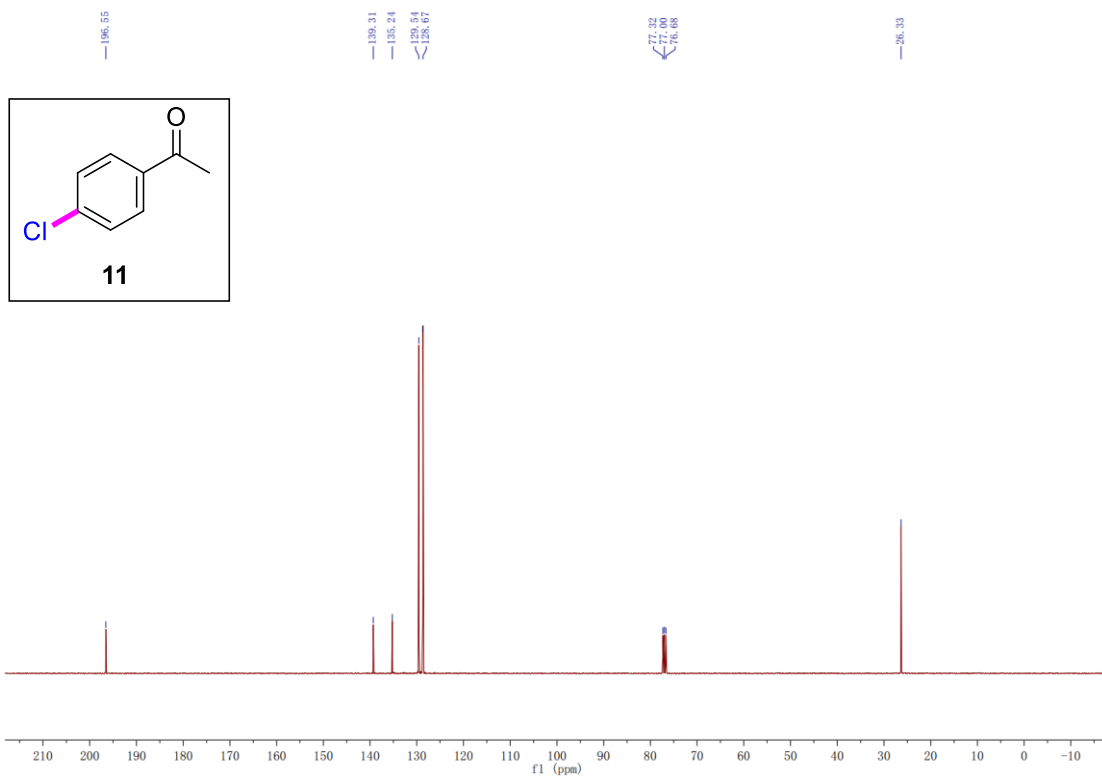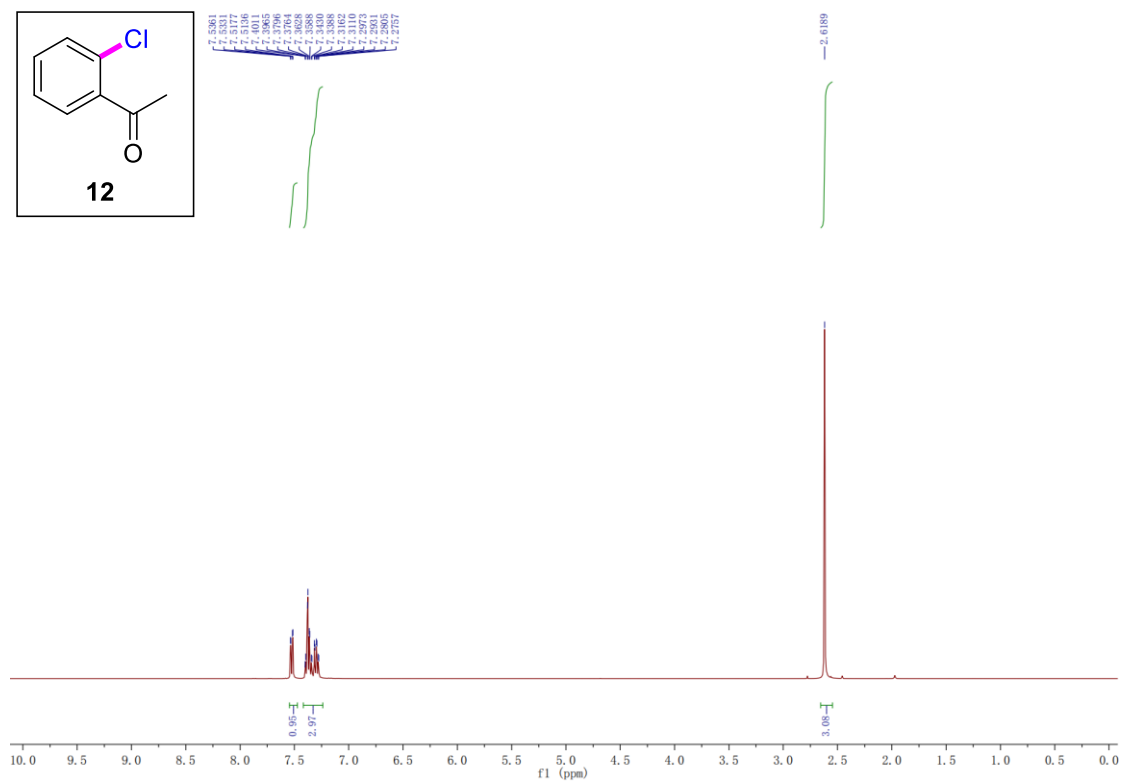

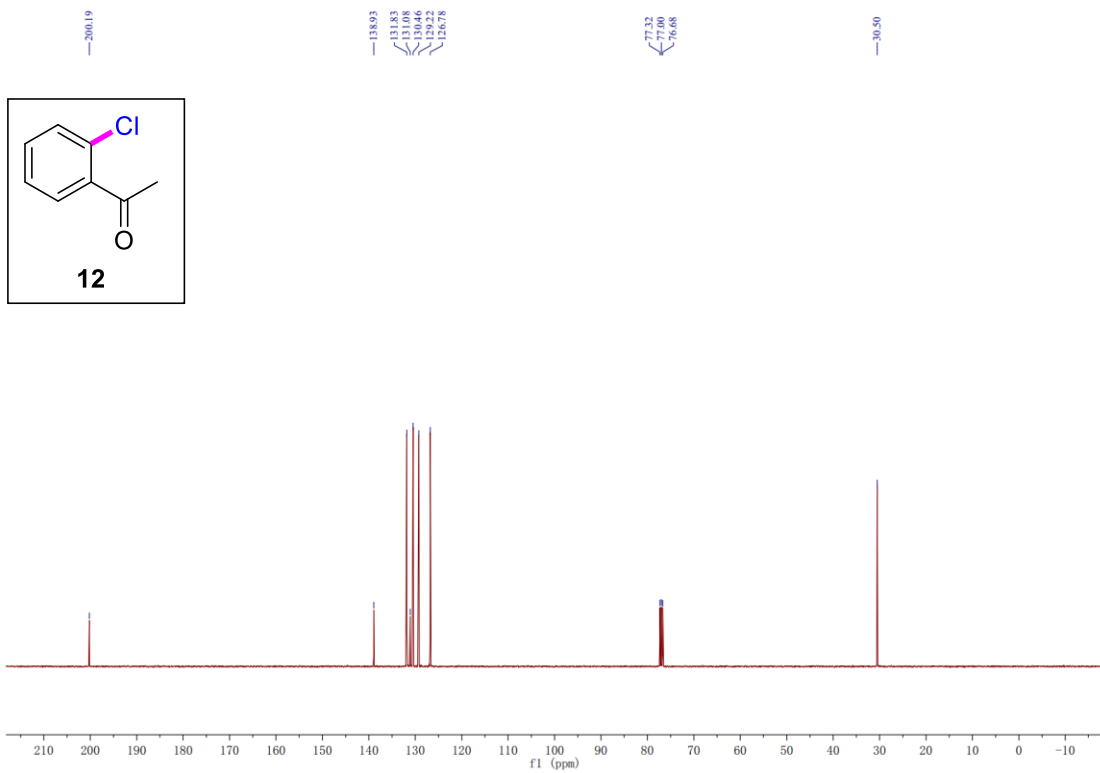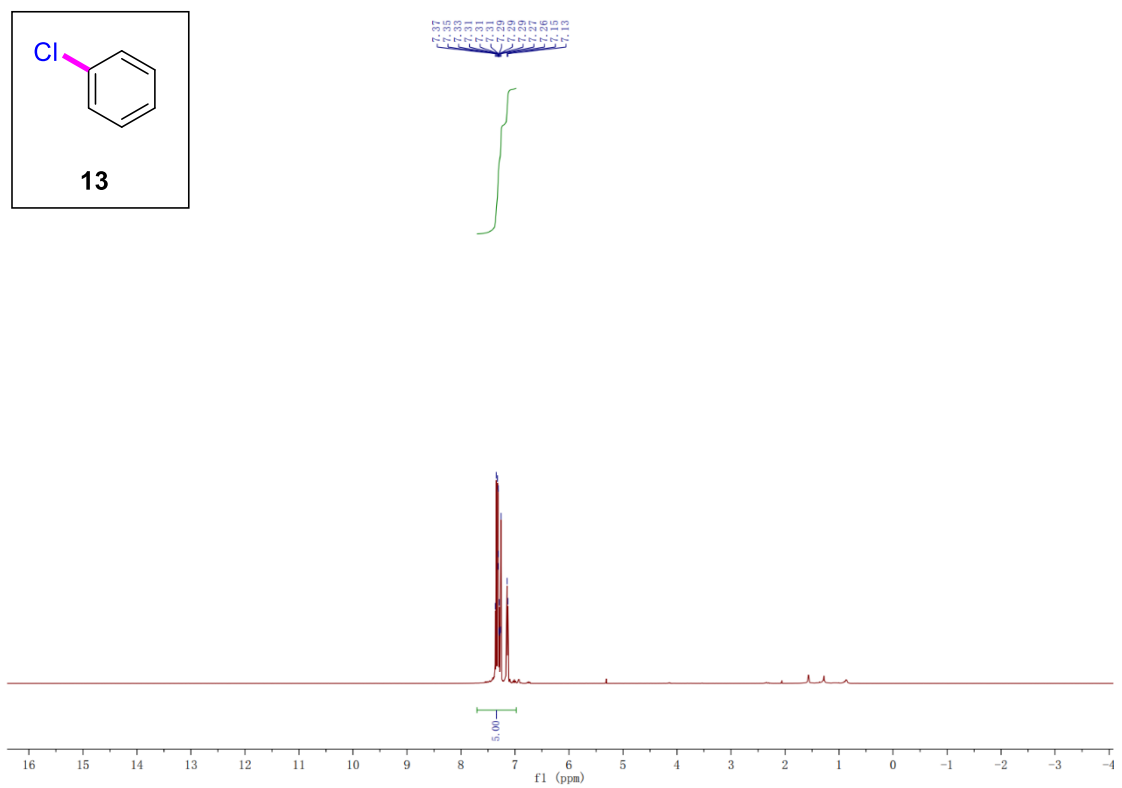

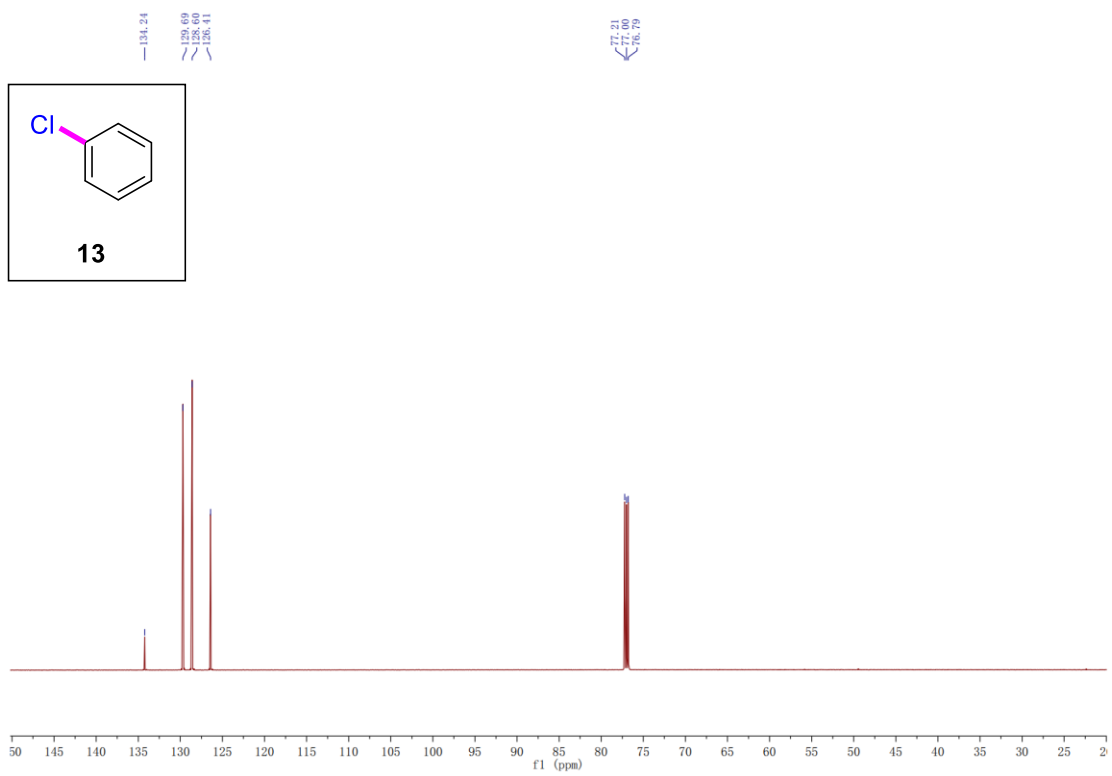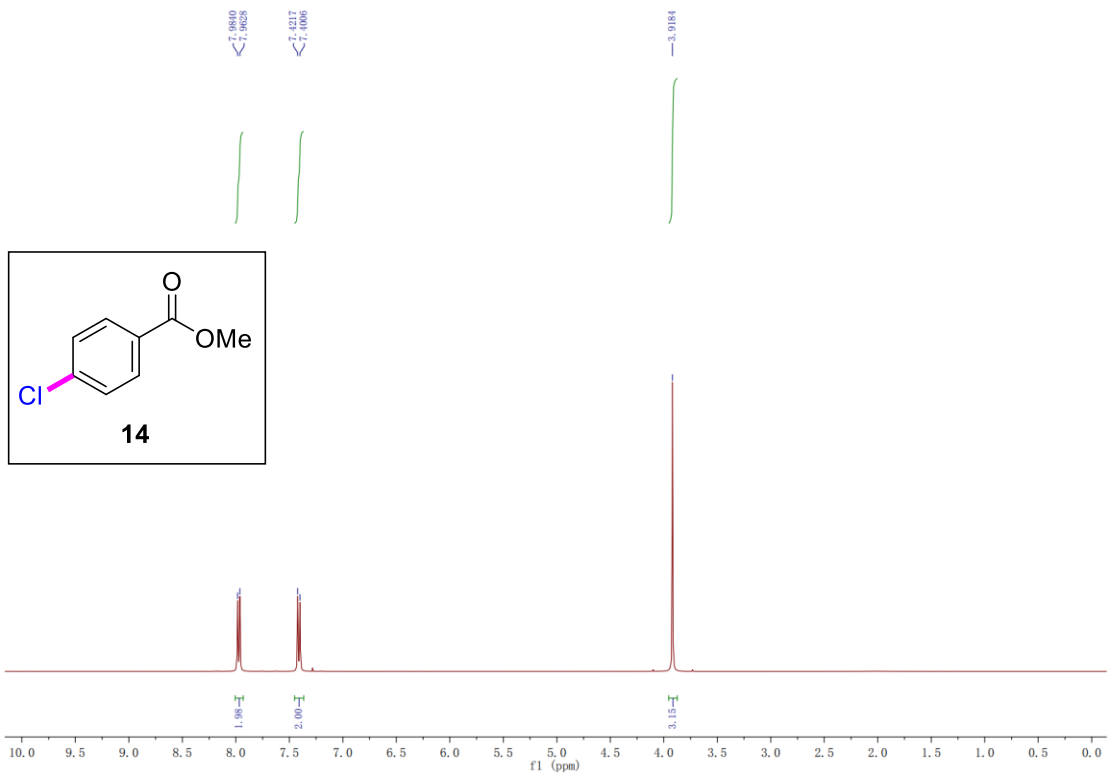

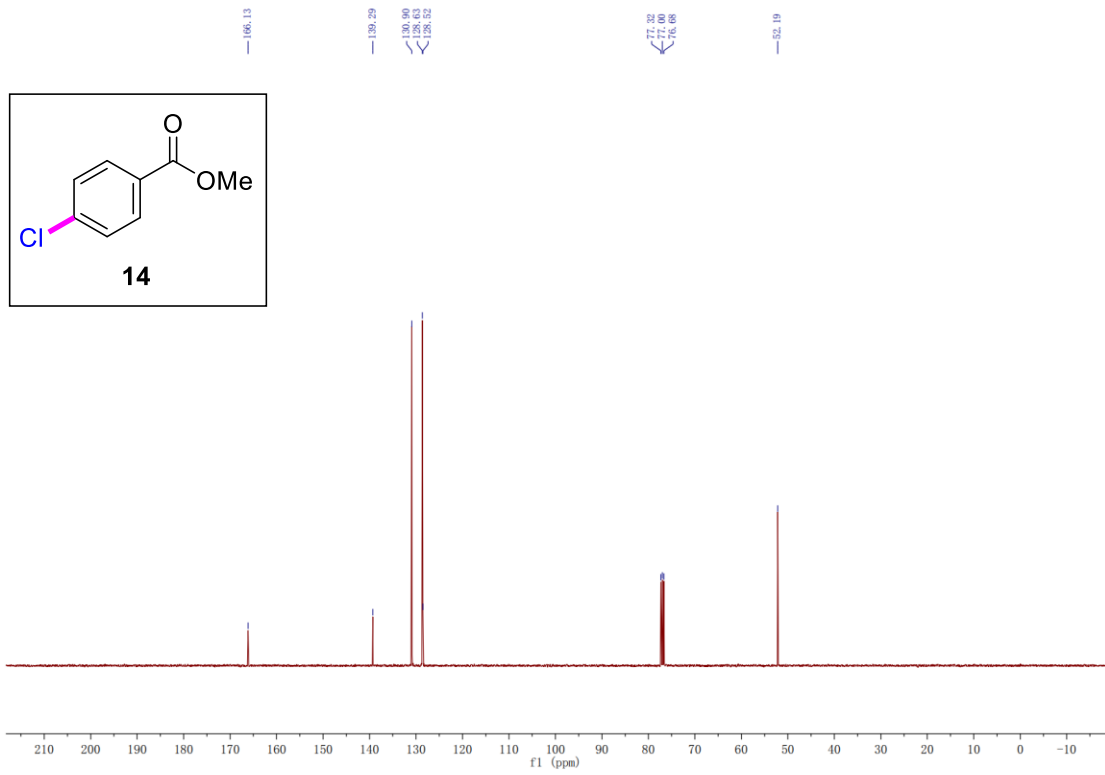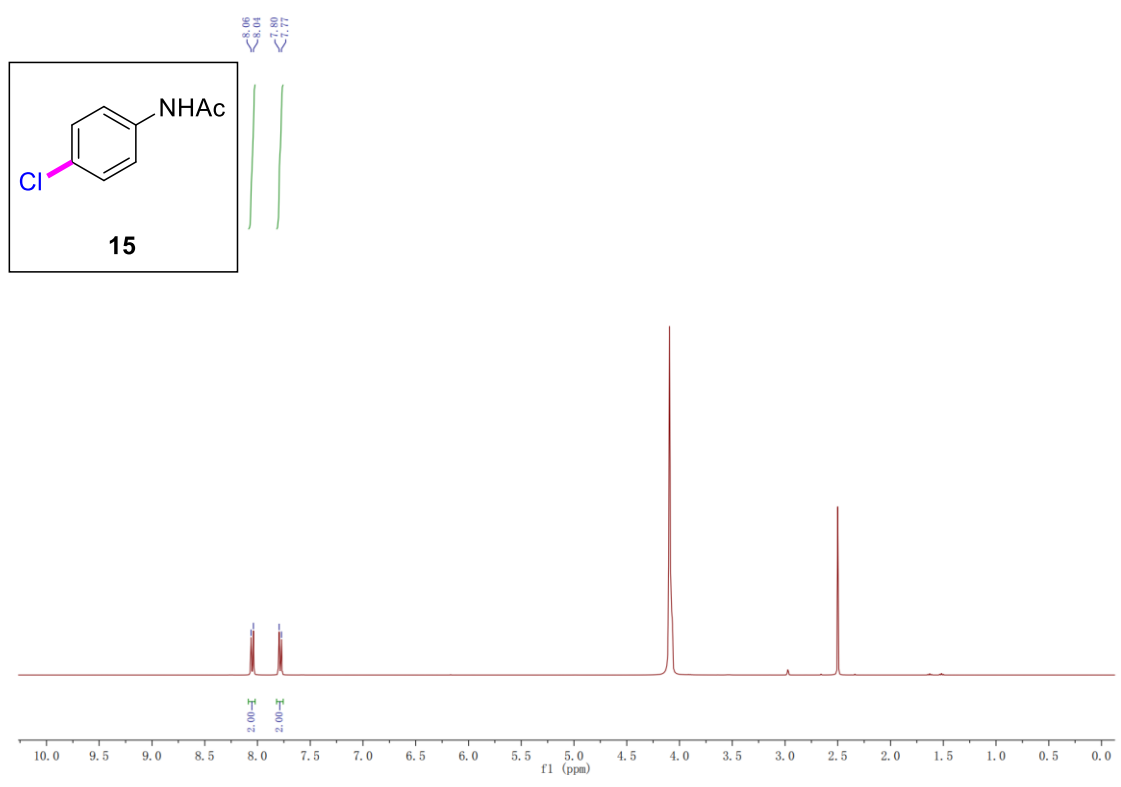

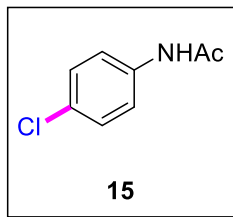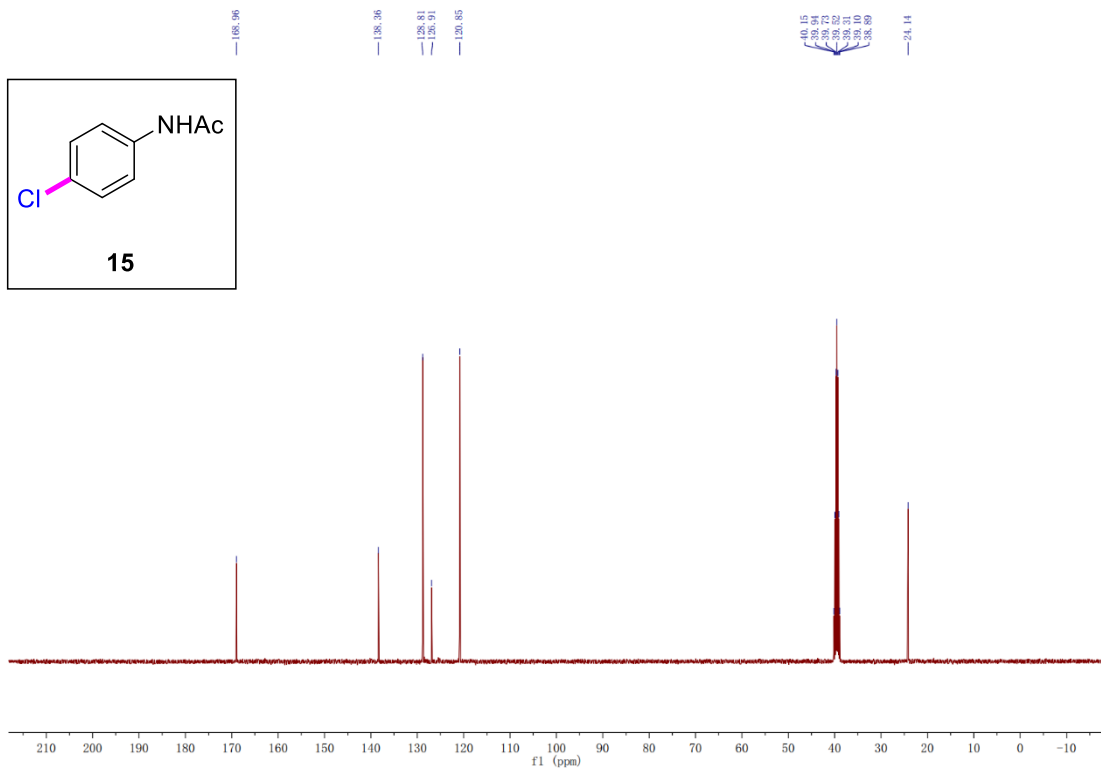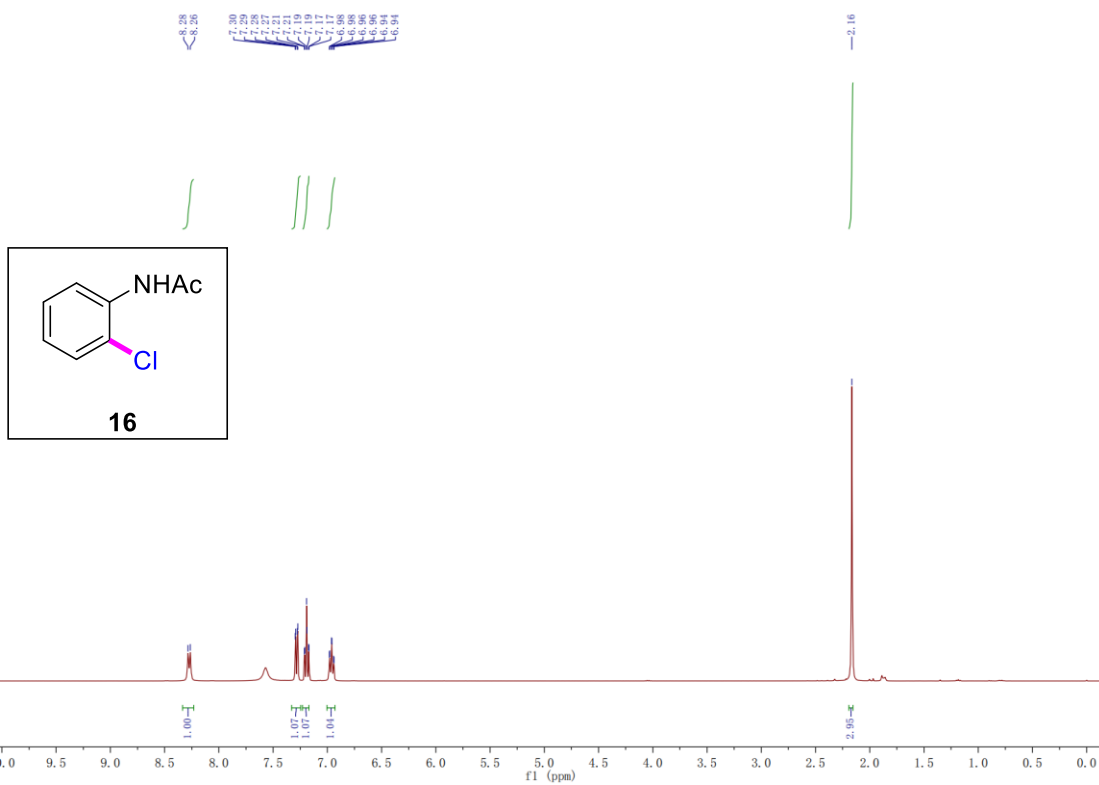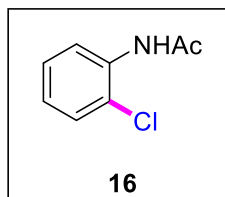



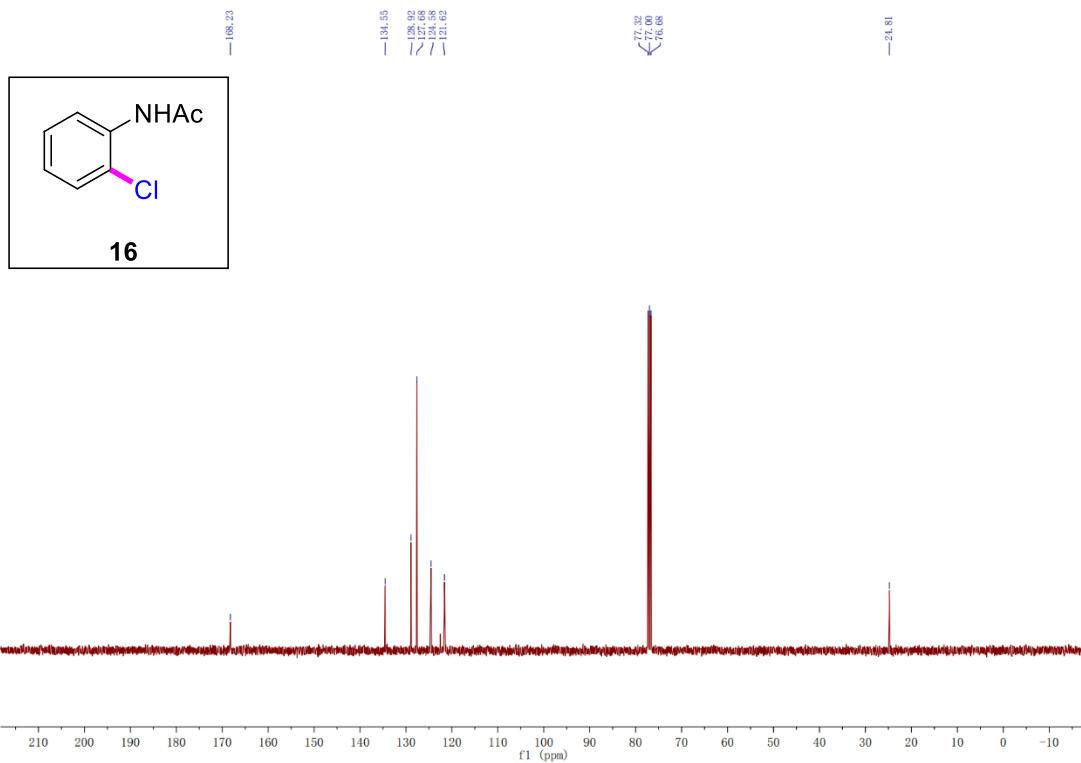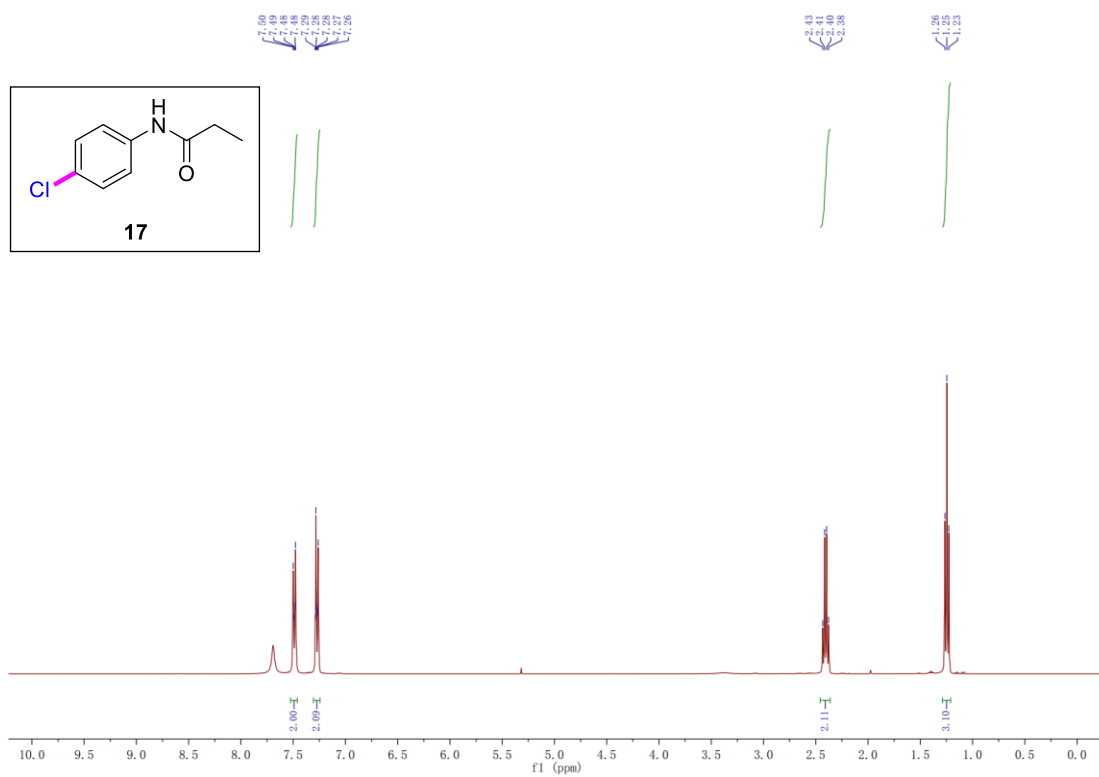

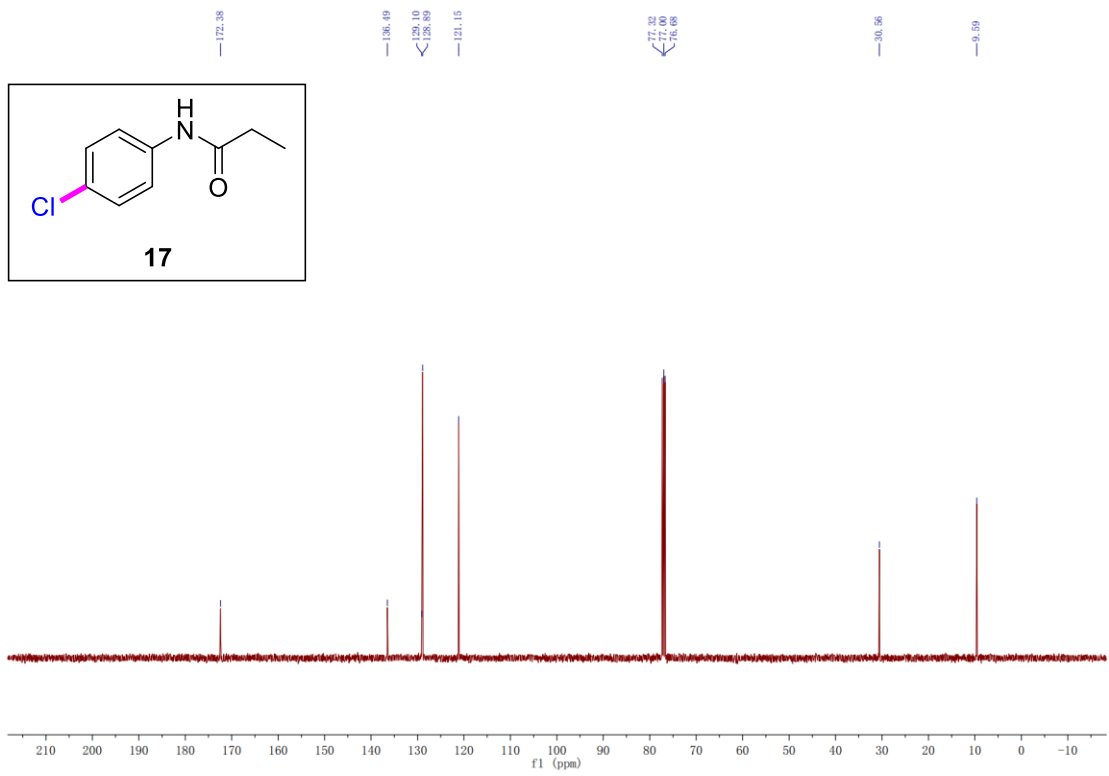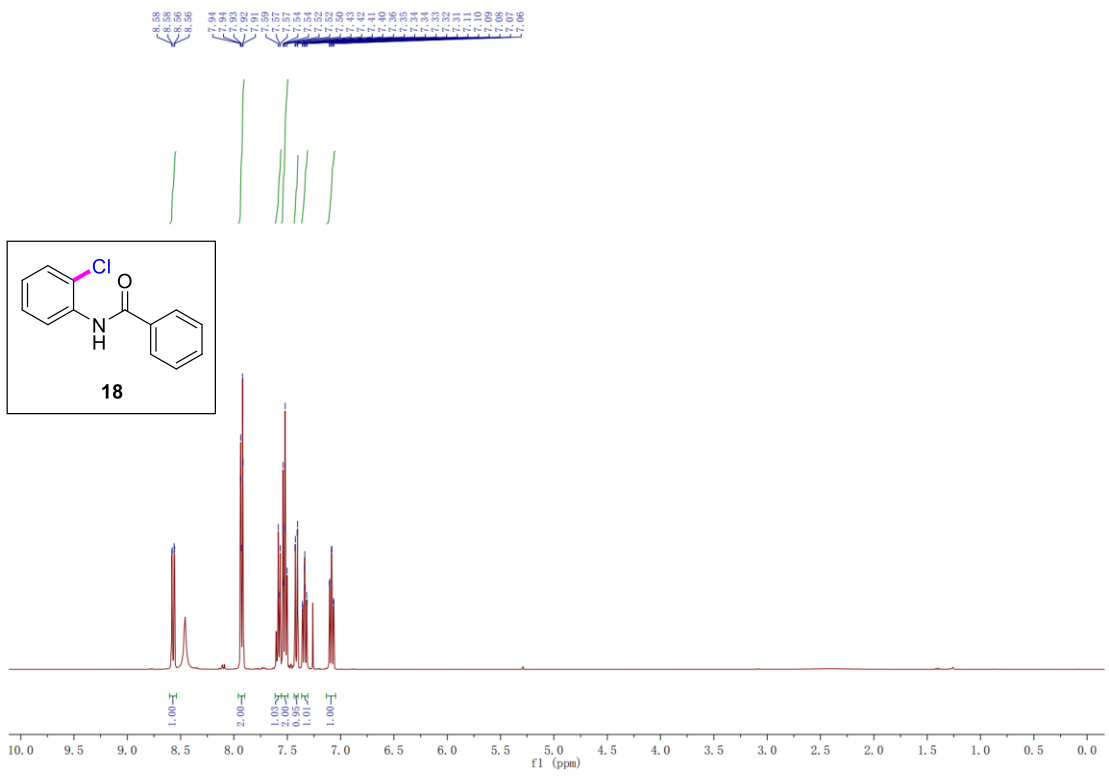

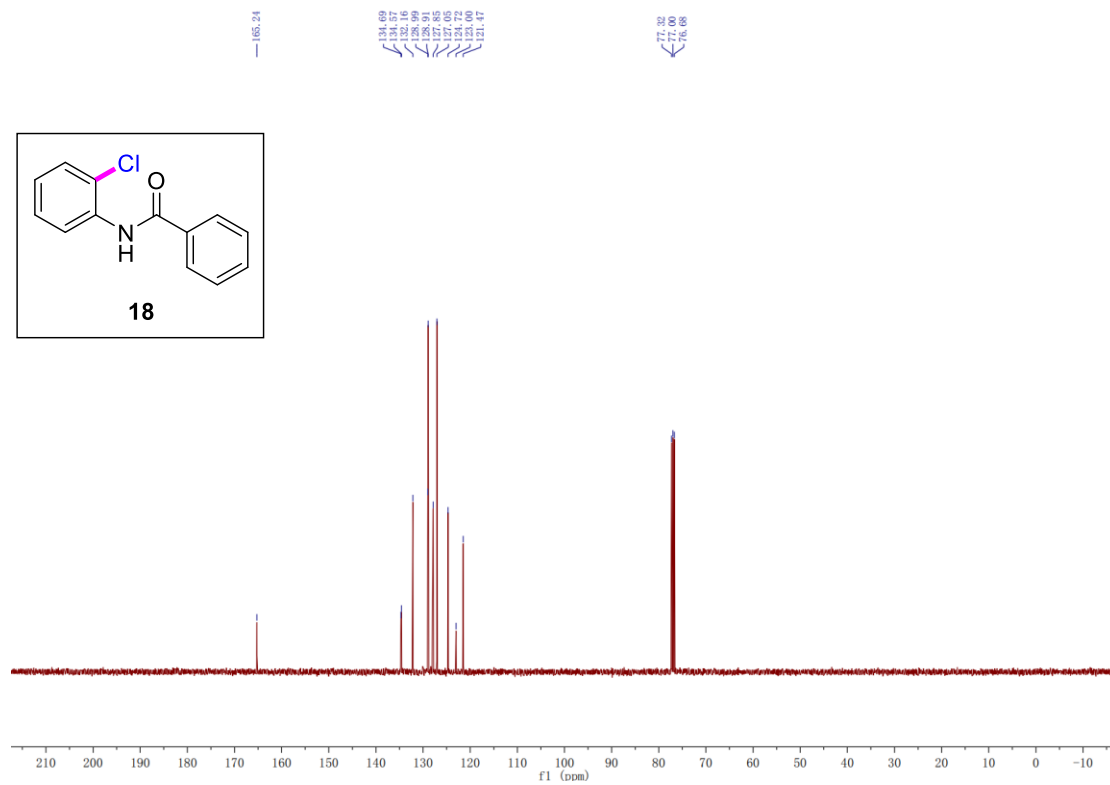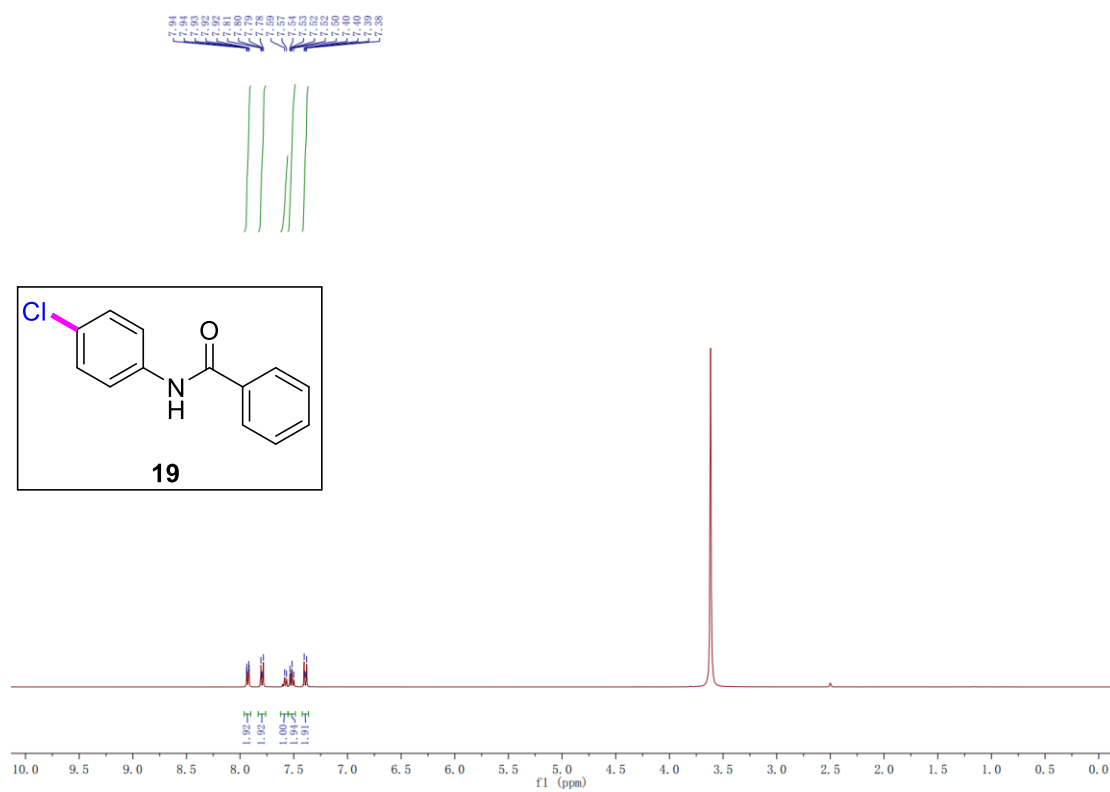

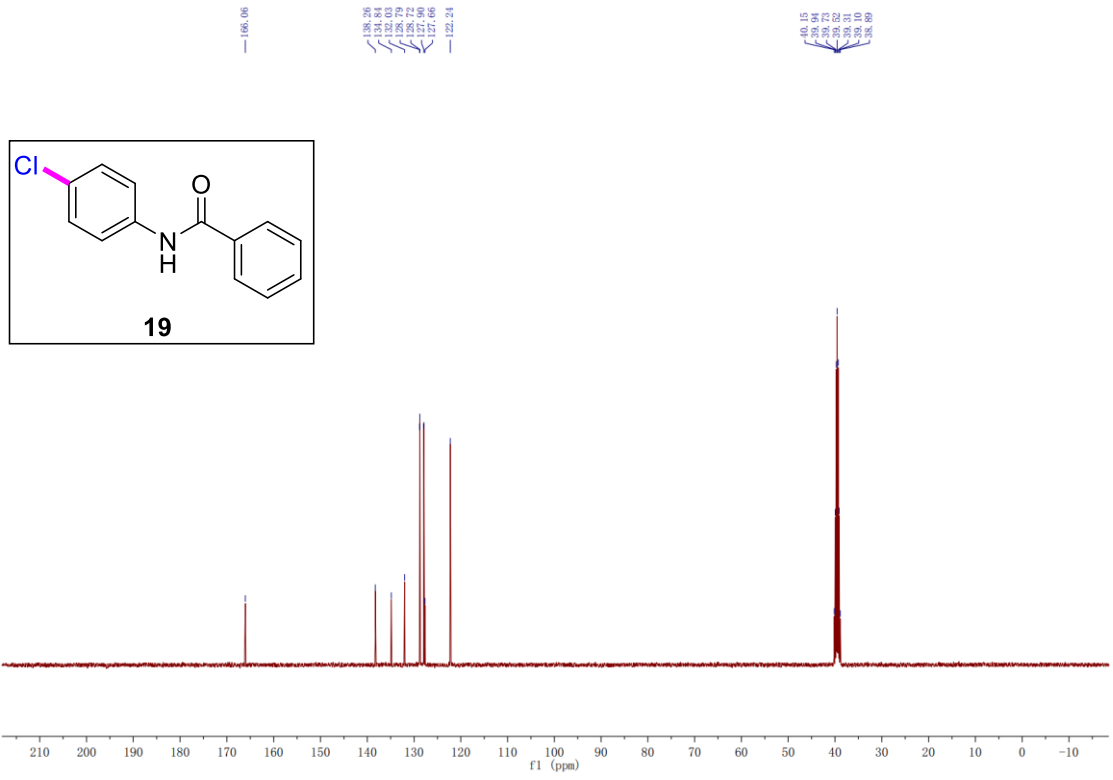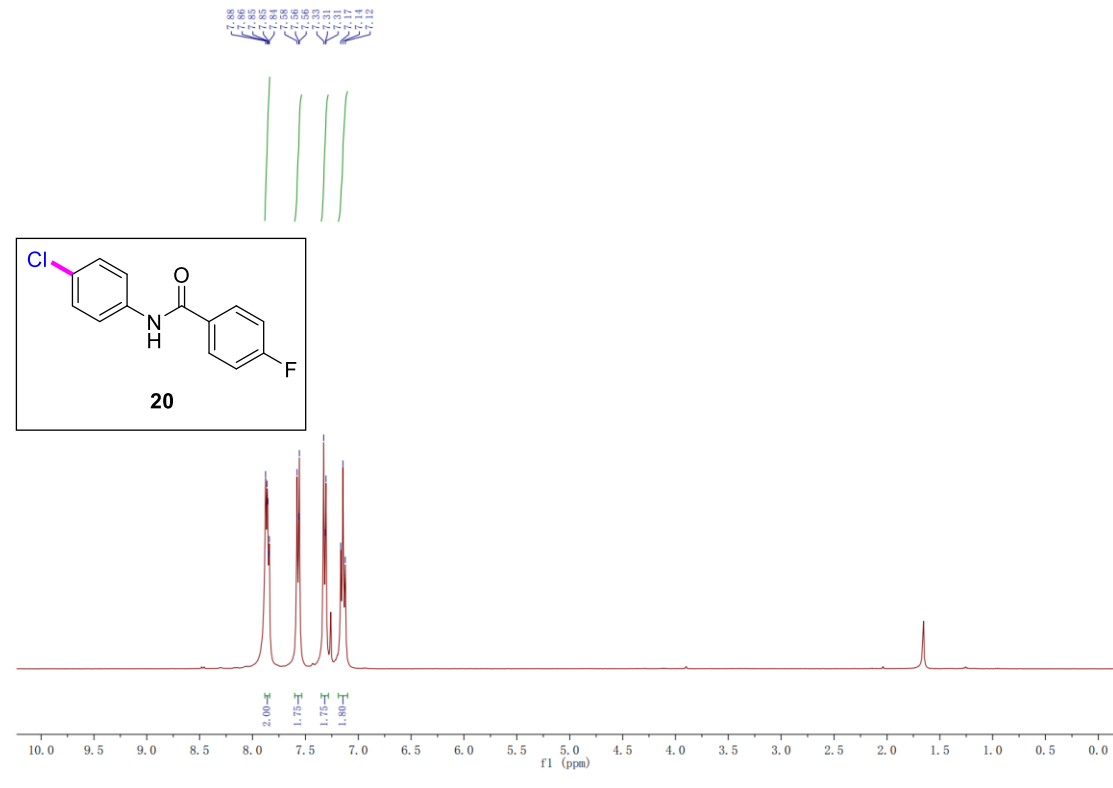

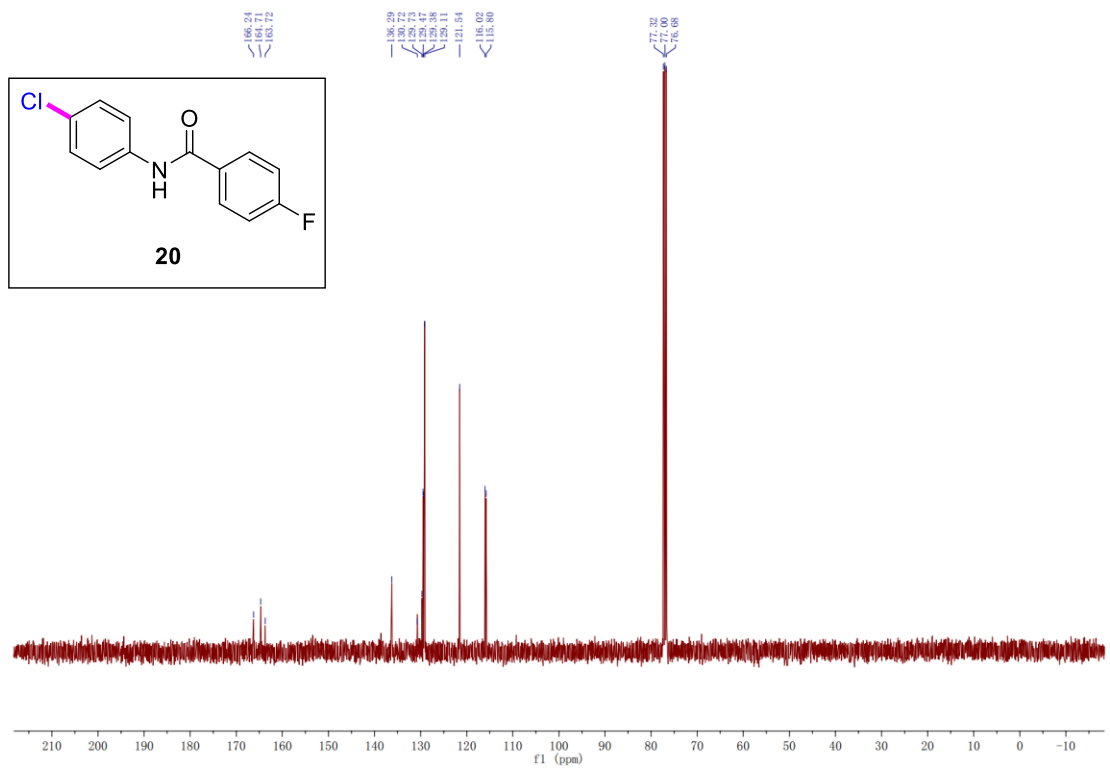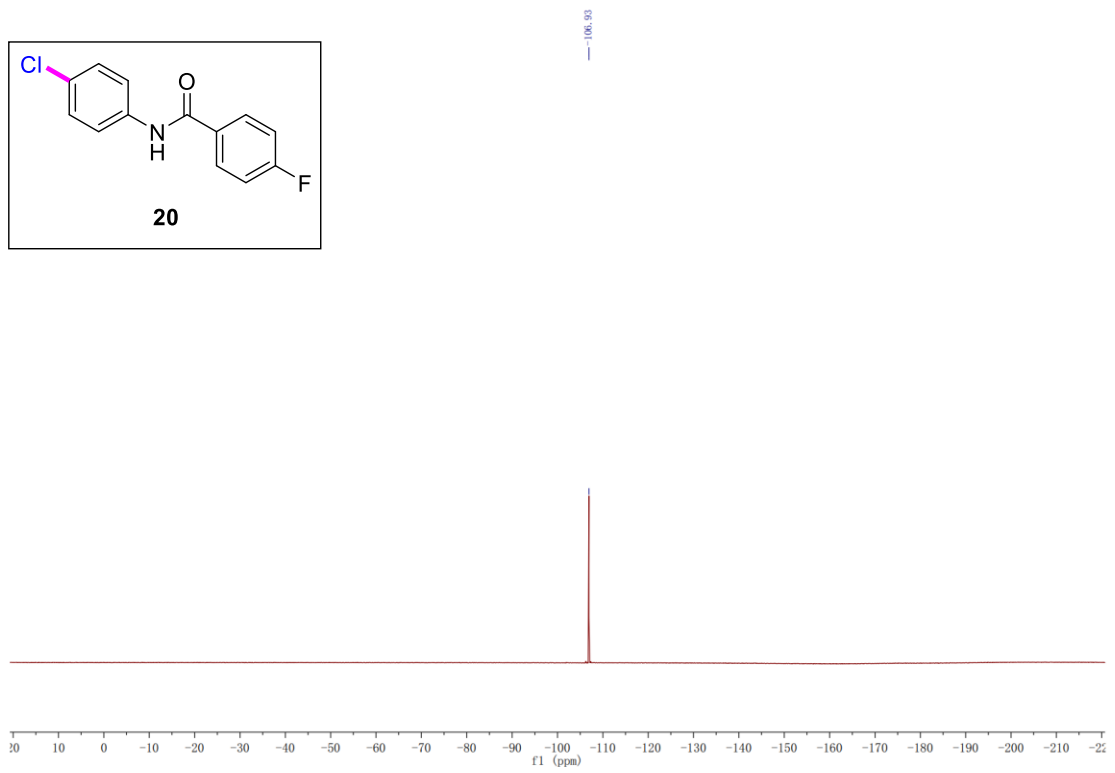

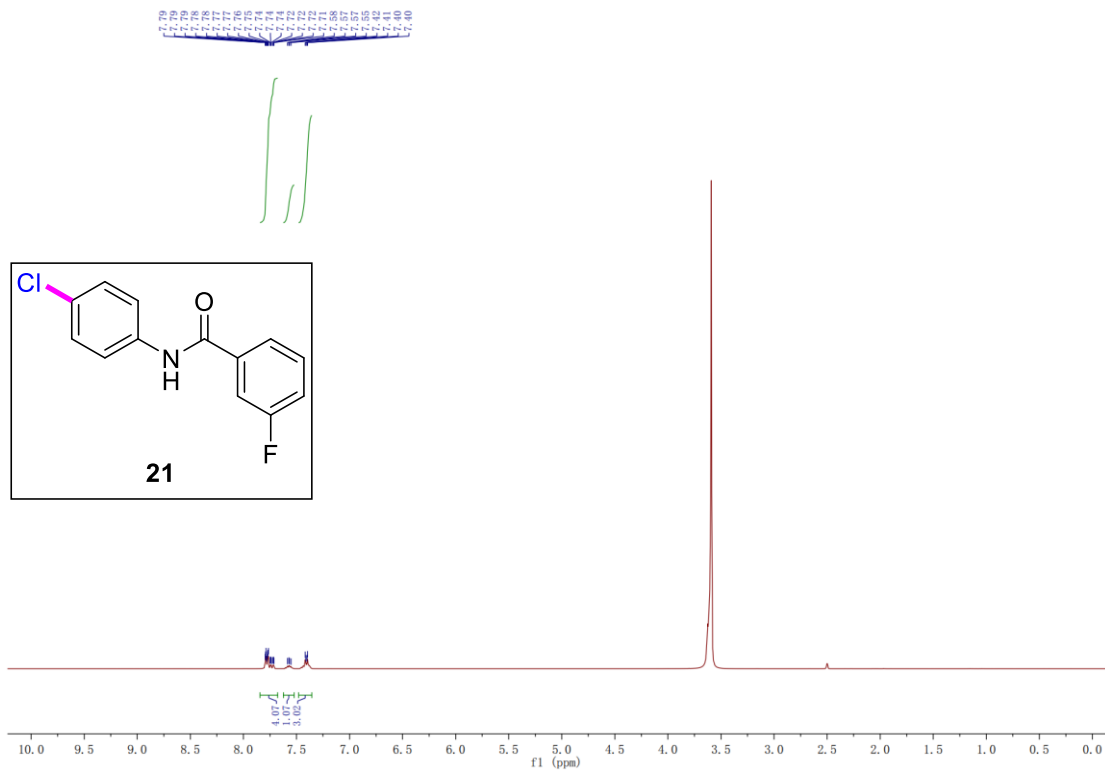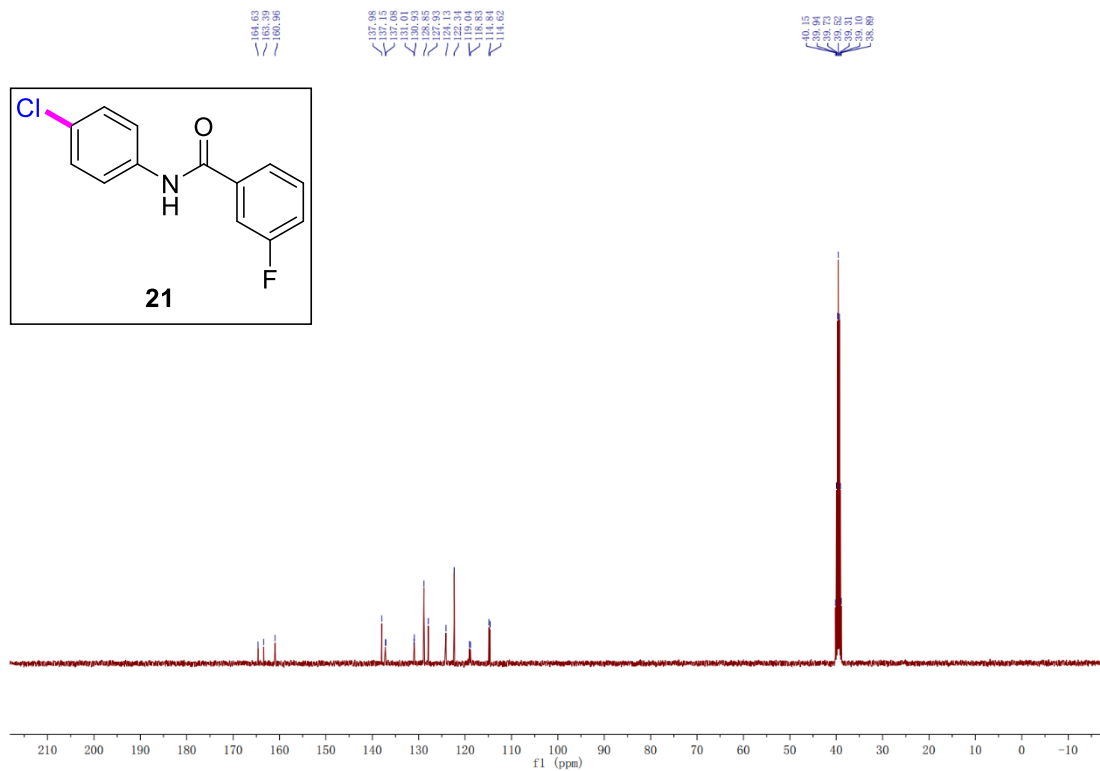

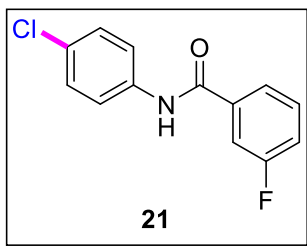

112.41  
112.43  
112.44  
112.45  
112.47  
112.48

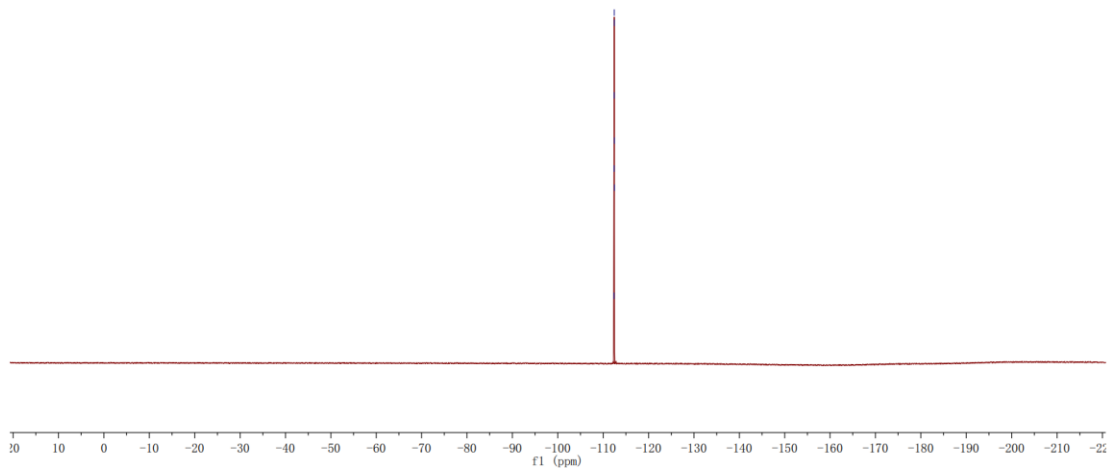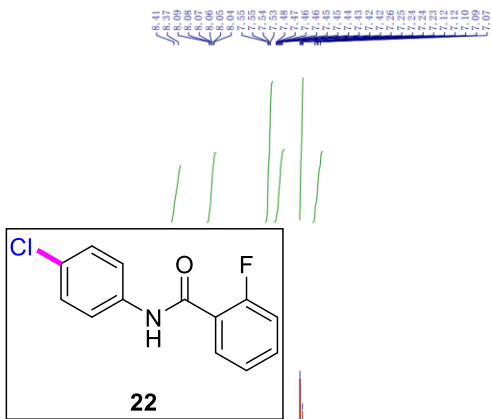

8.41  
8.37  
8.09  
8.07  
8.06  
8.04  
7.55  
7.53  
7.54  
7.47  
7.46  
7.45  
7.45  
7.43  
7.42  
7.36  
7.25  
7.24  
7.23  
7.22  
7.10  
7.09

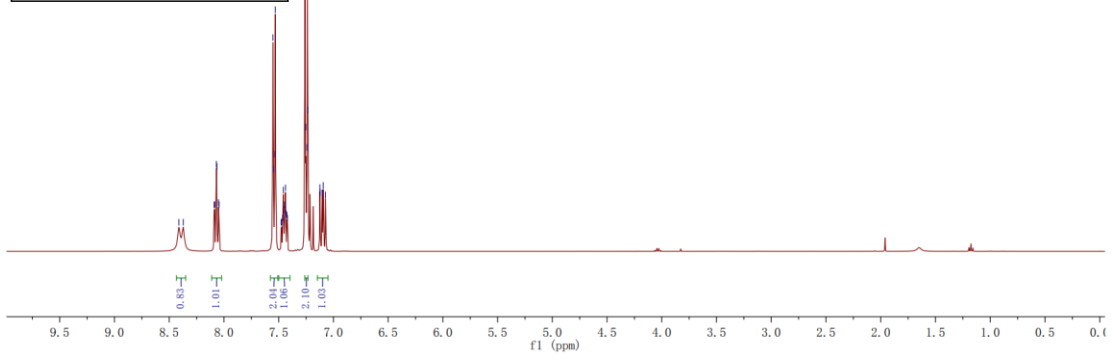

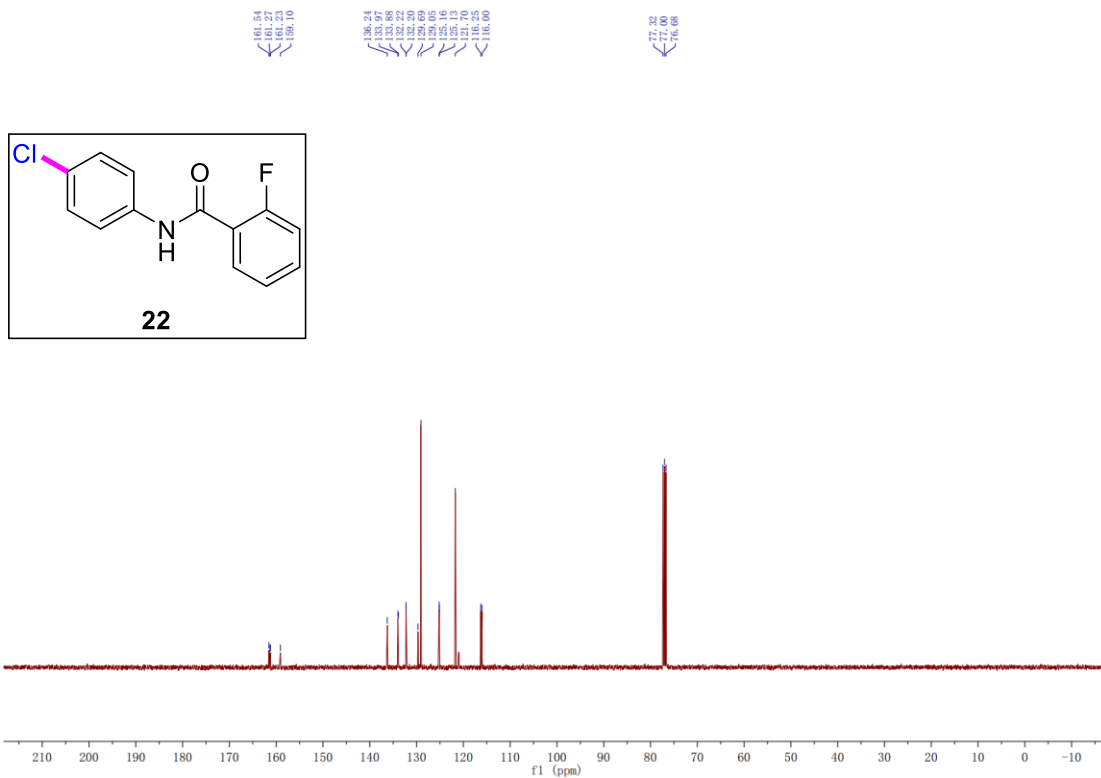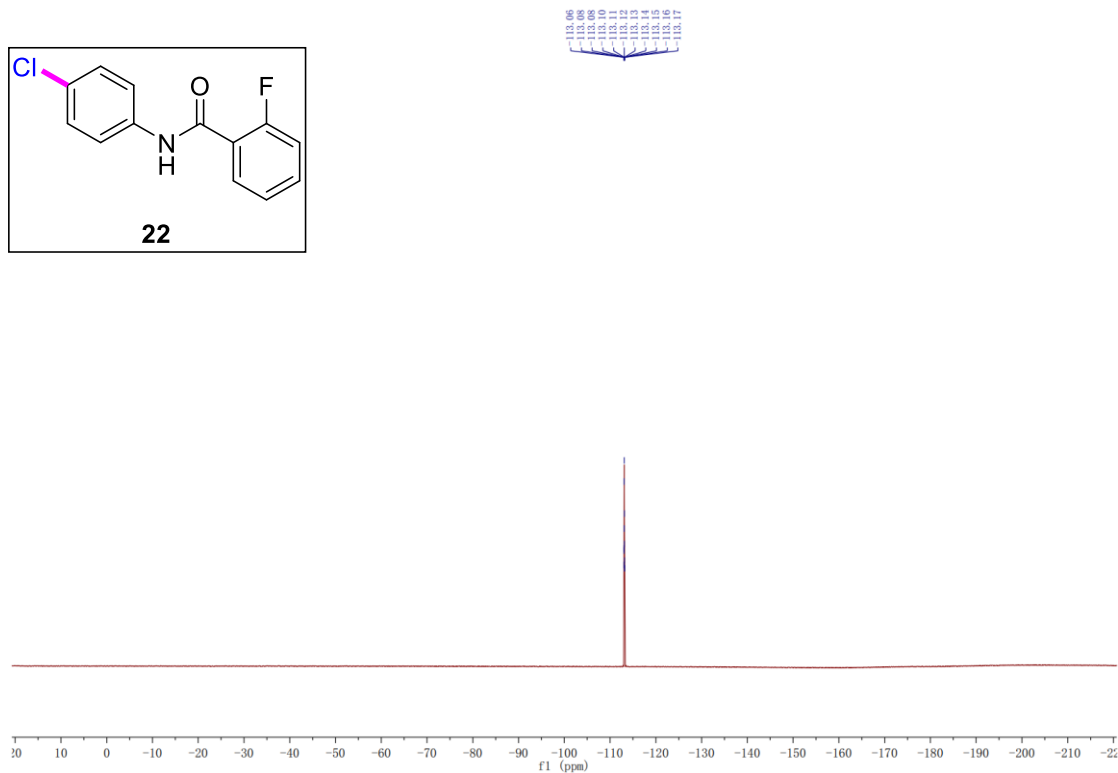



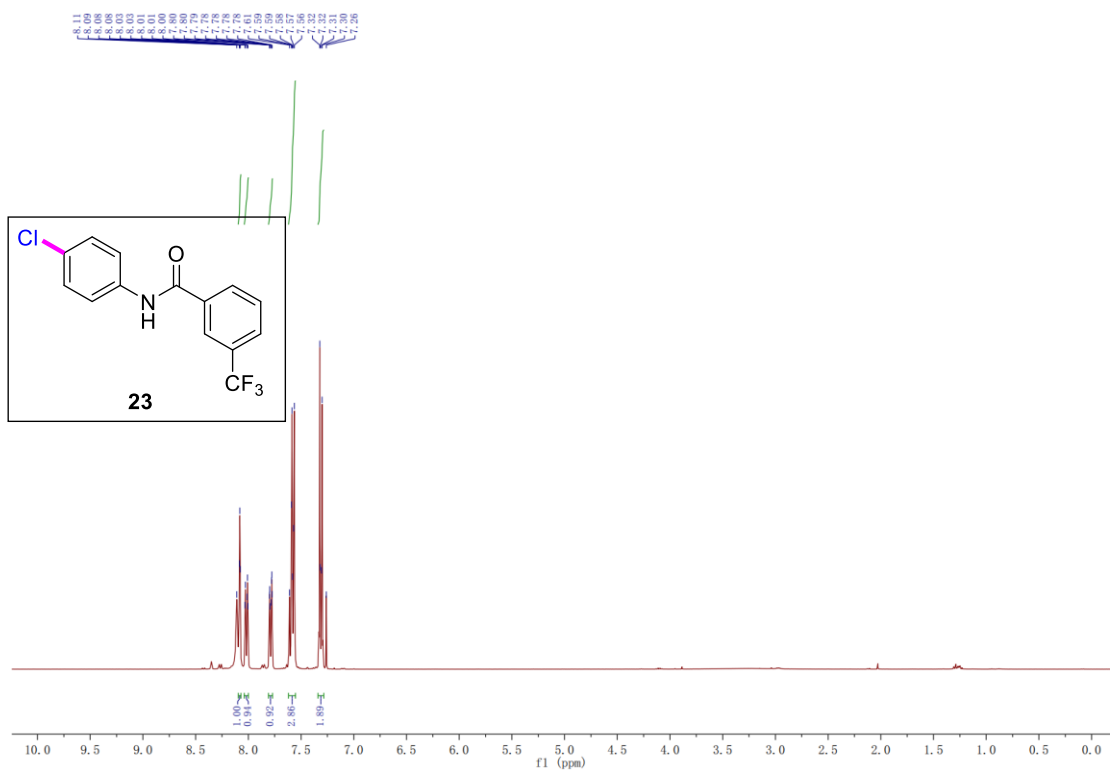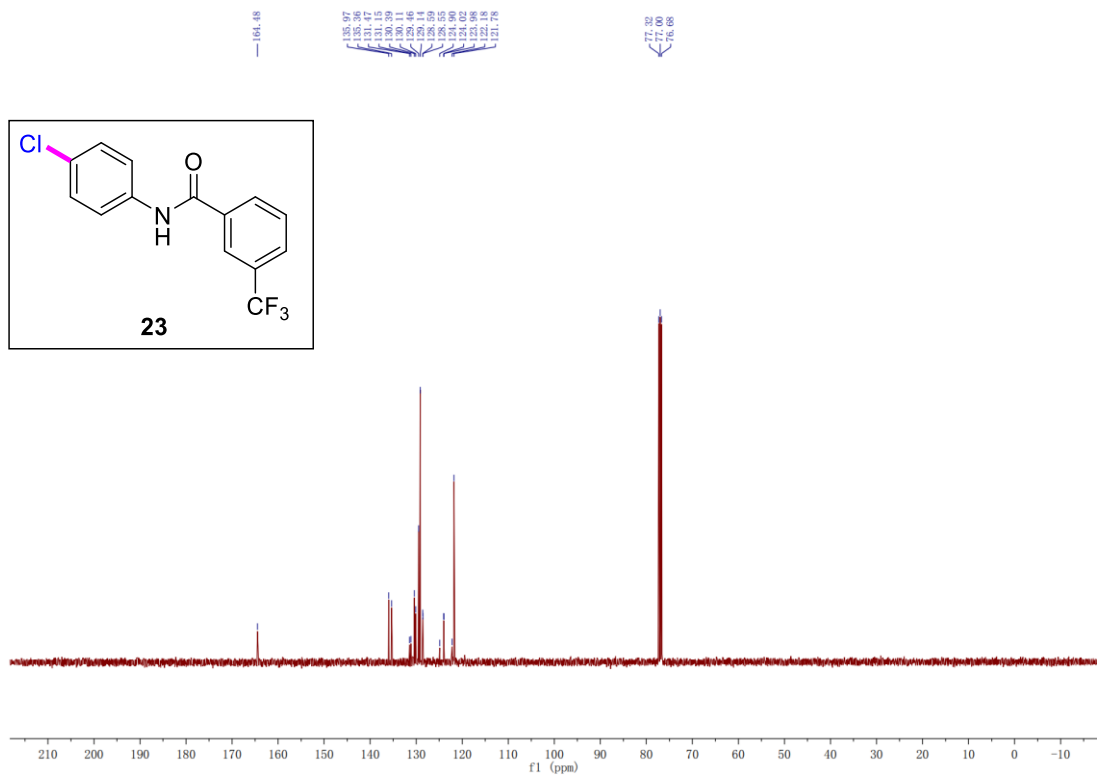

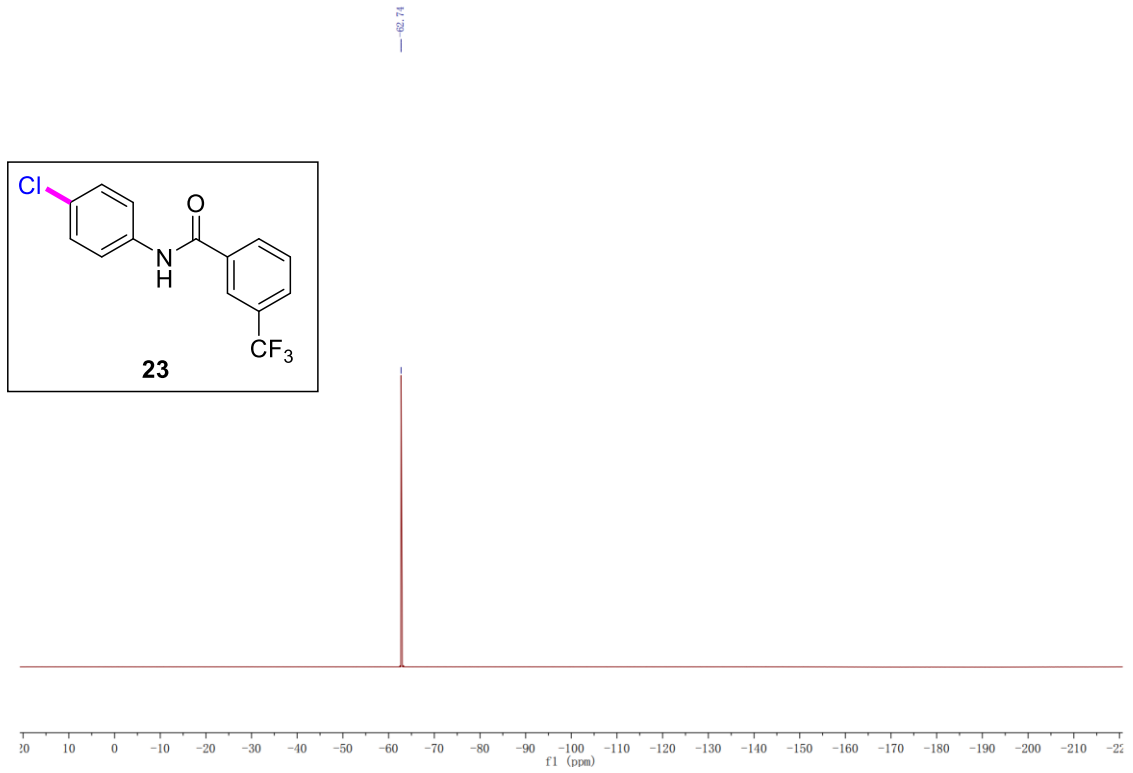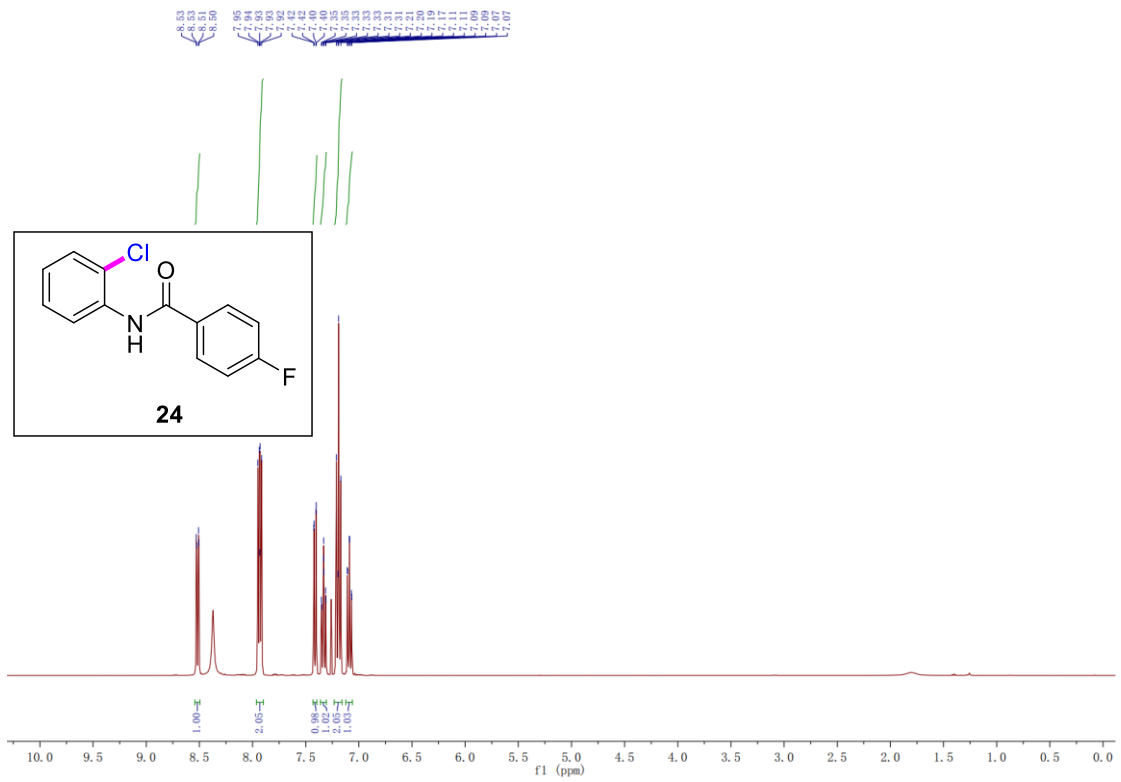

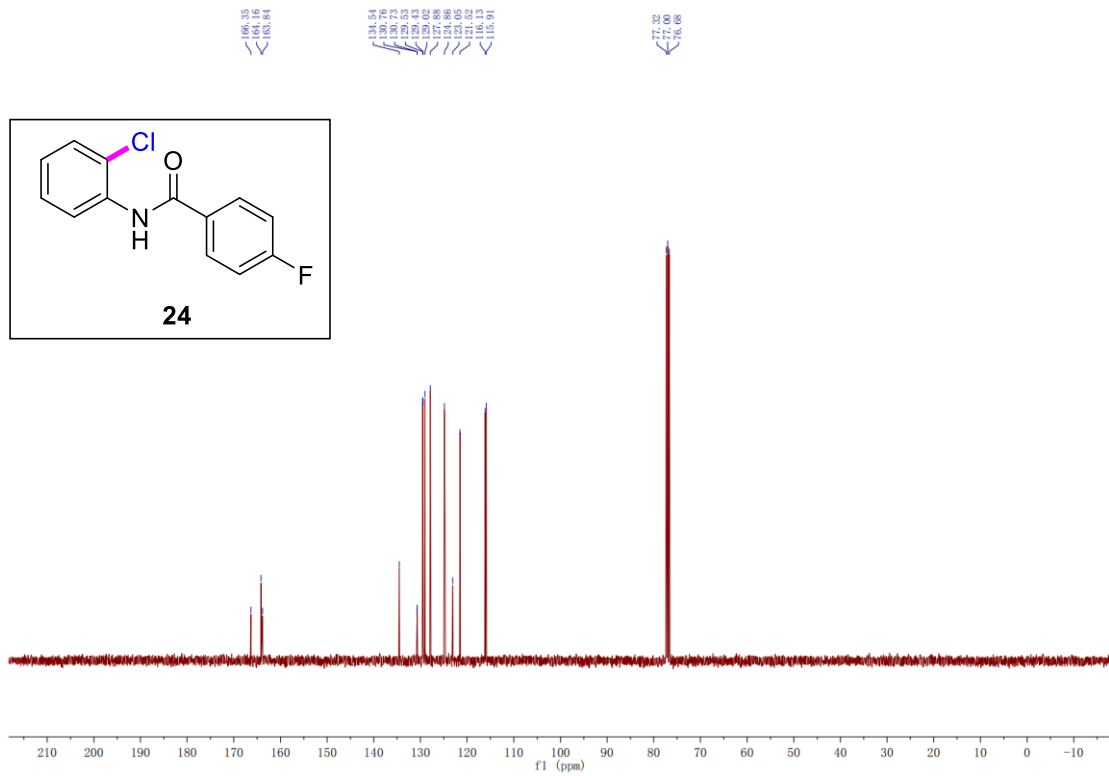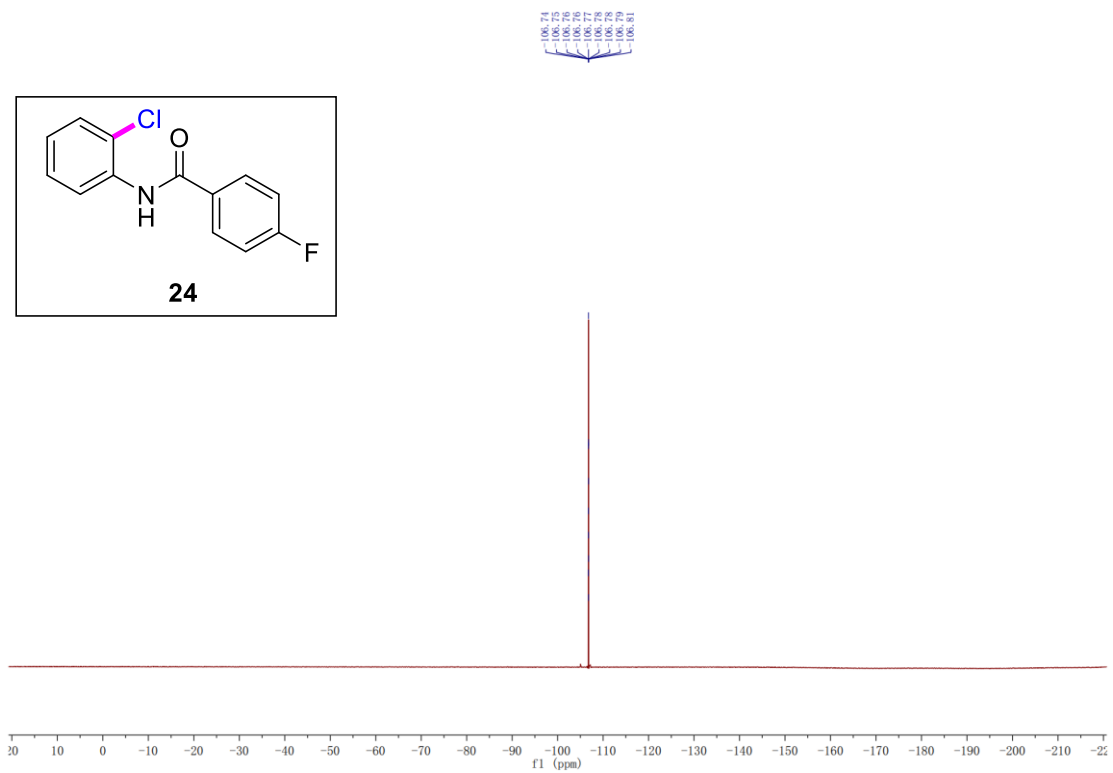

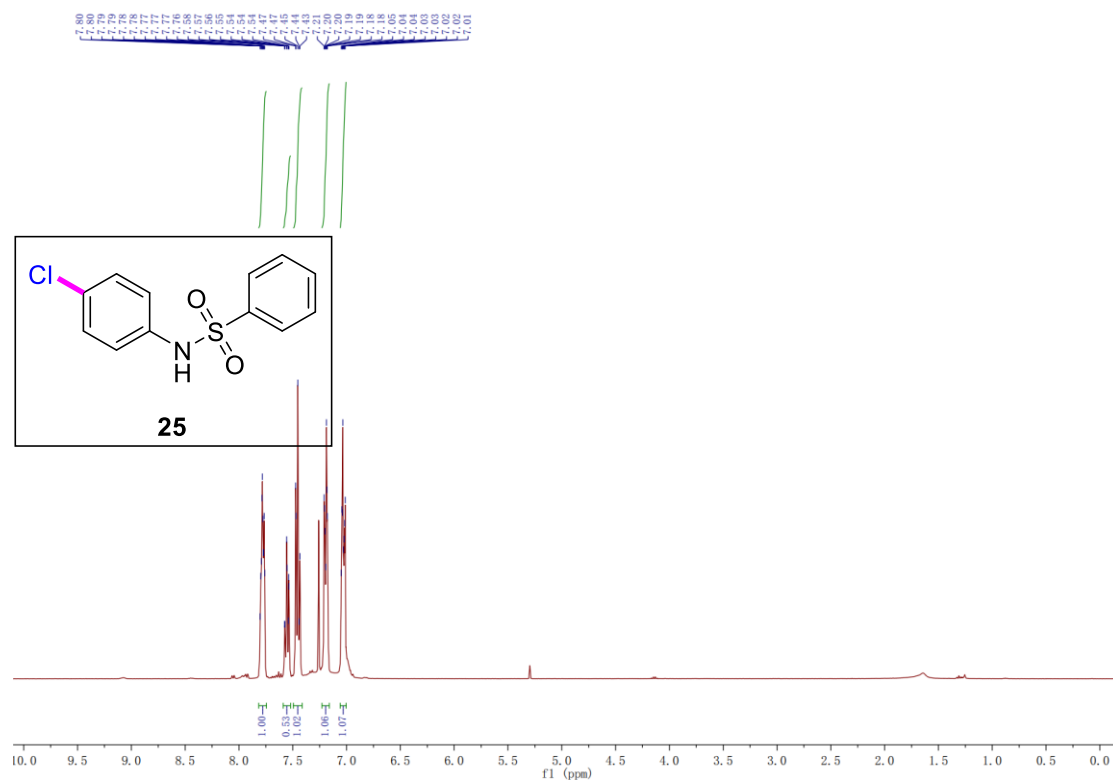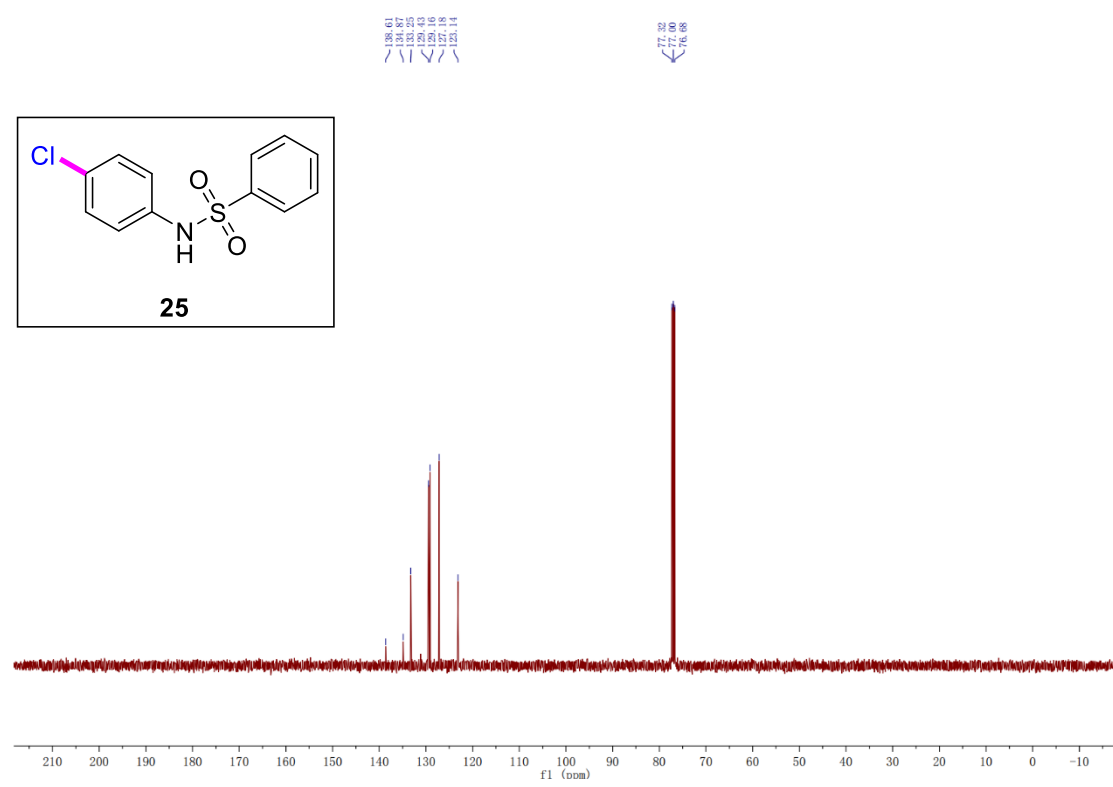

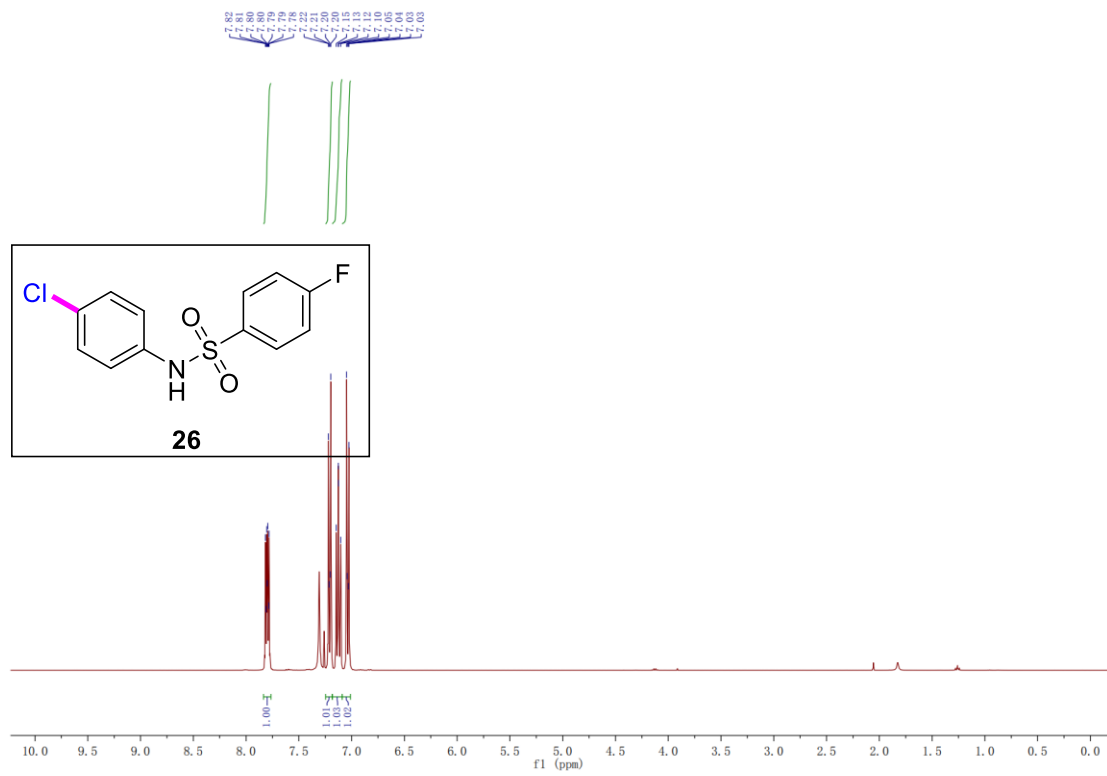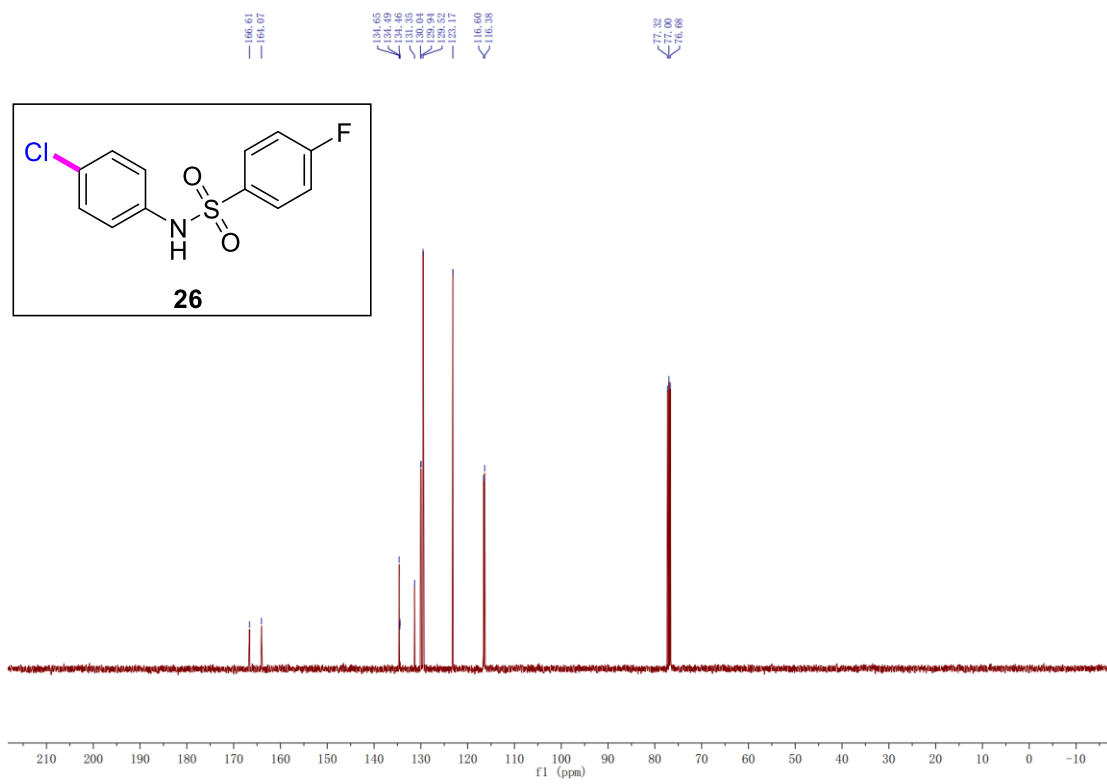











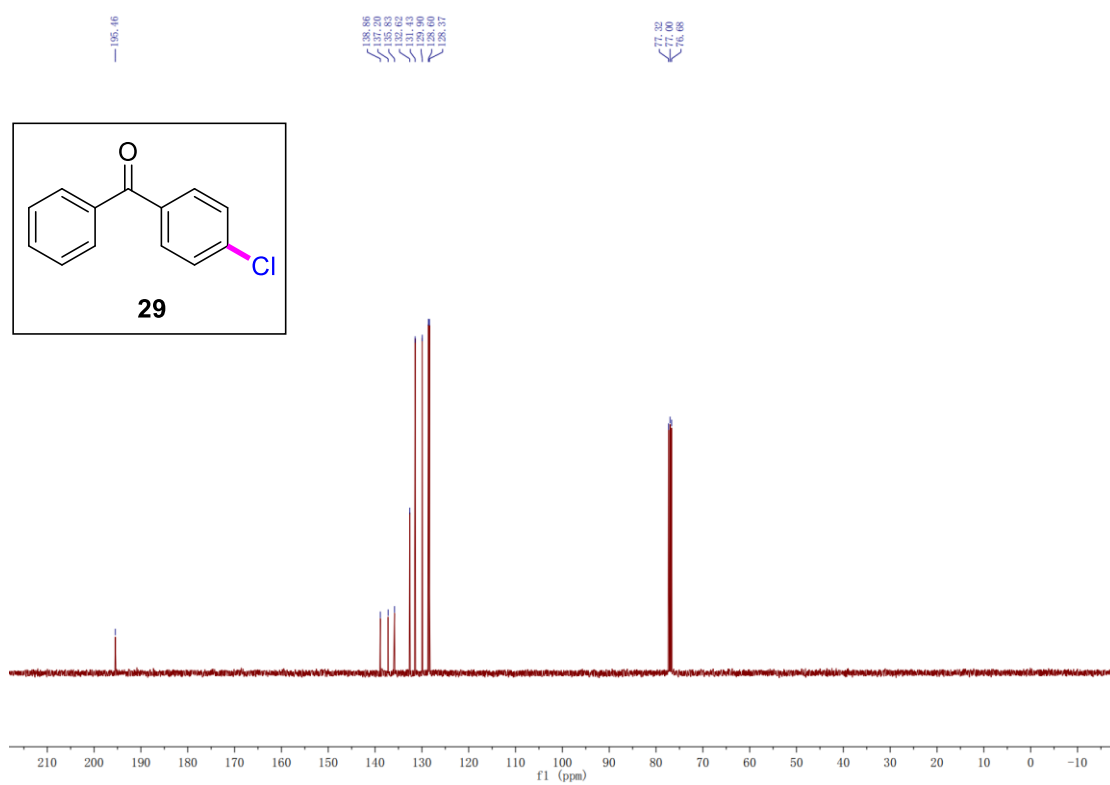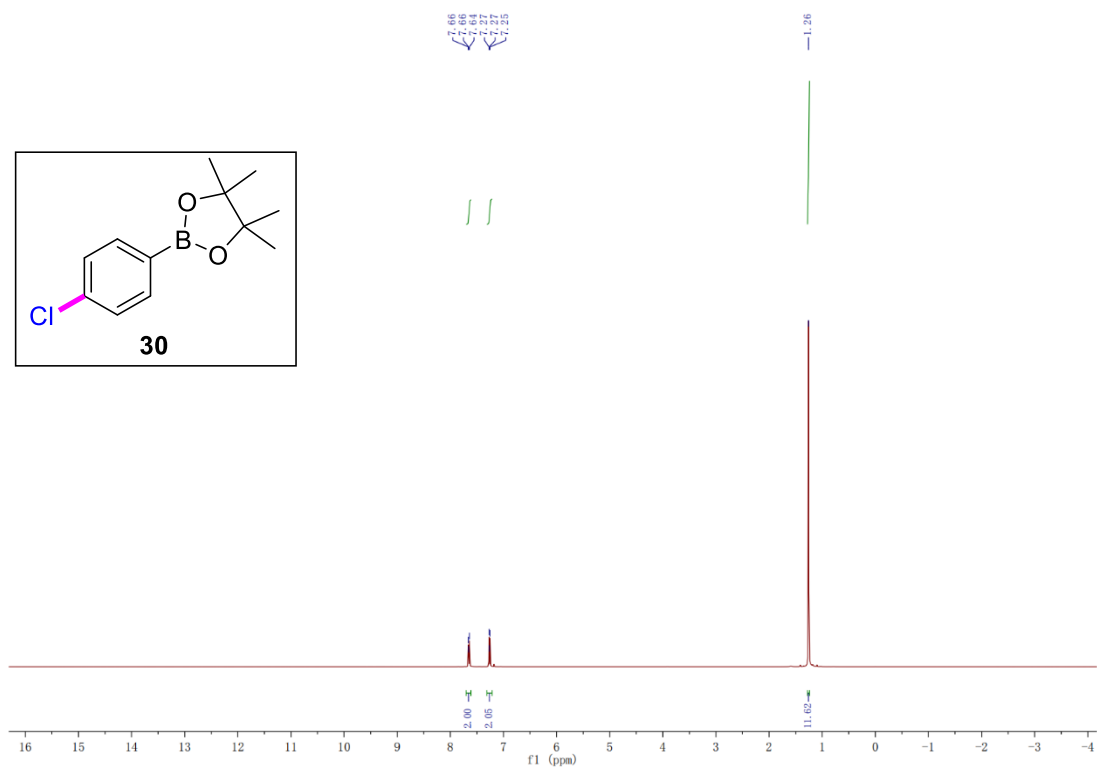





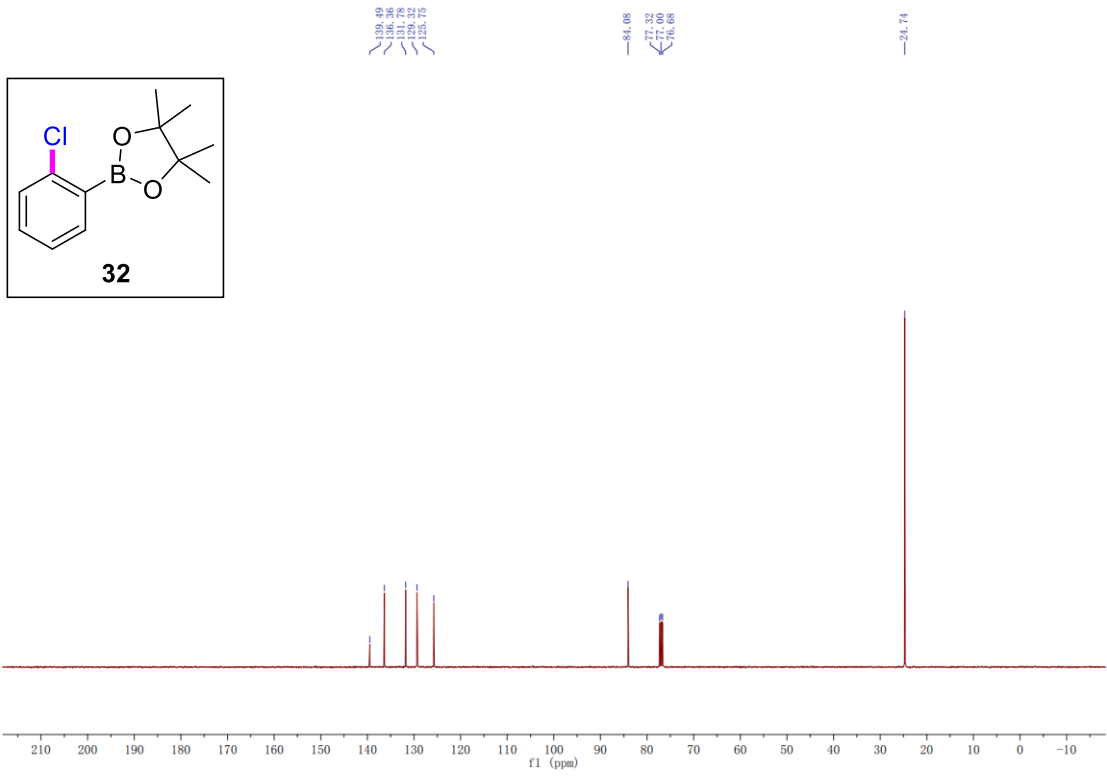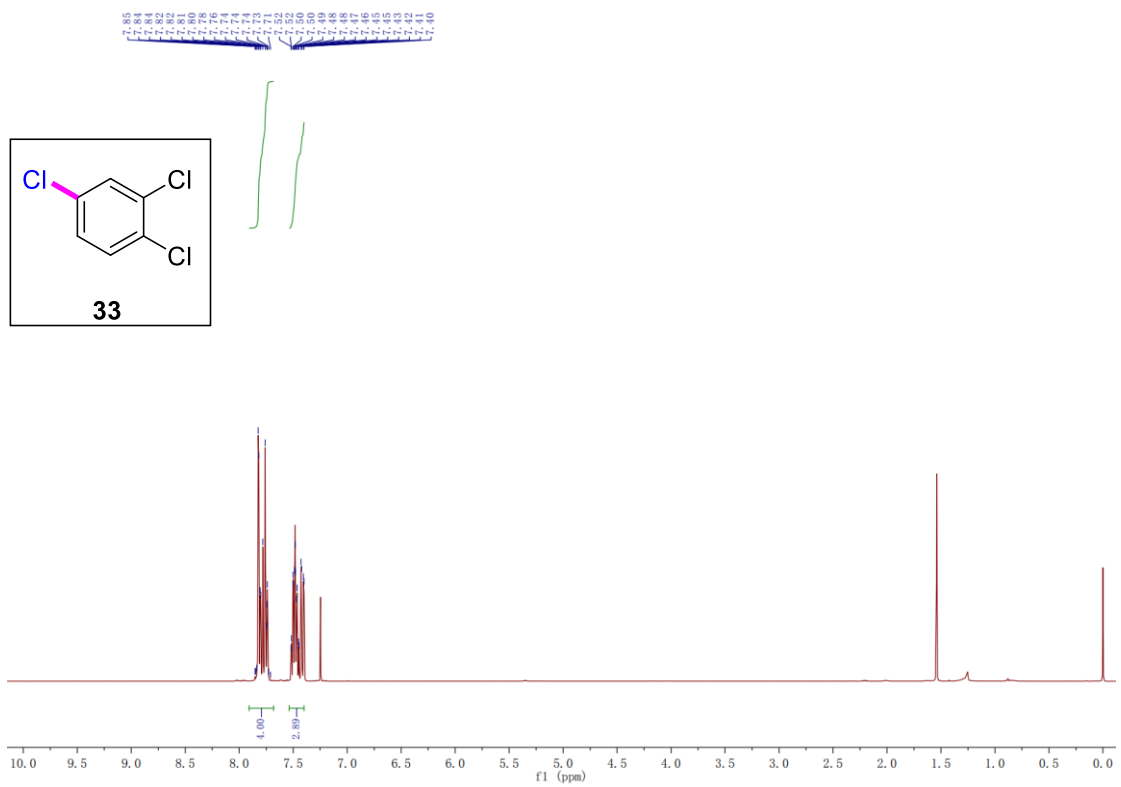

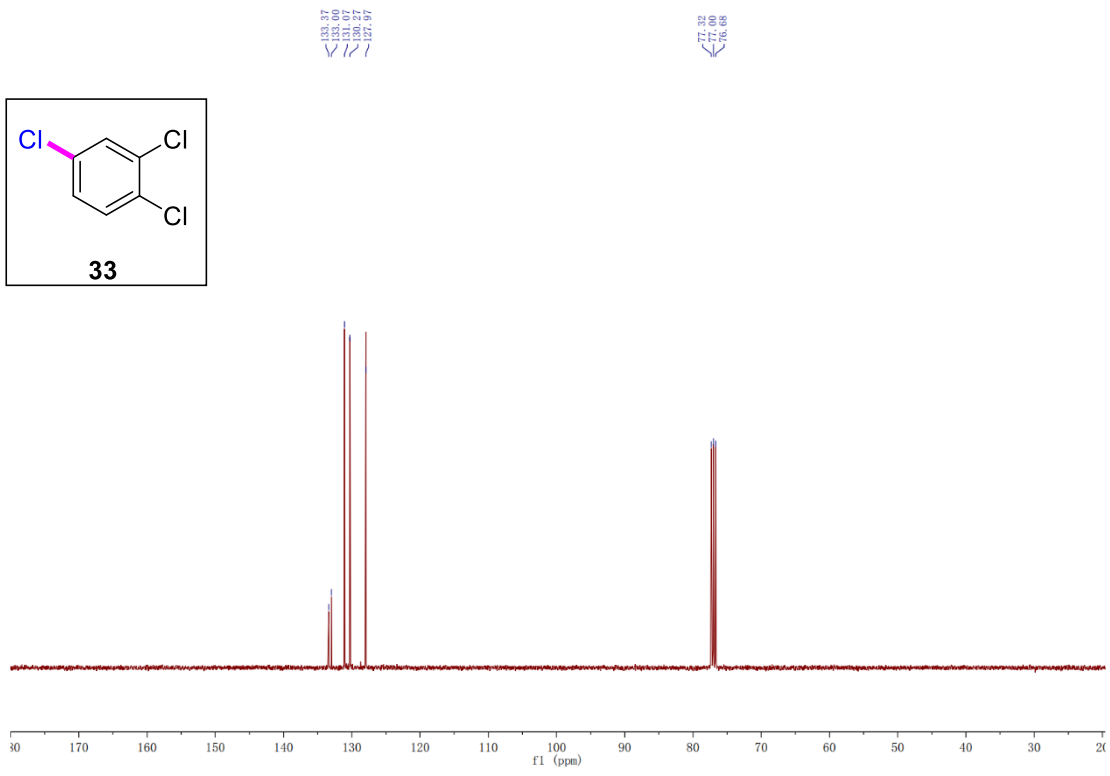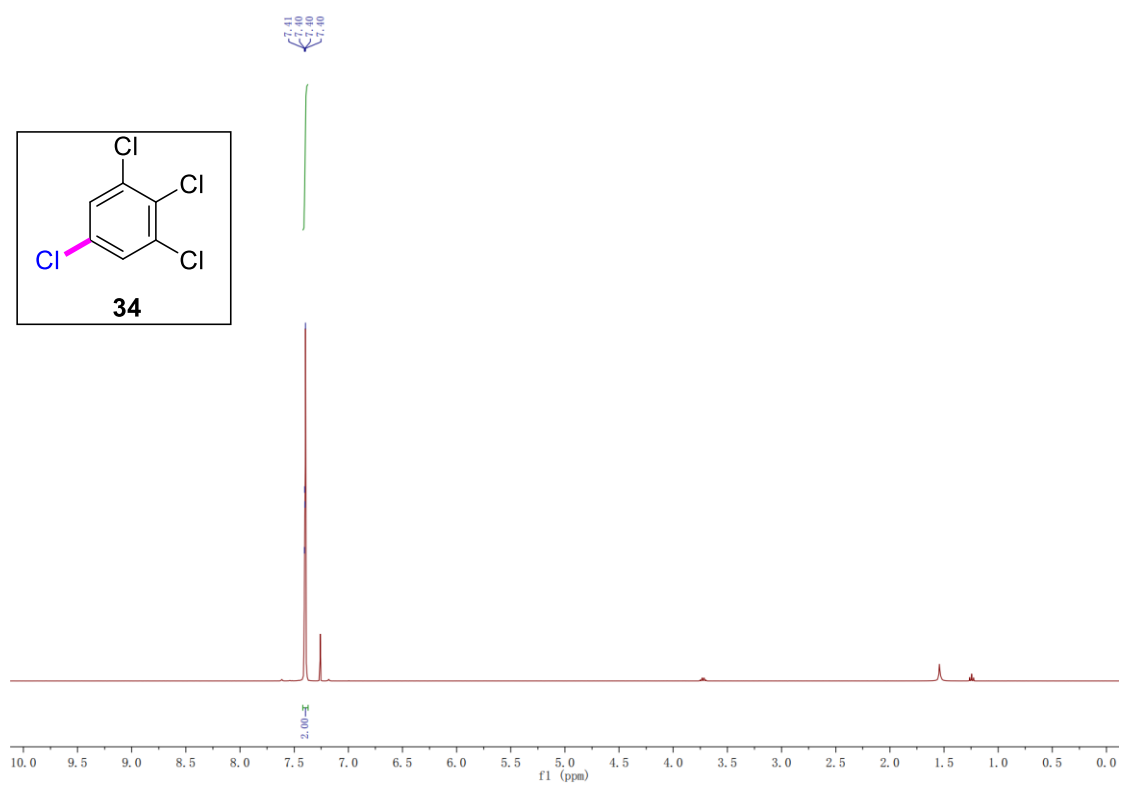

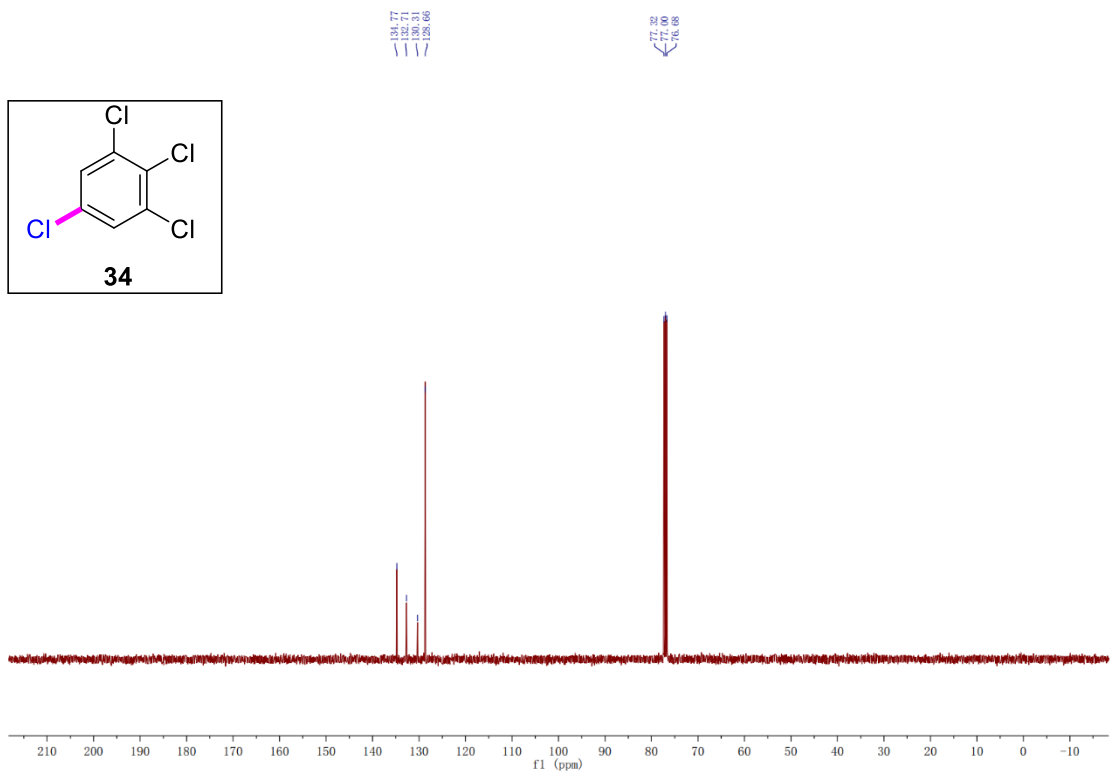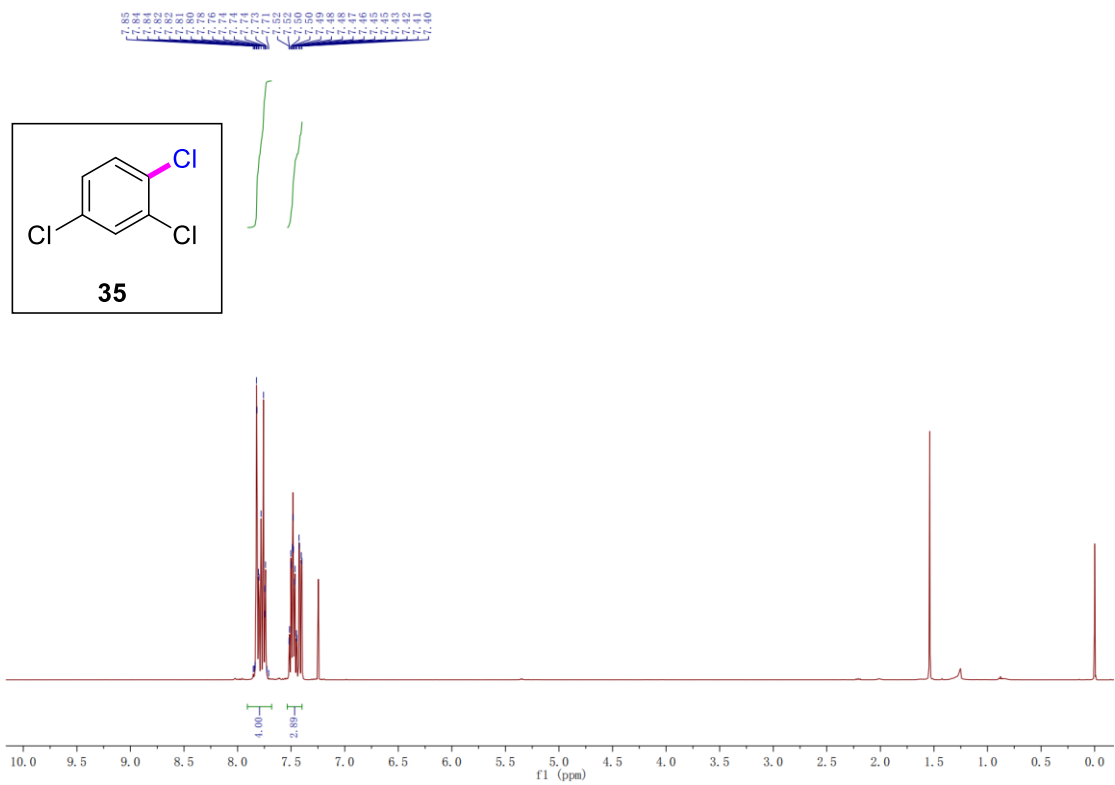

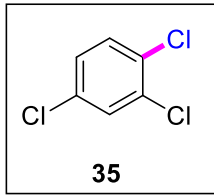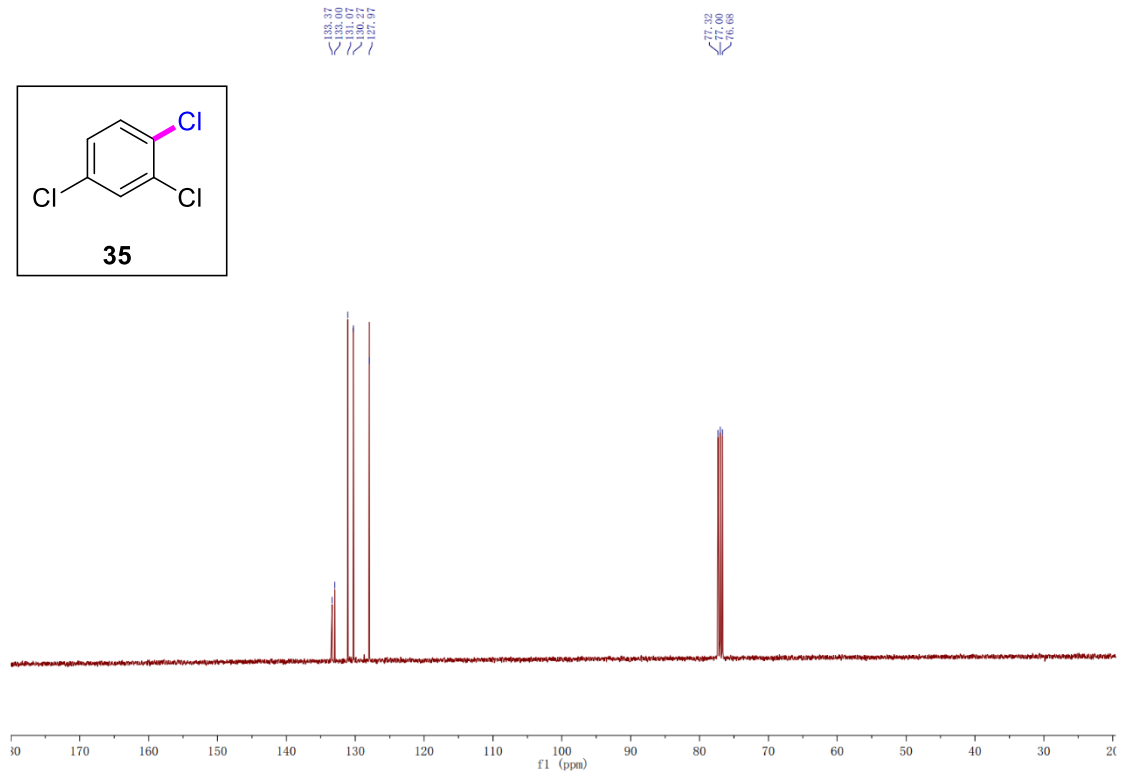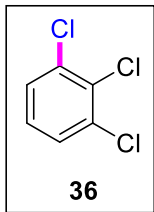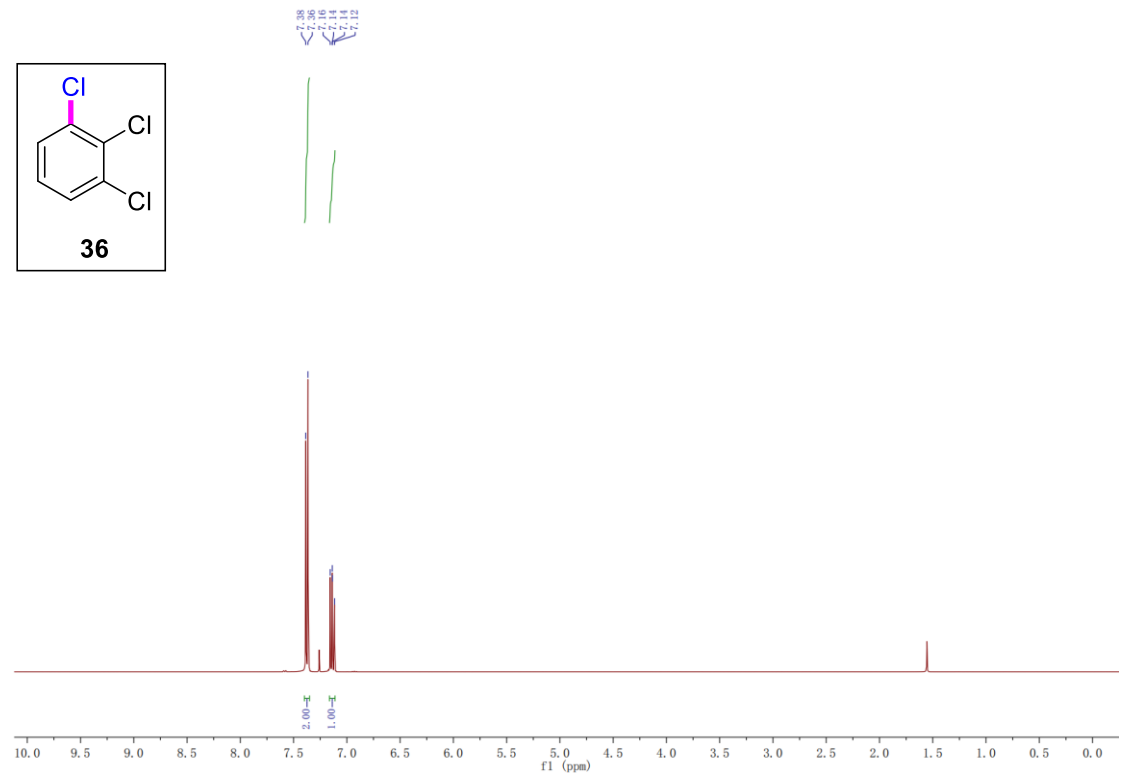



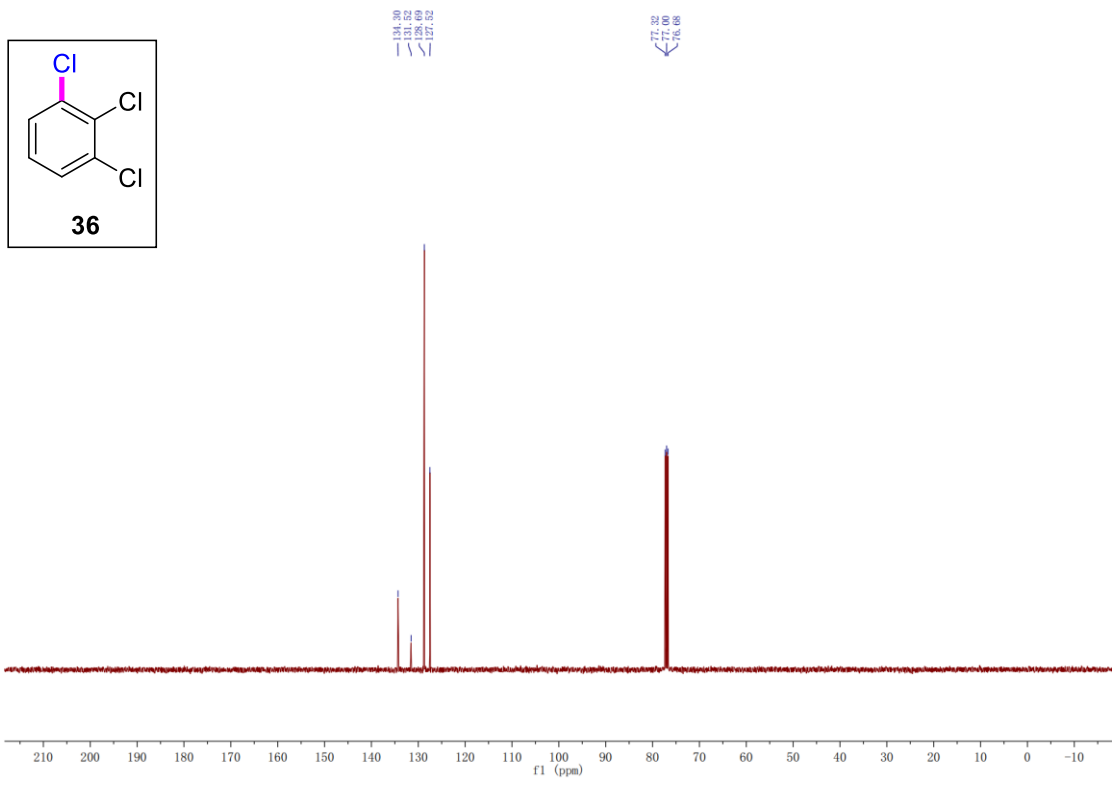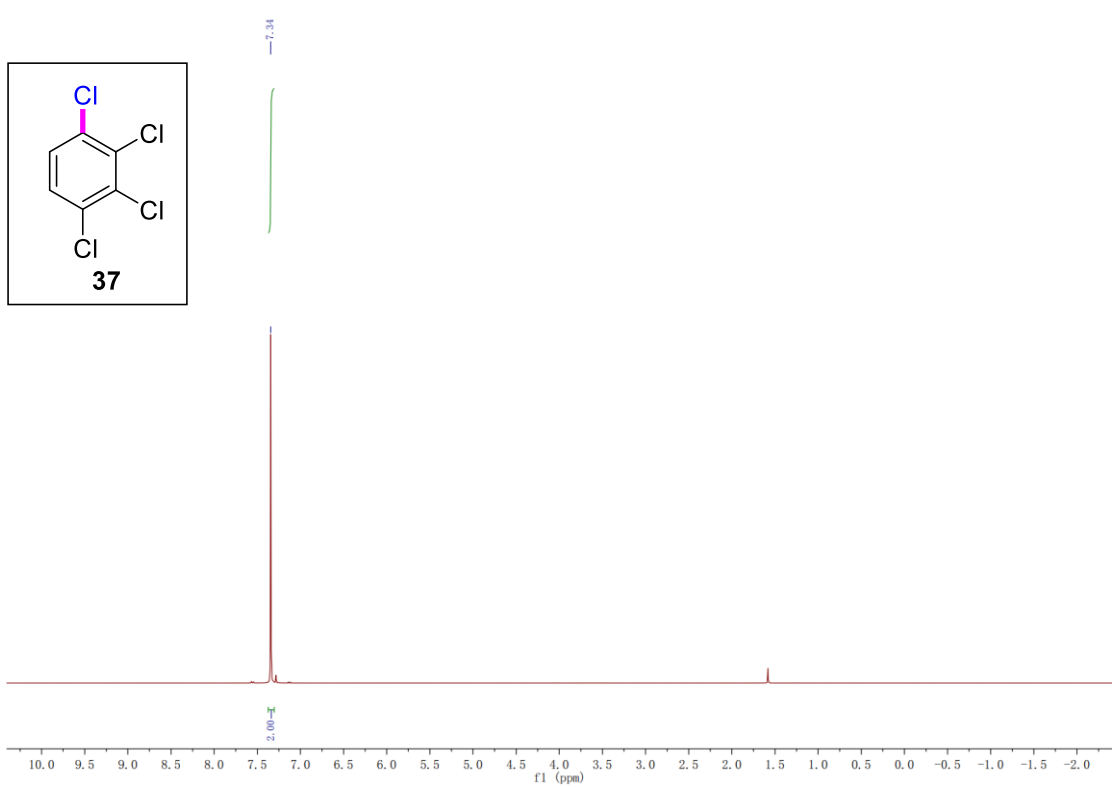

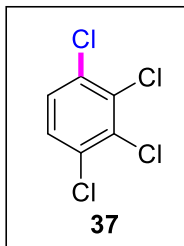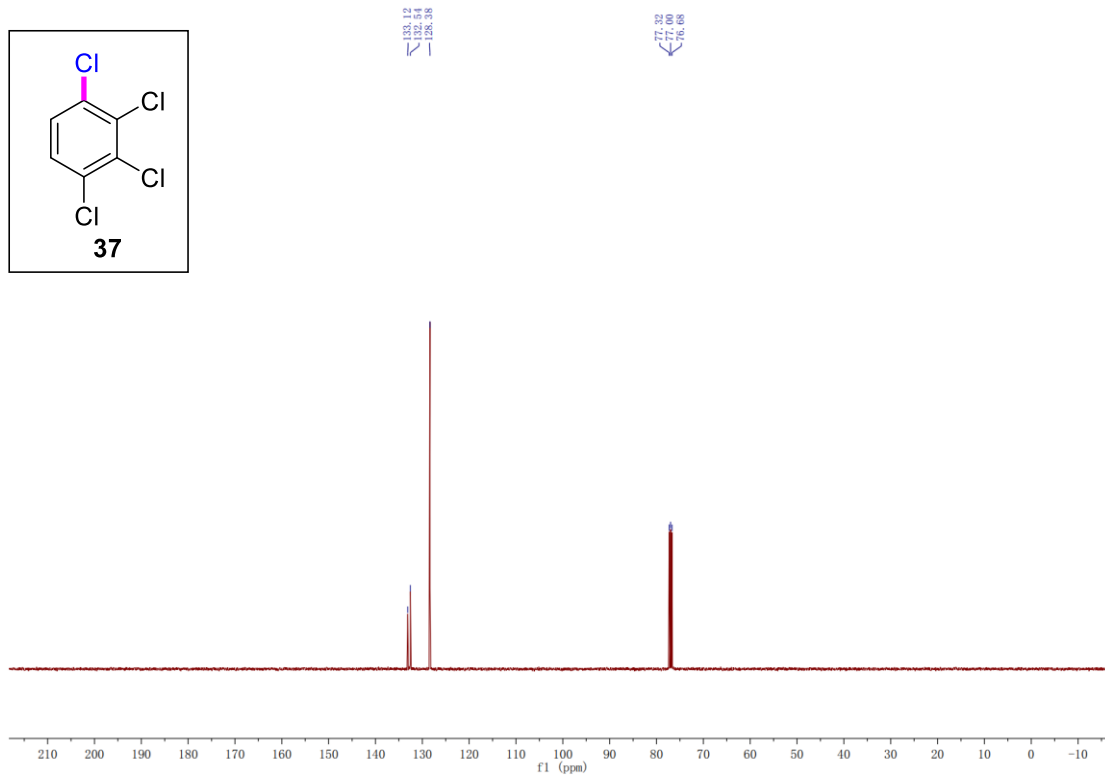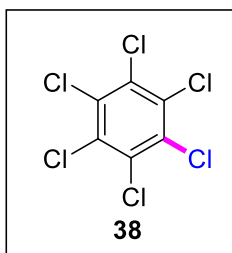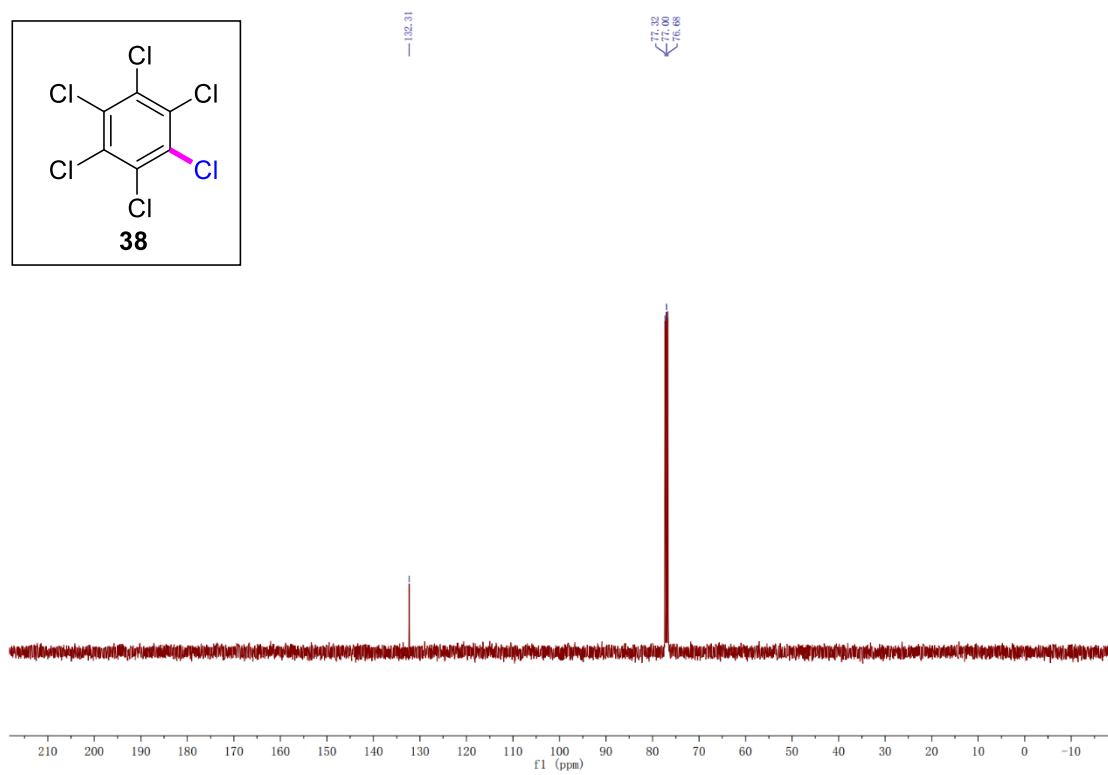

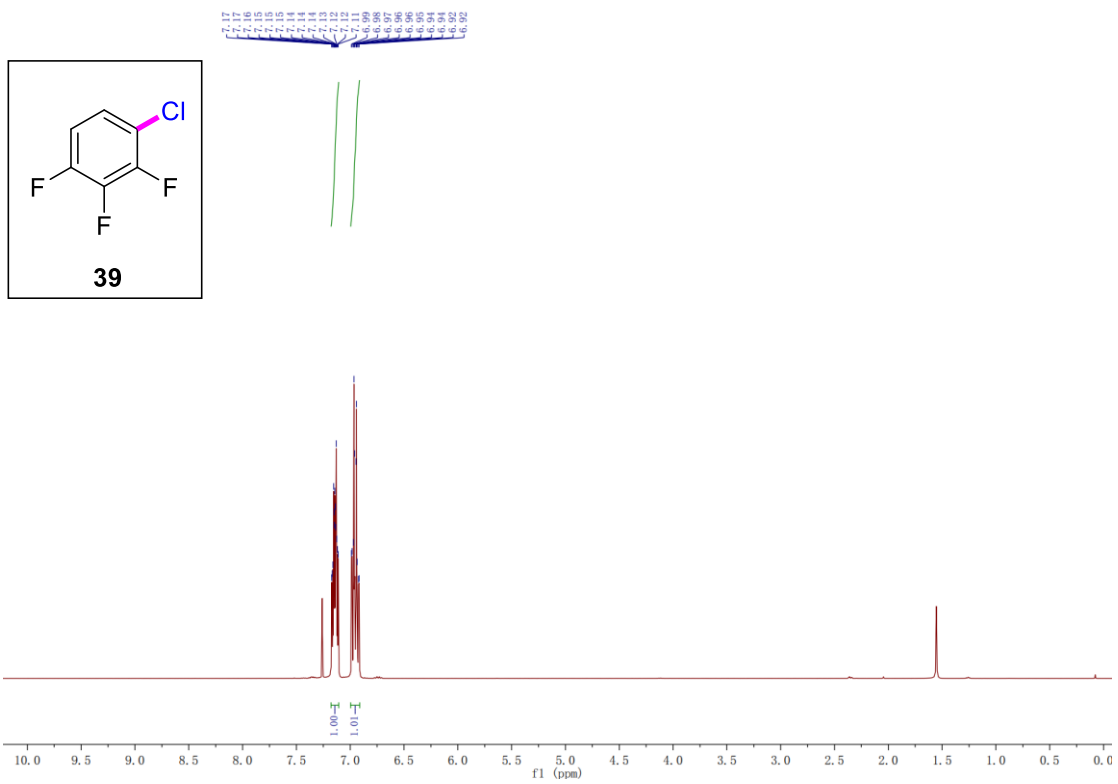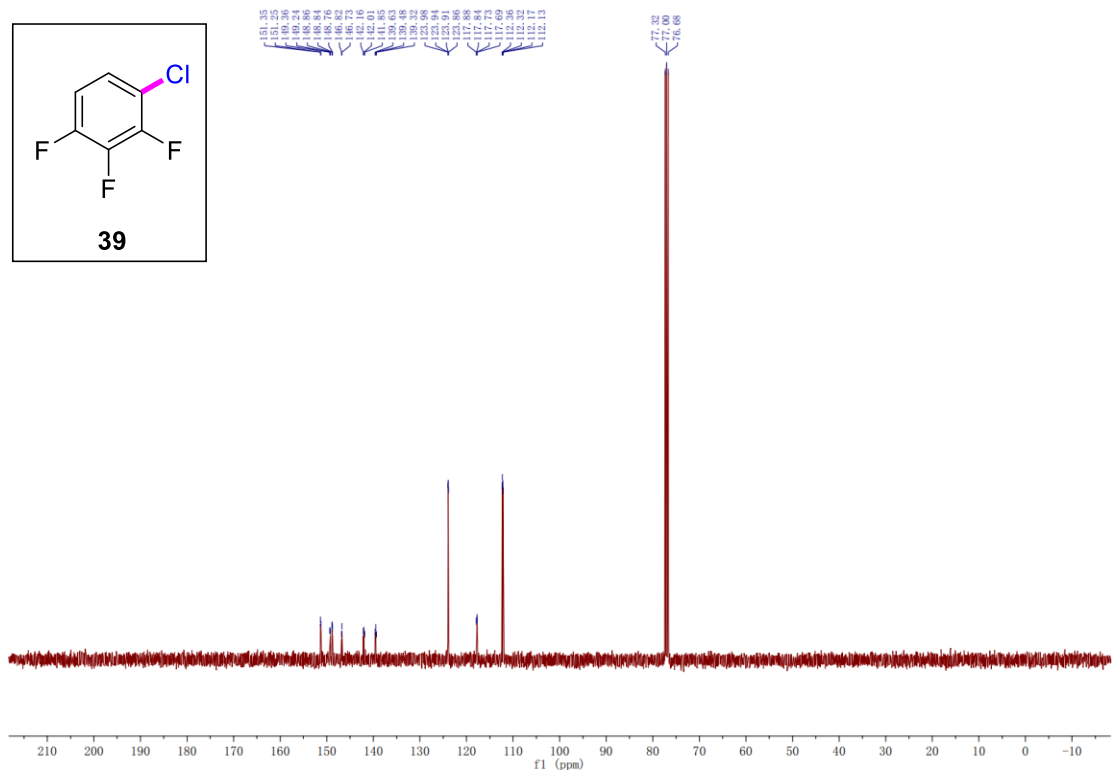

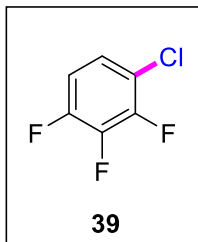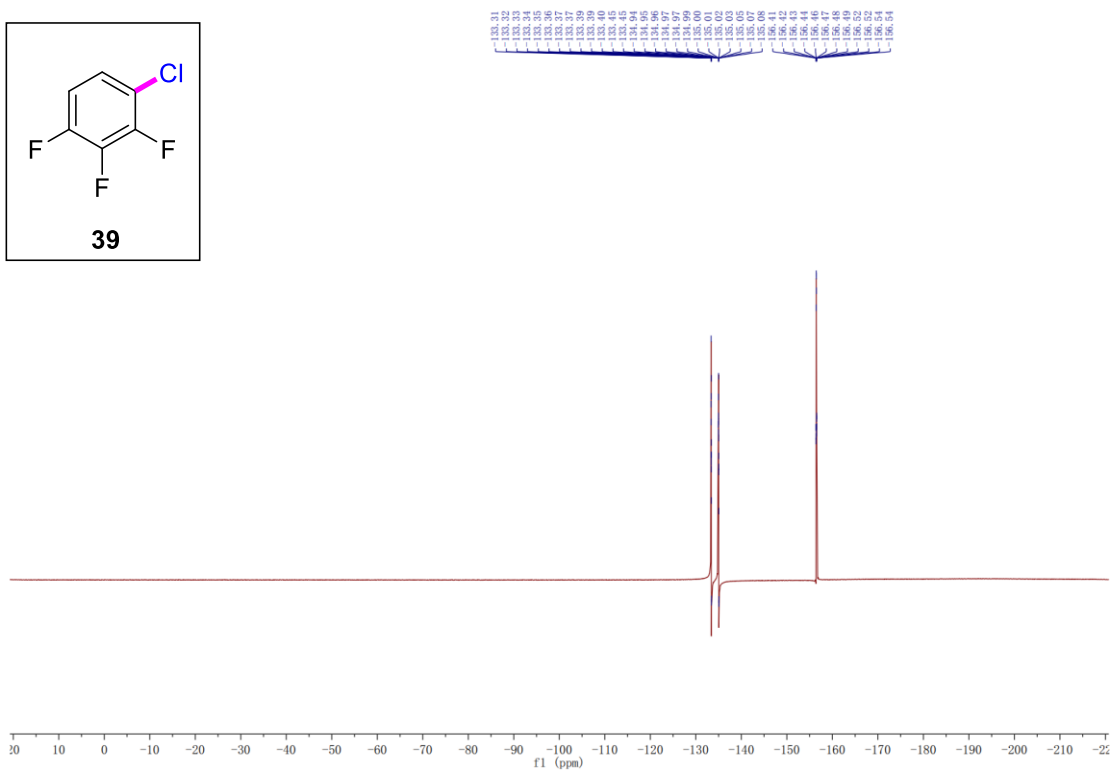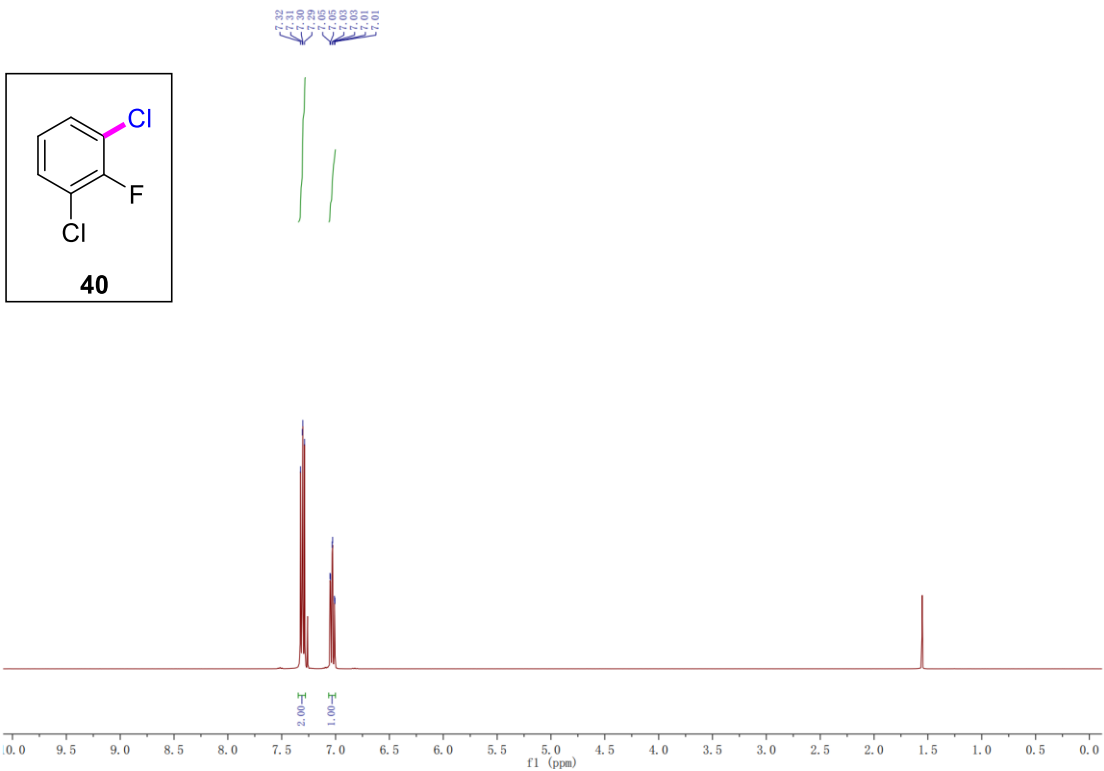

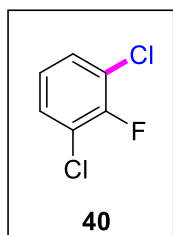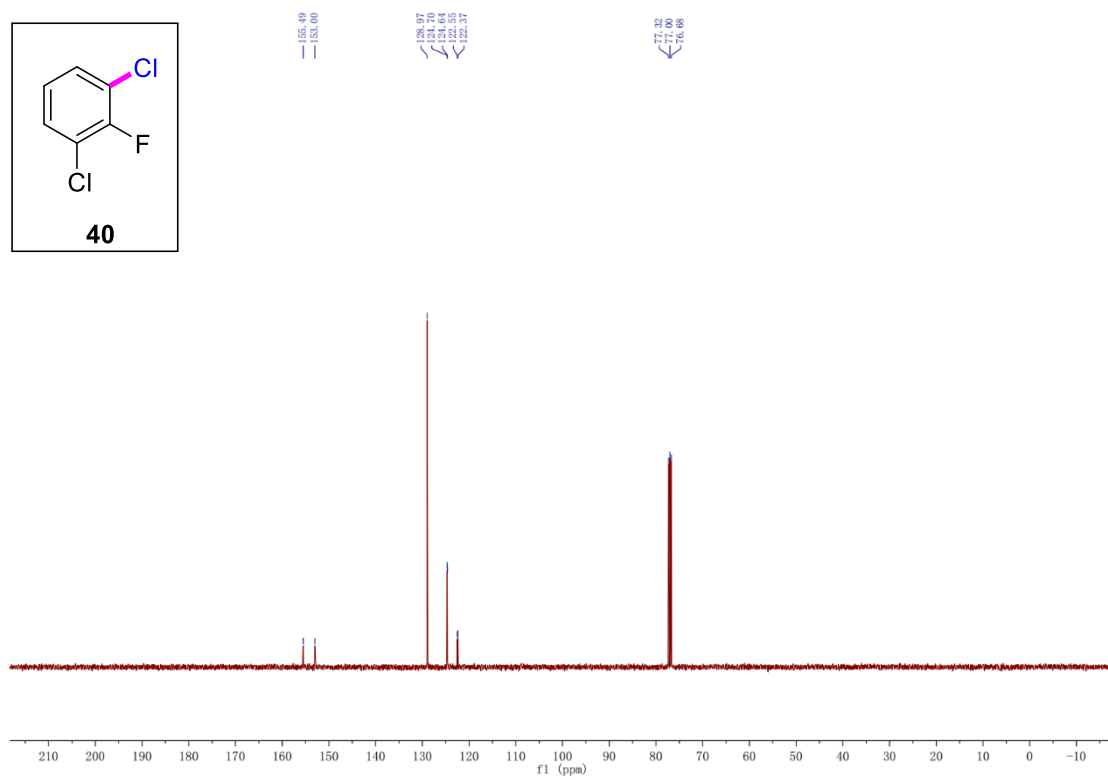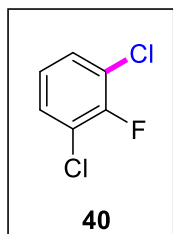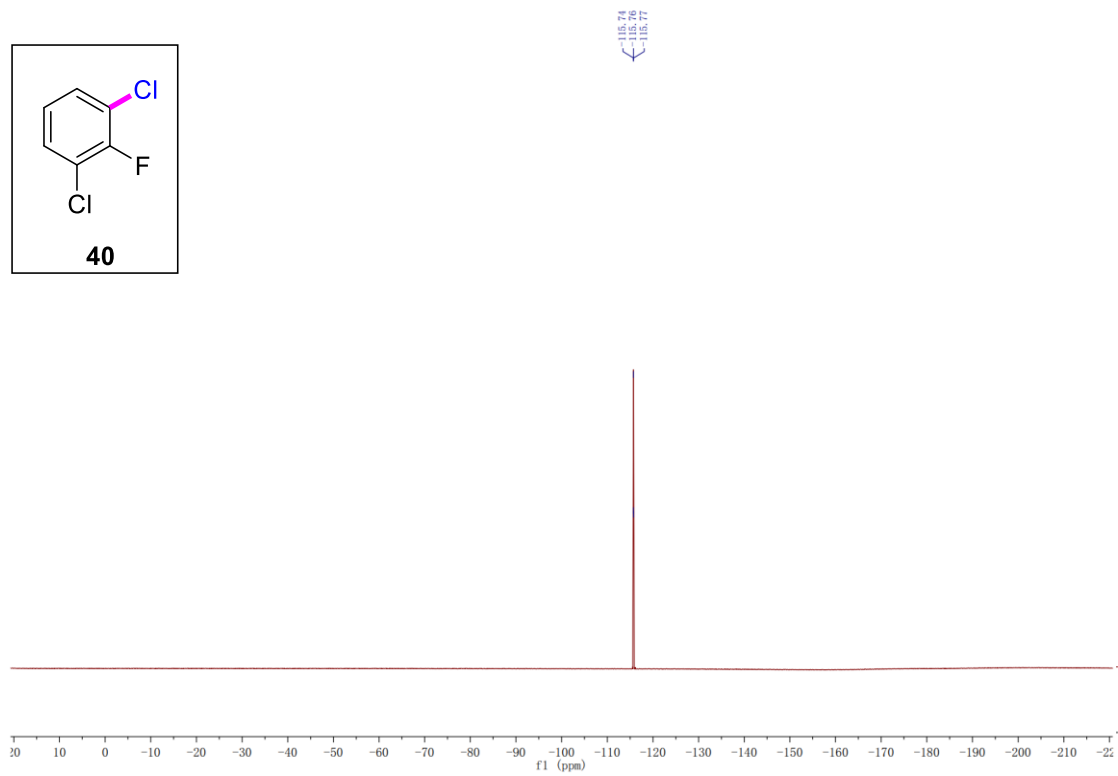

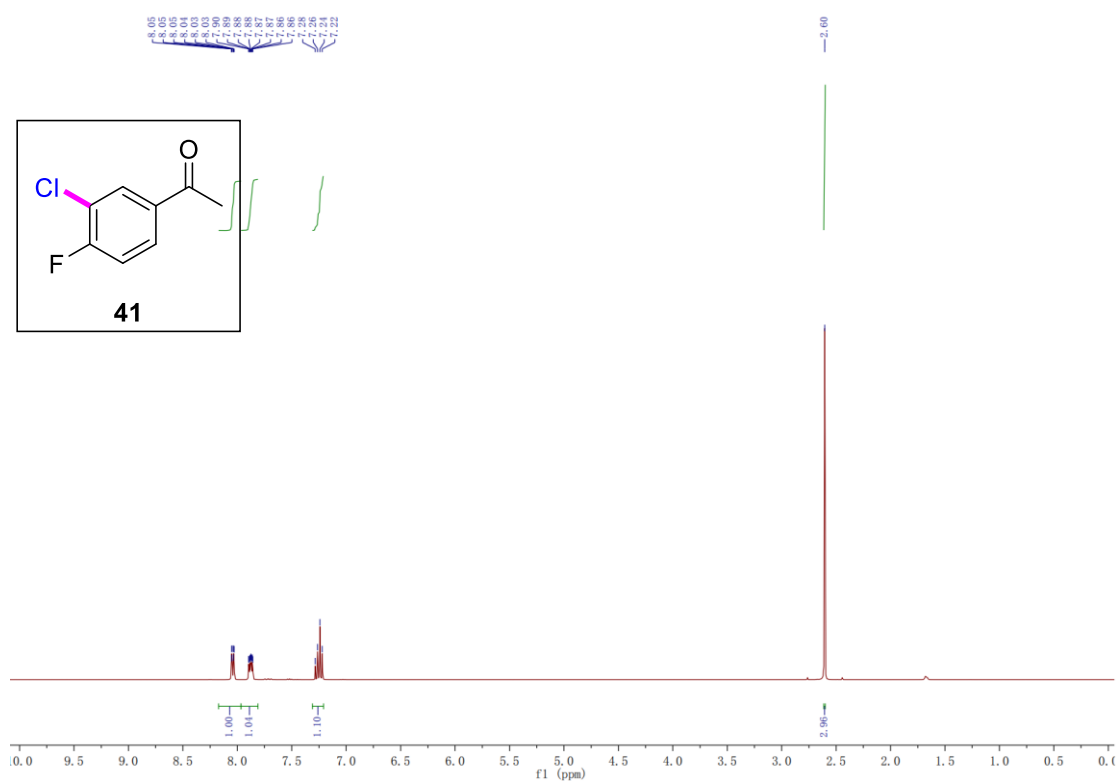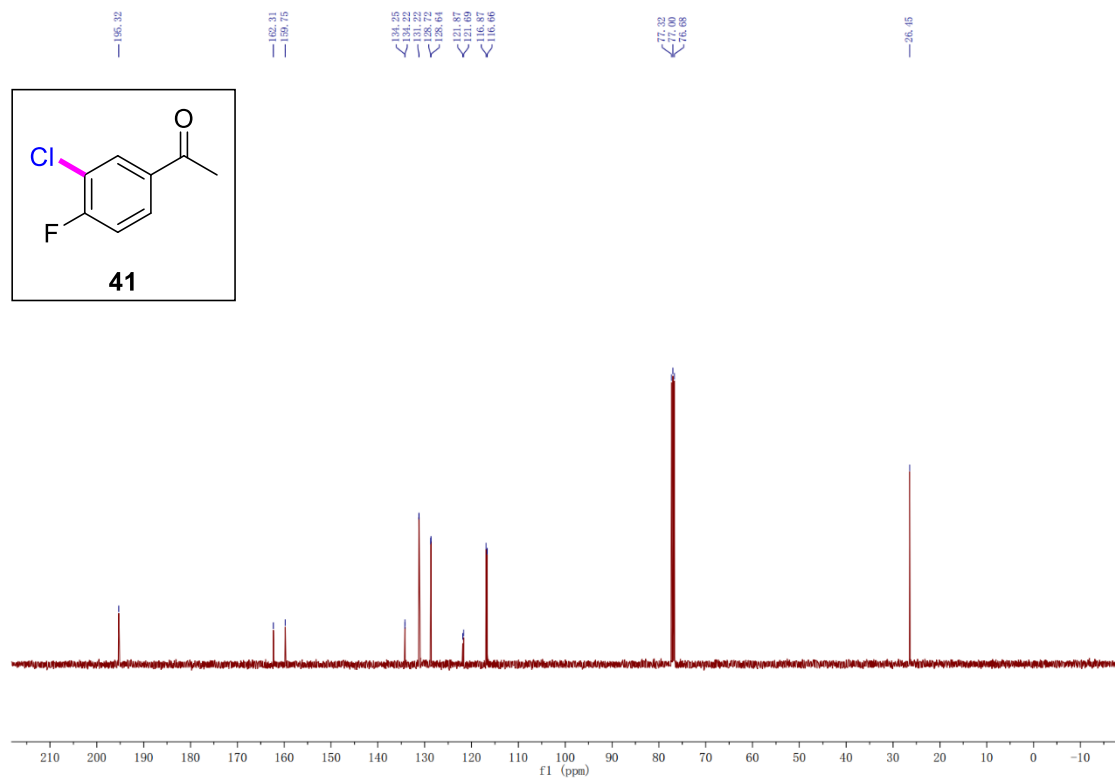



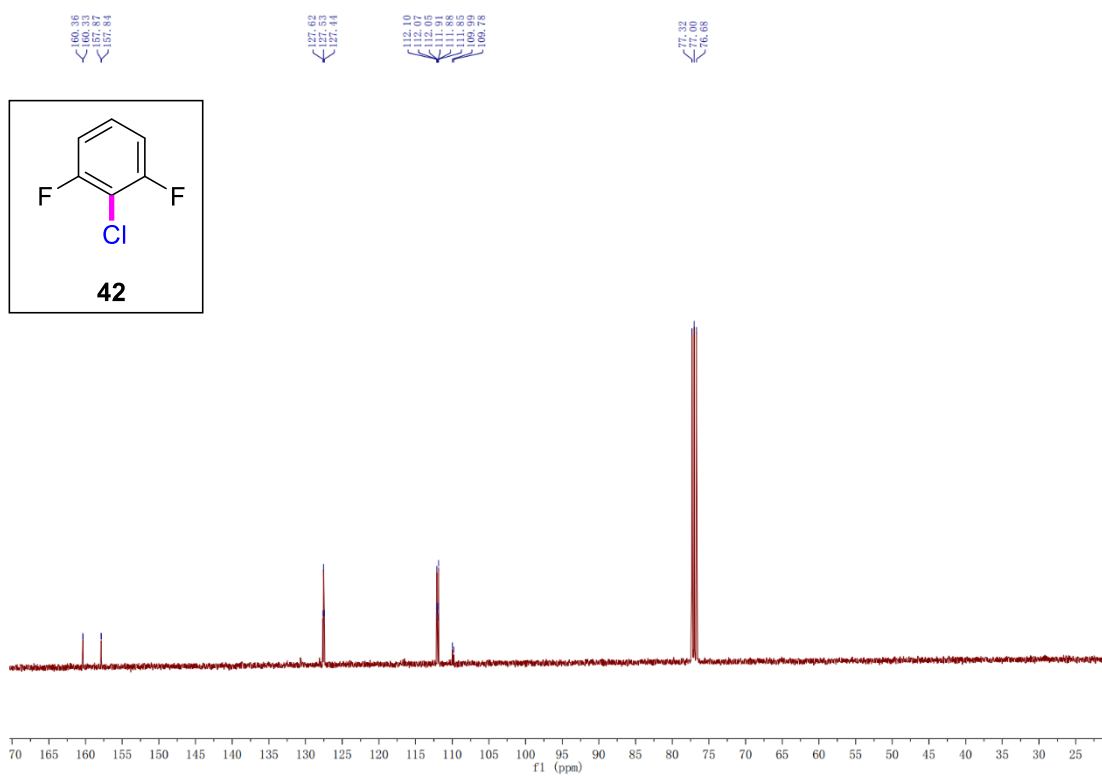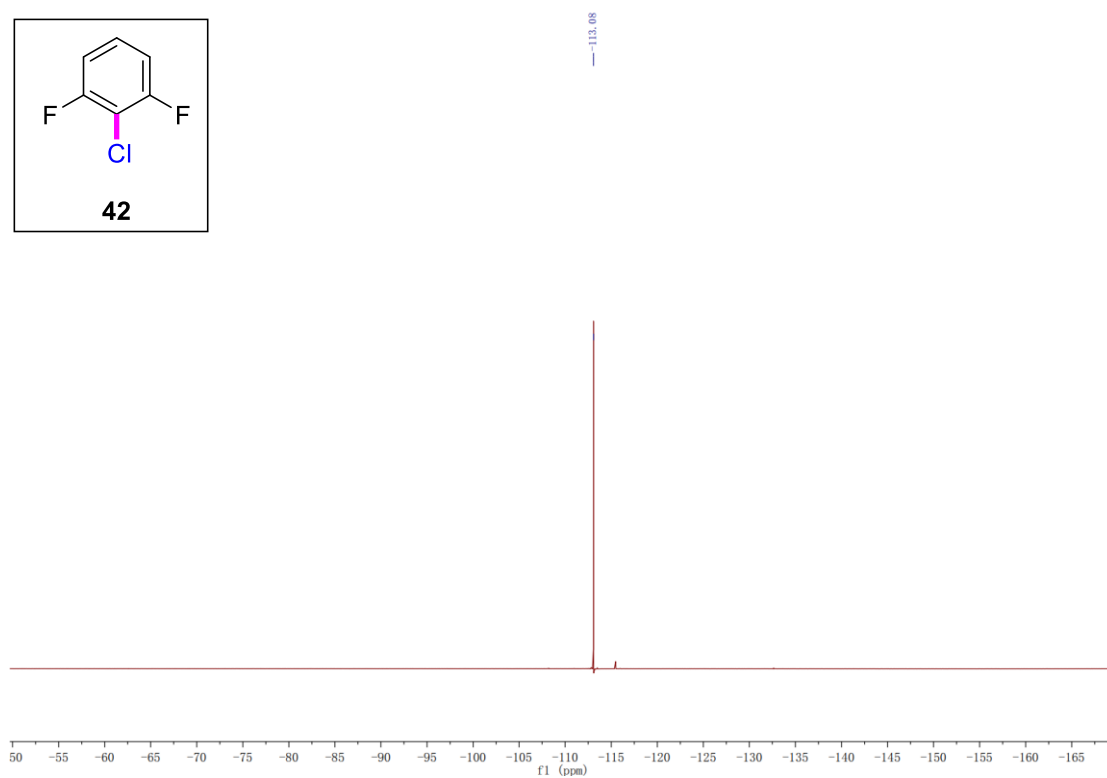



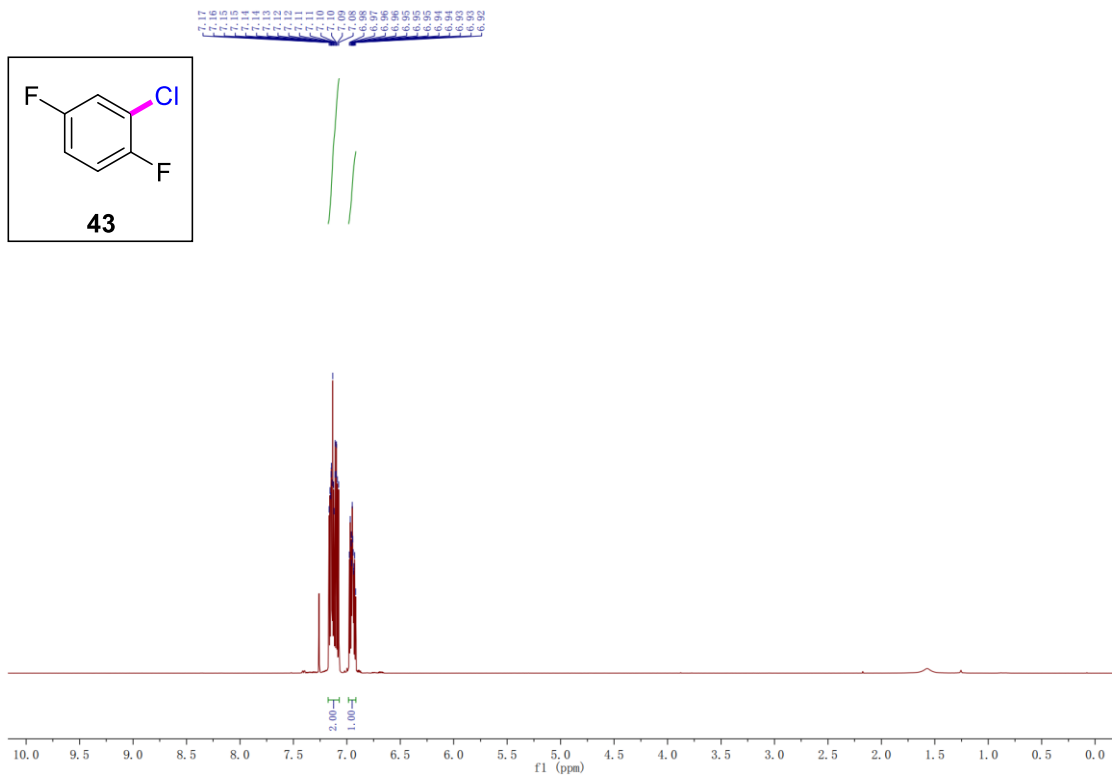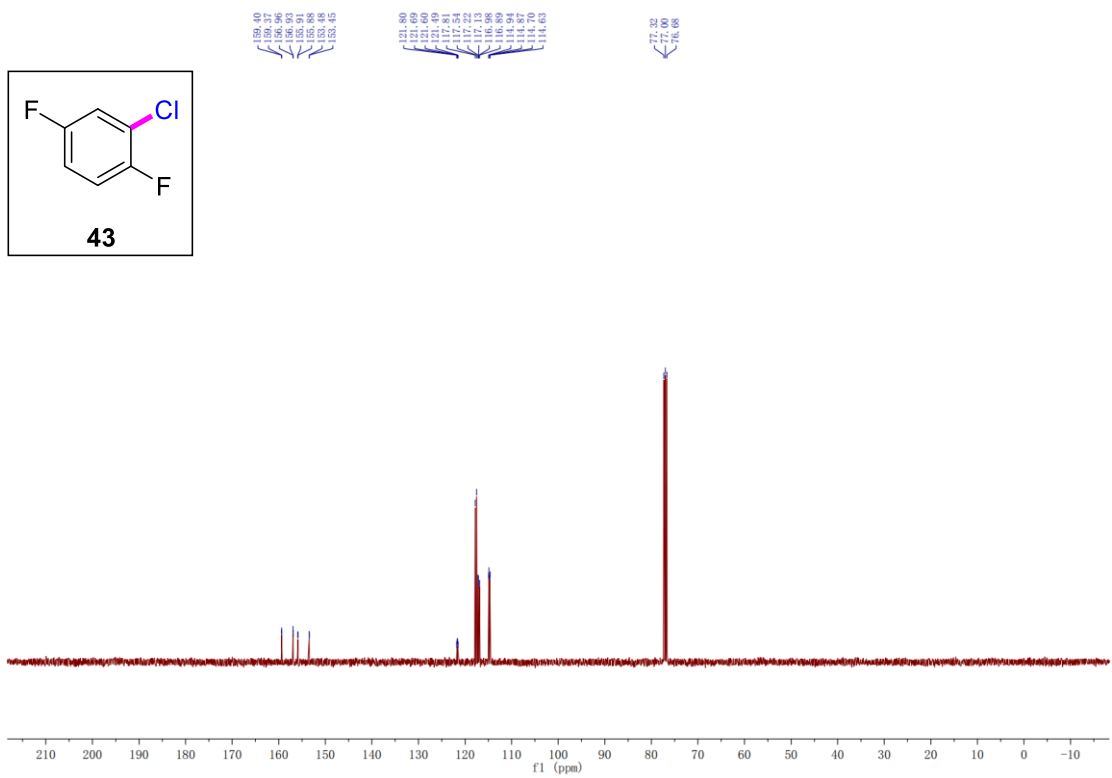



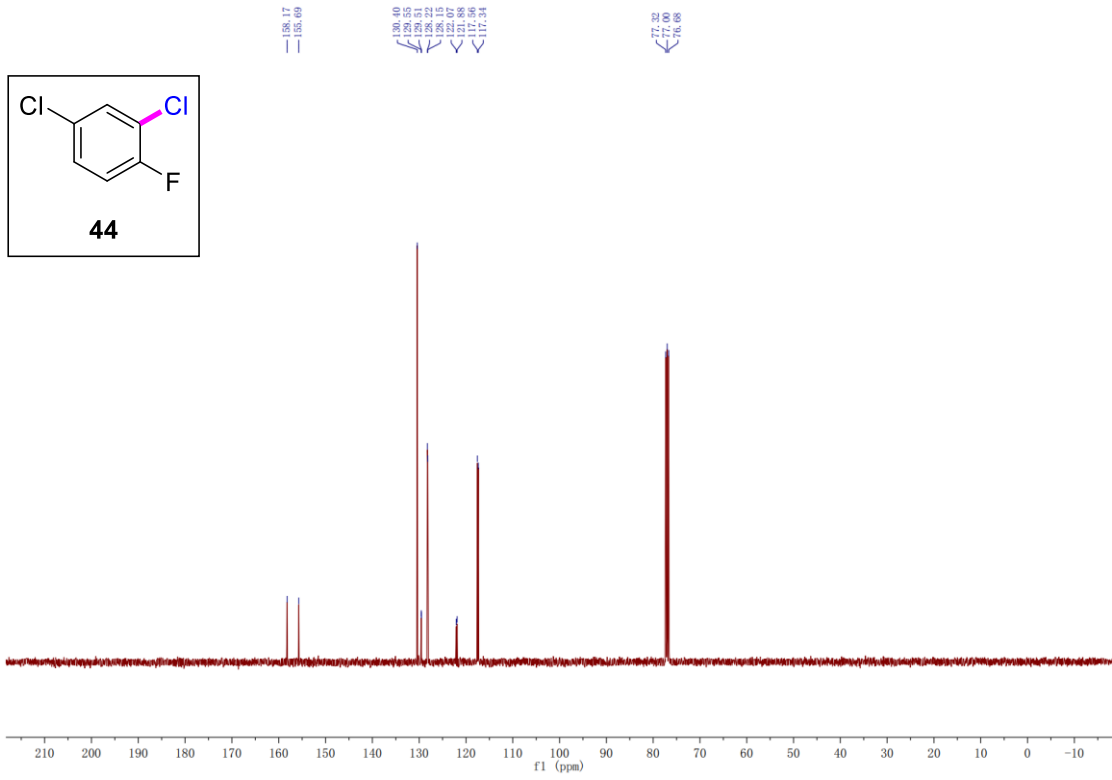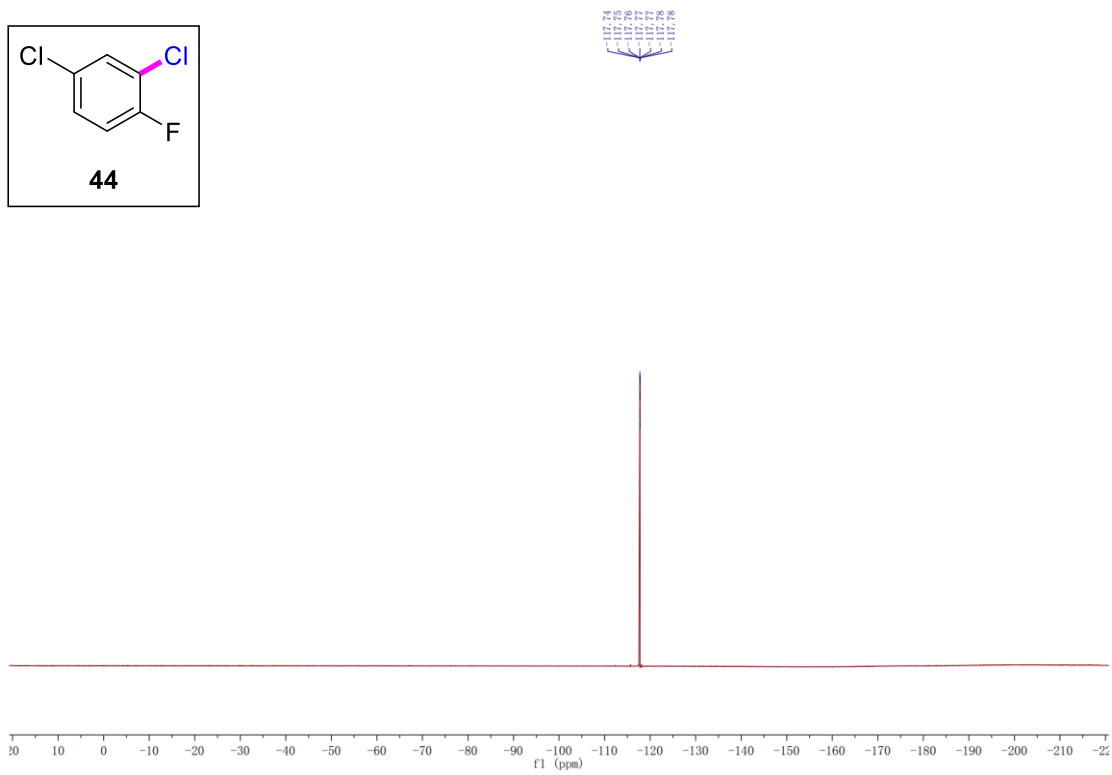

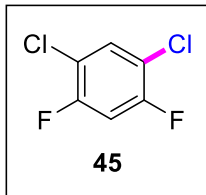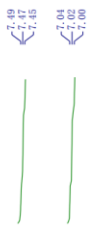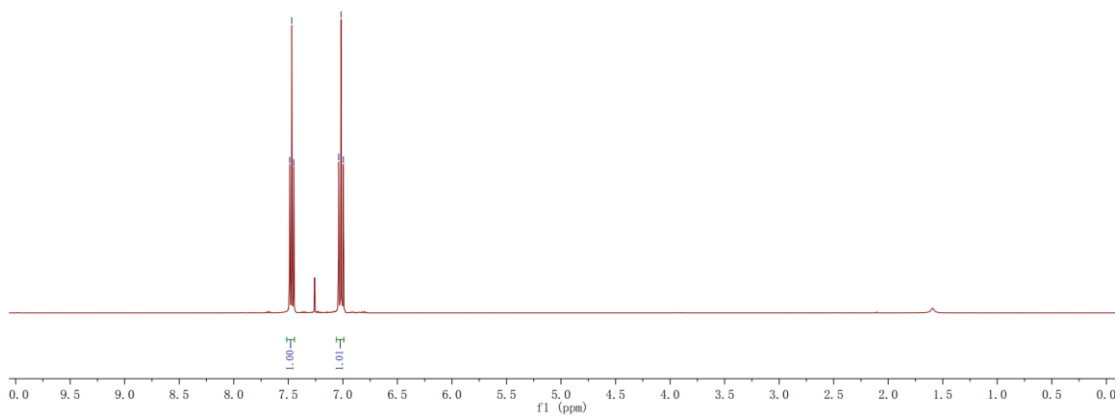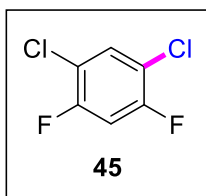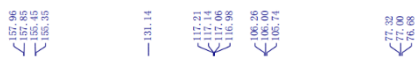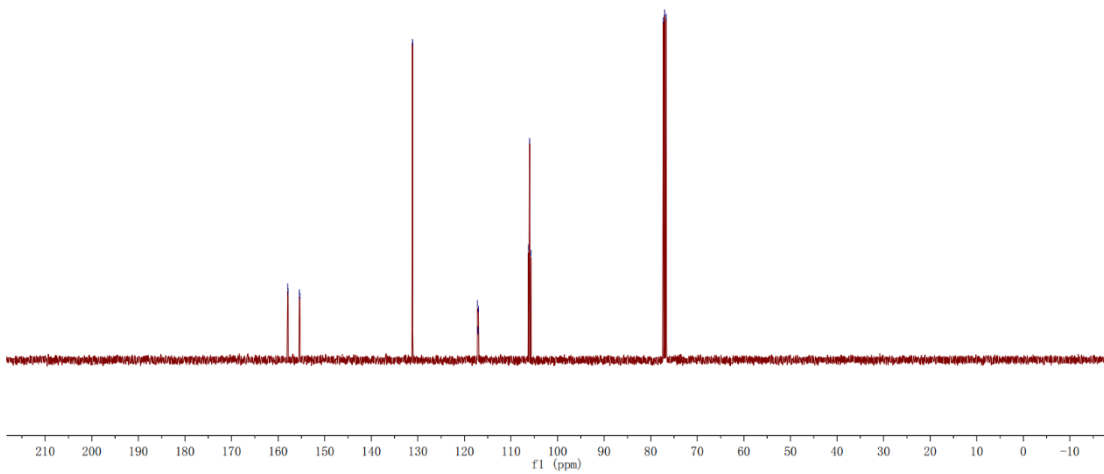

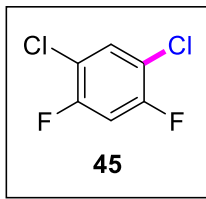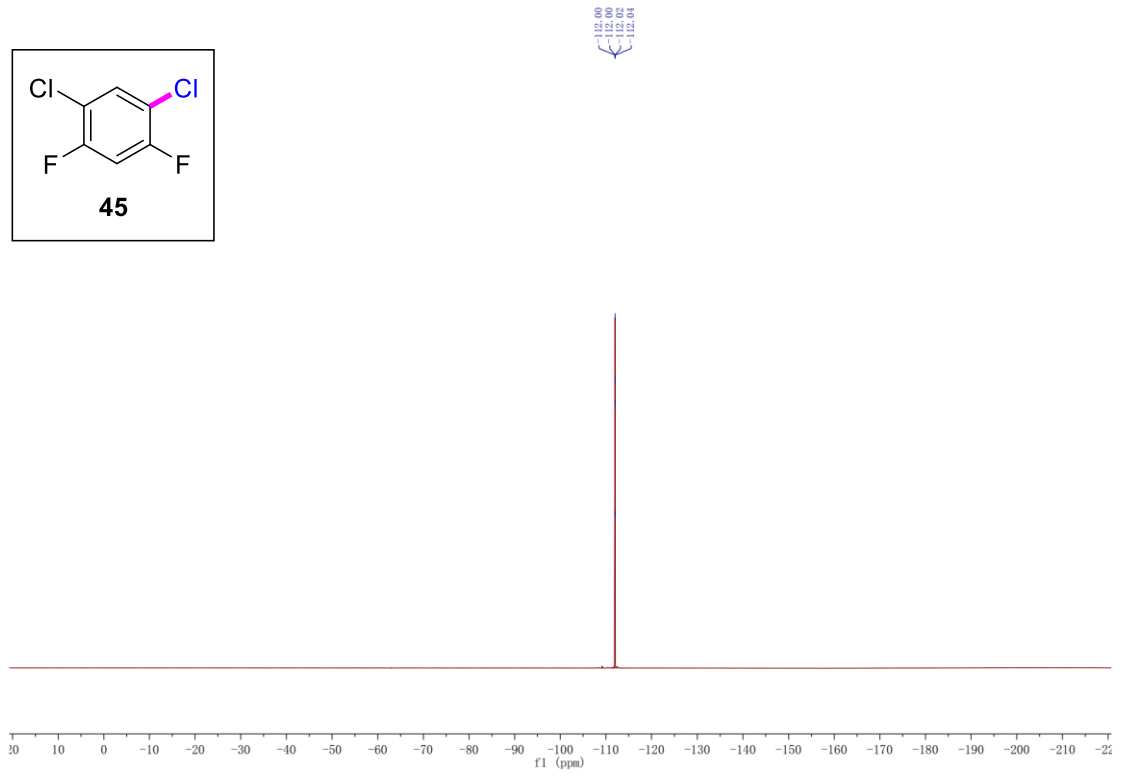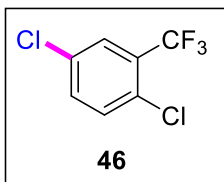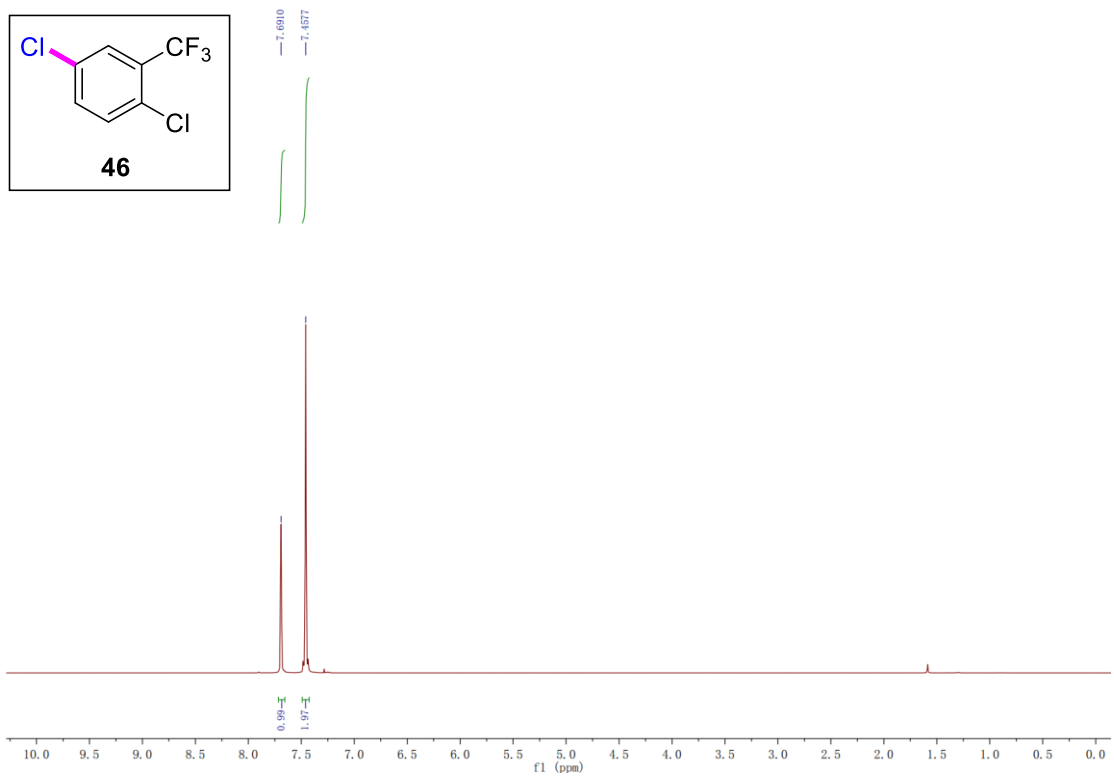

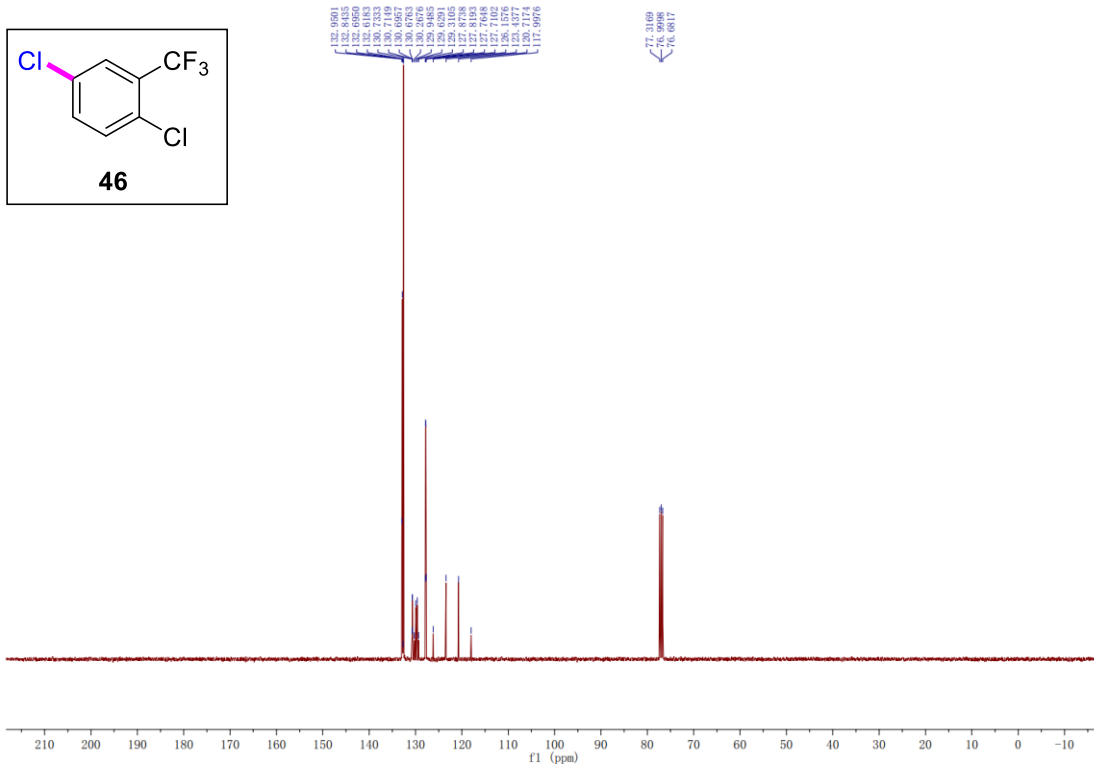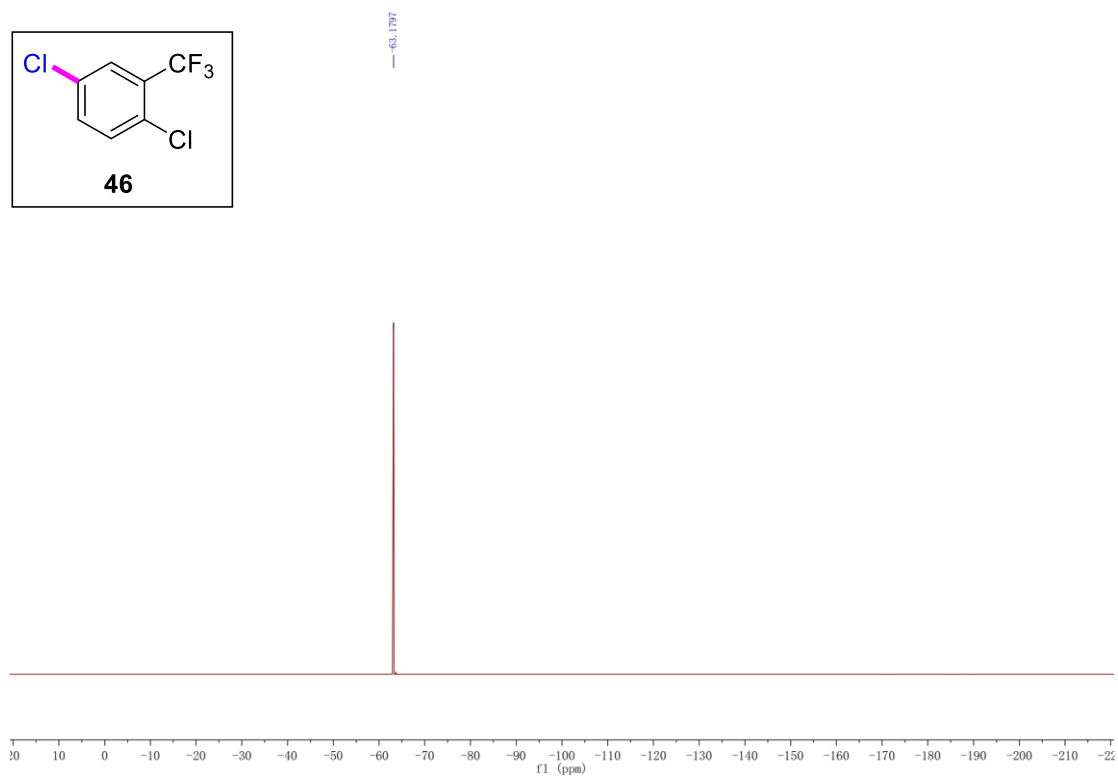

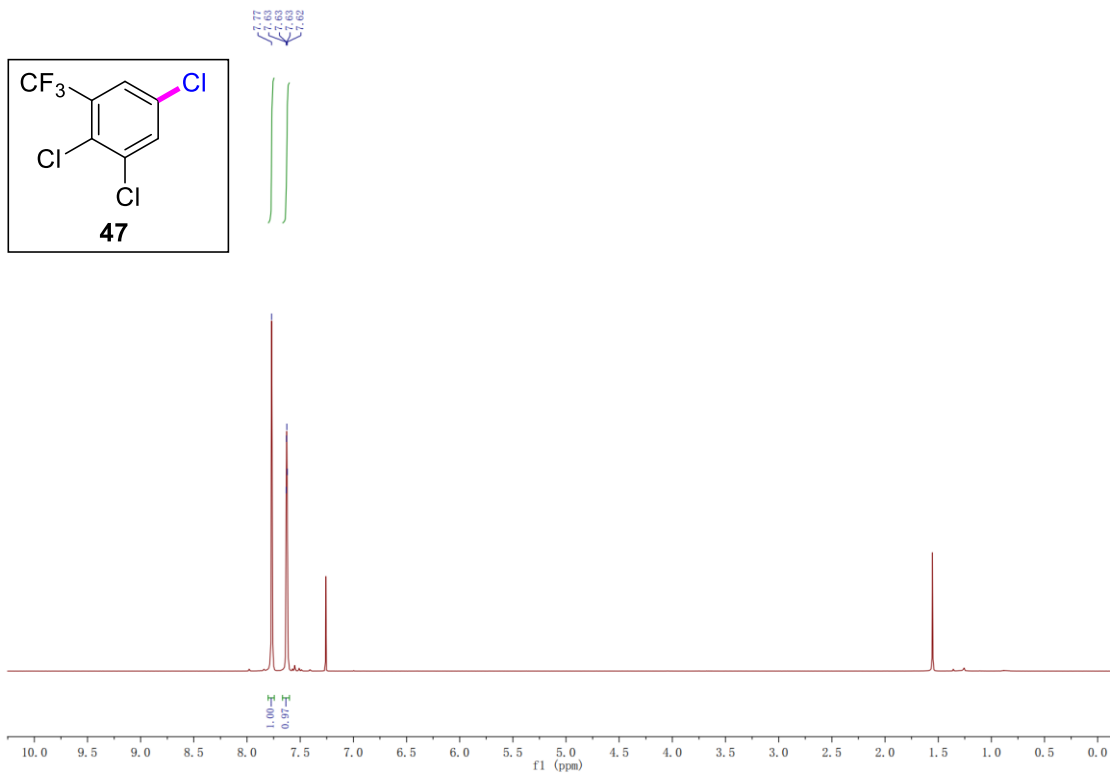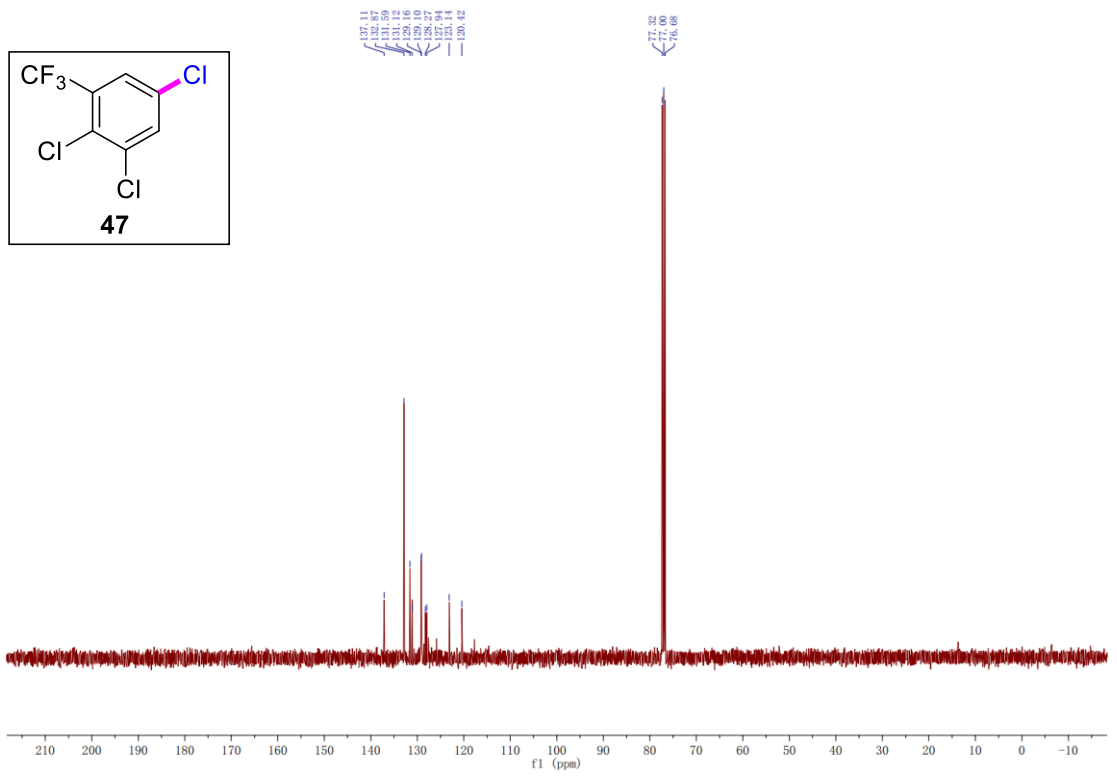

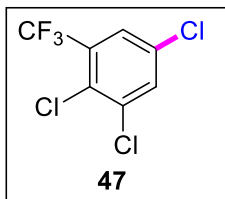

72.8  
72.6  
72.4  
72.2  
72.0

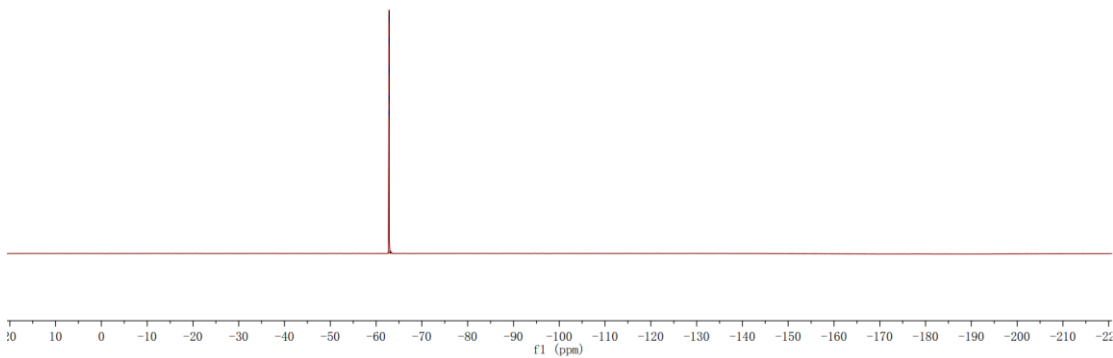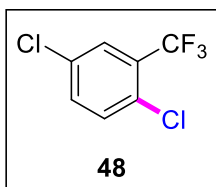

7.6910  
7.6877

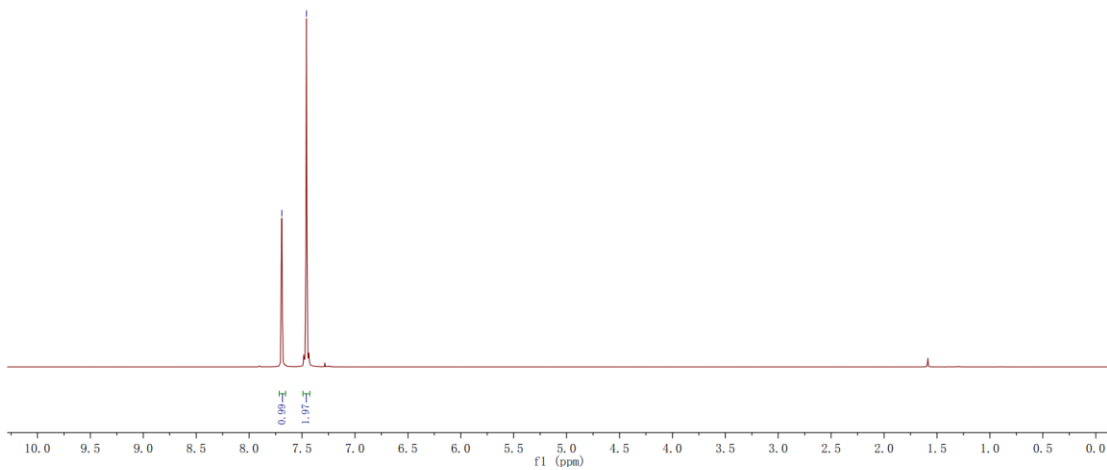



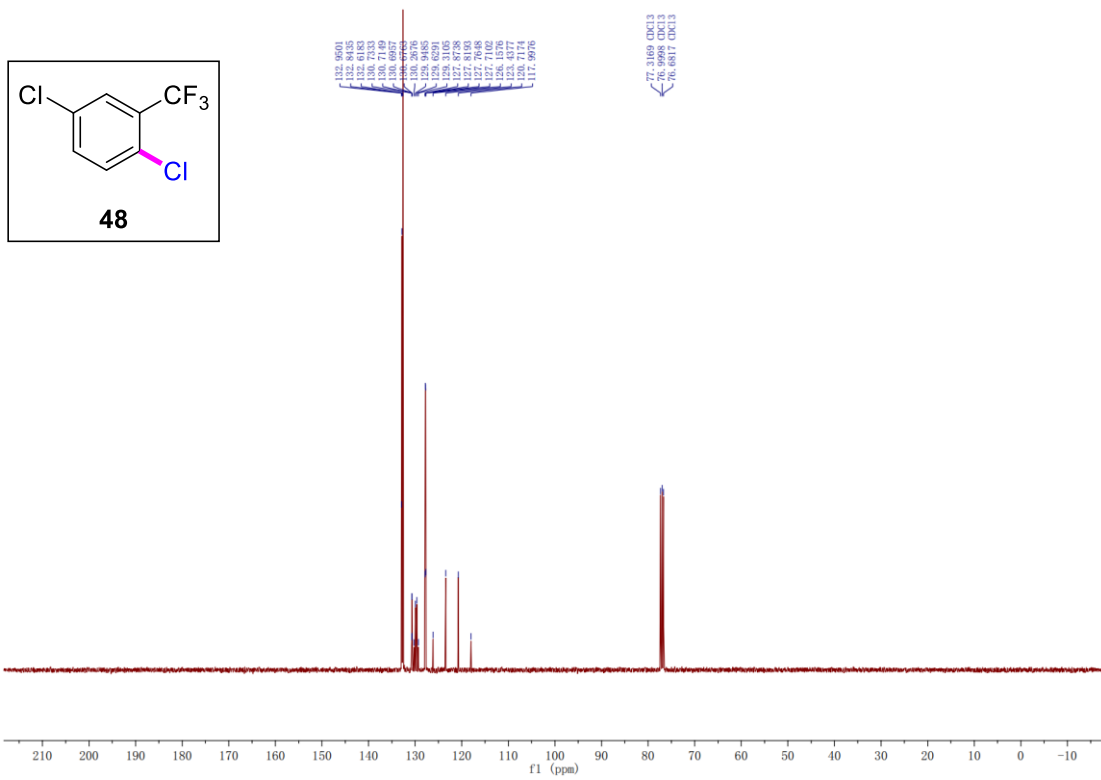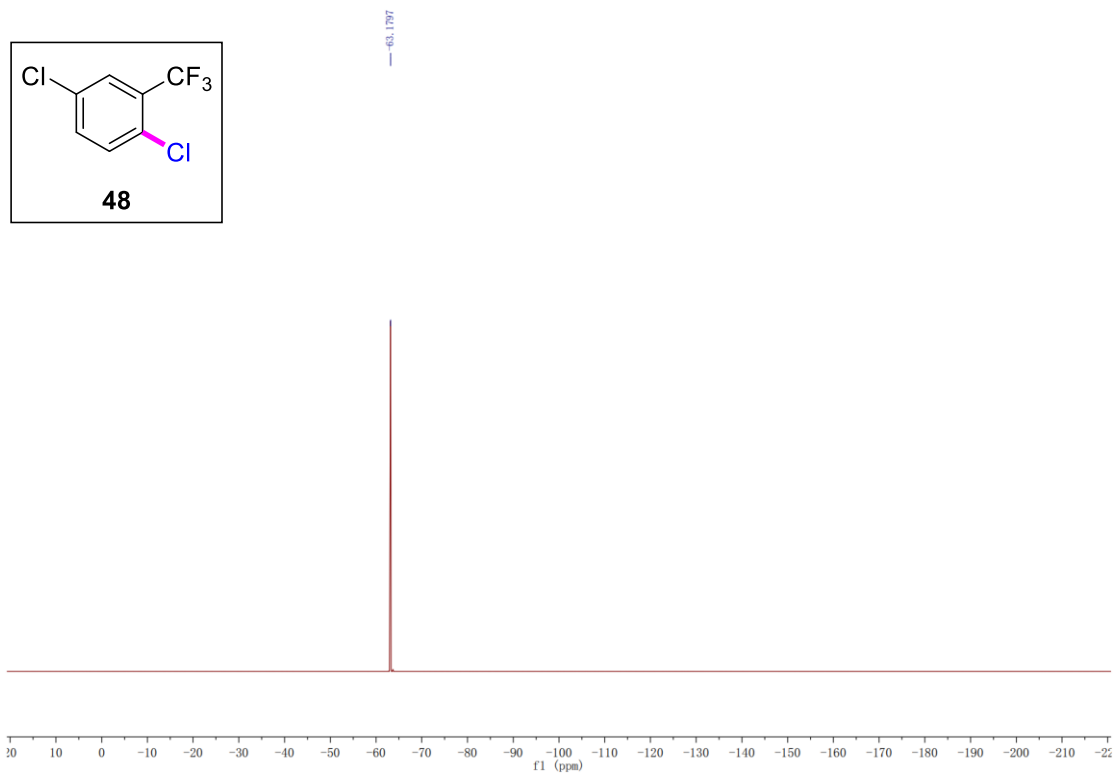

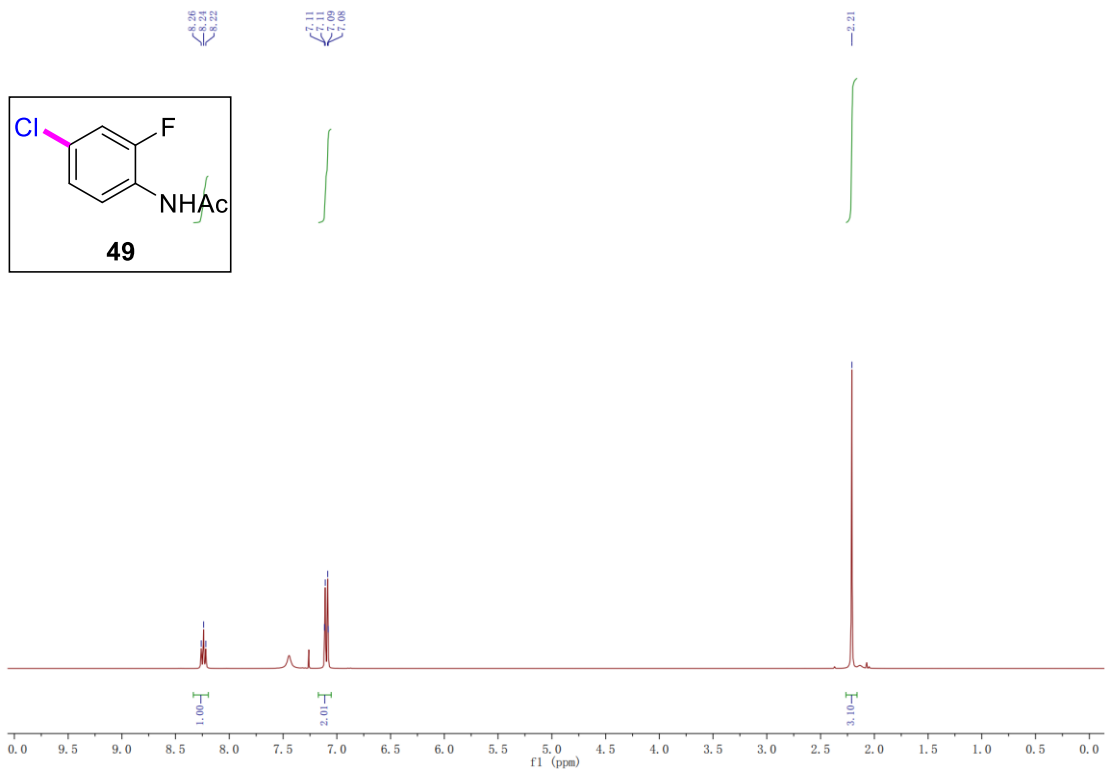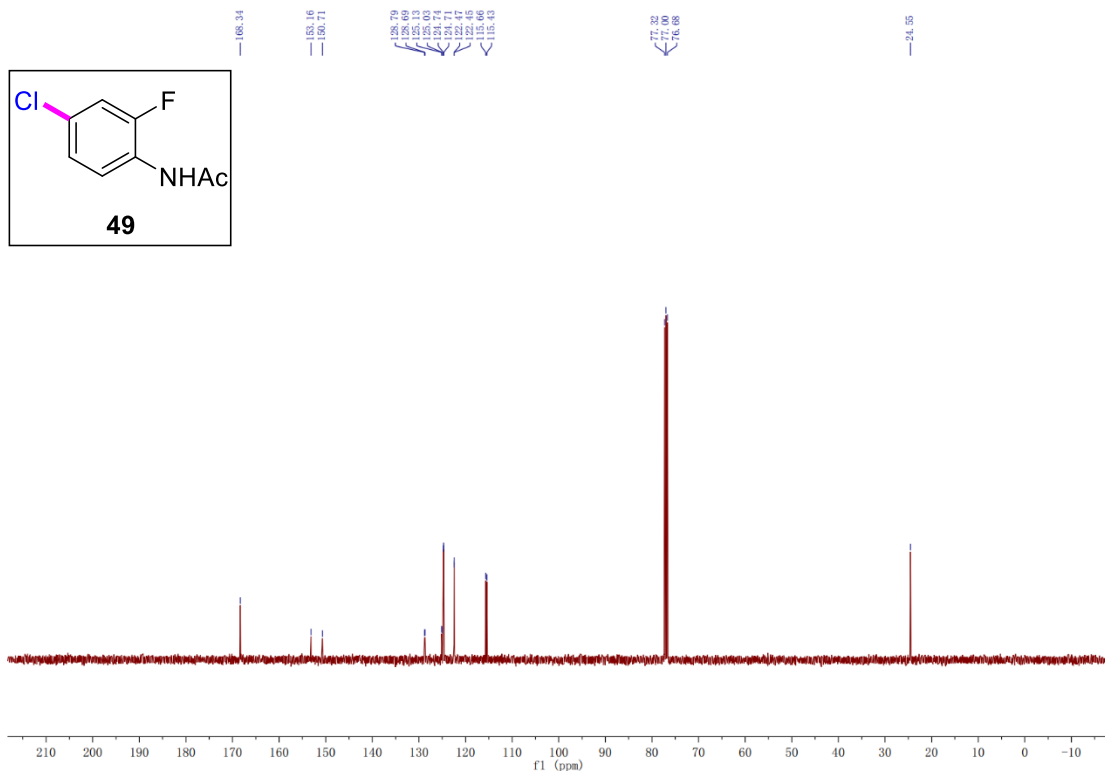



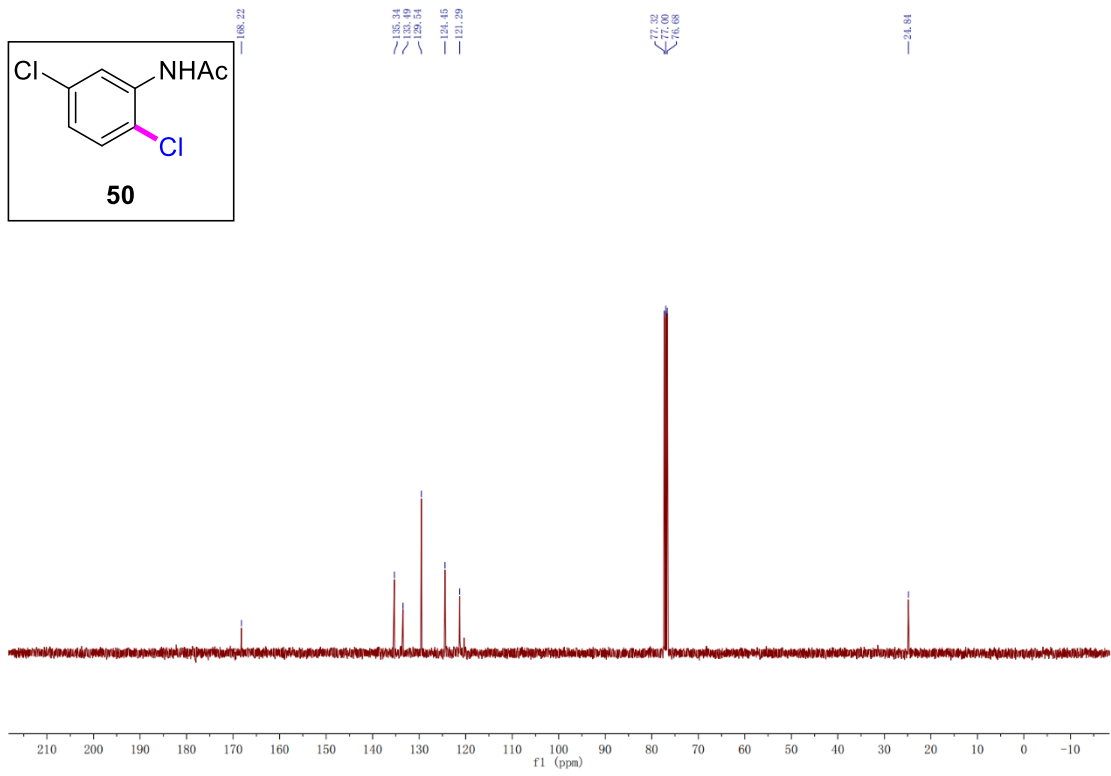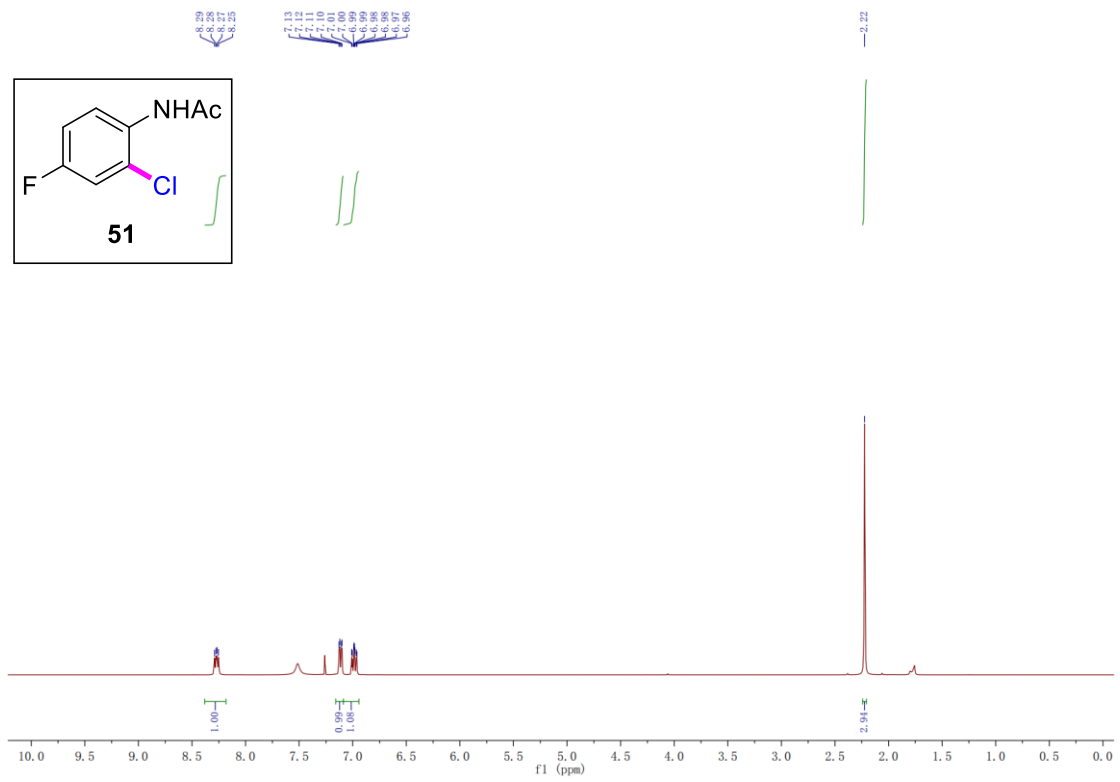

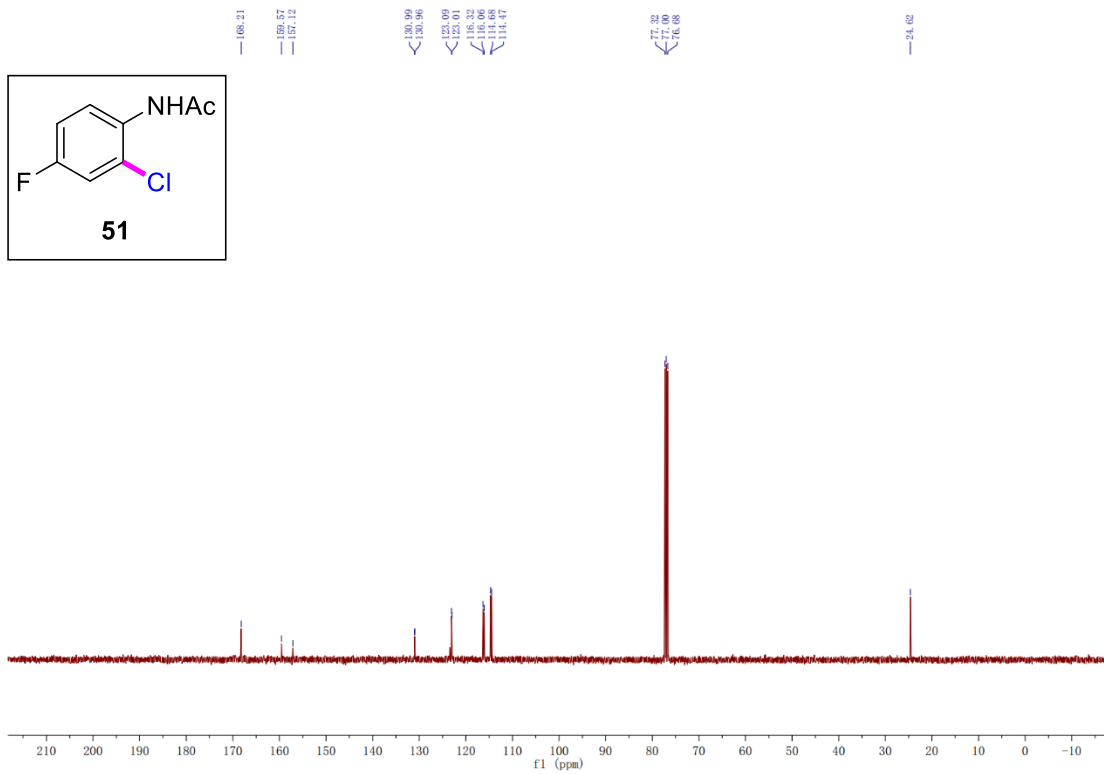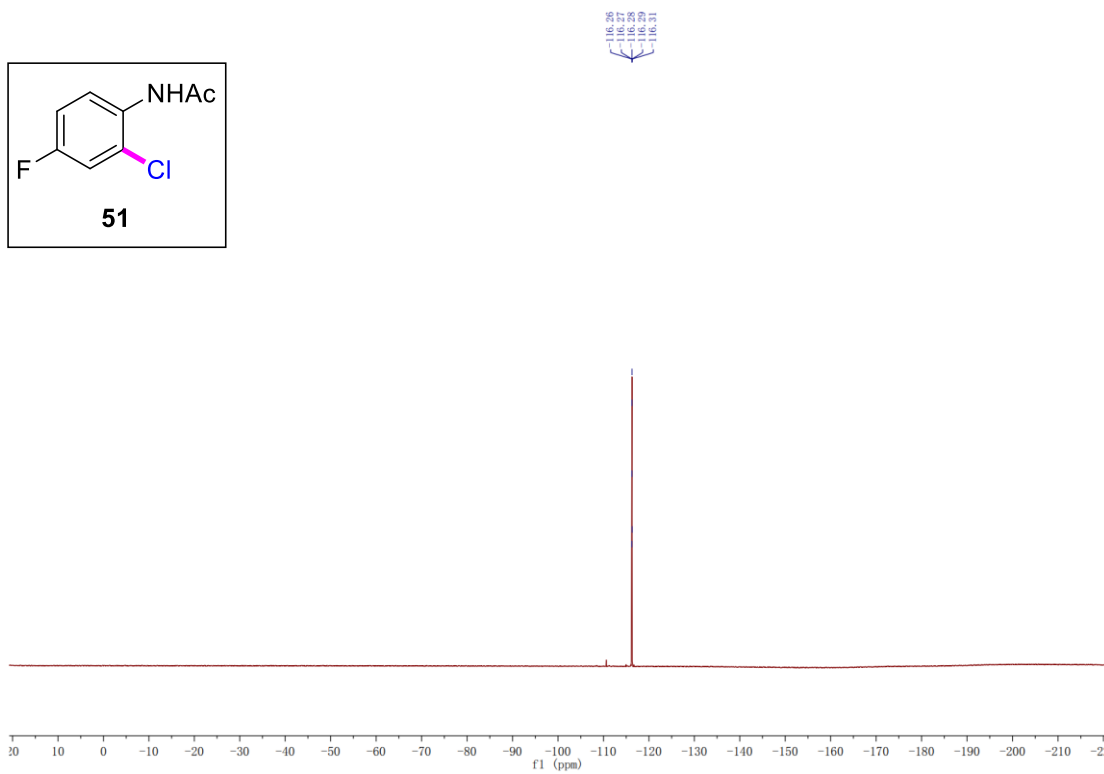

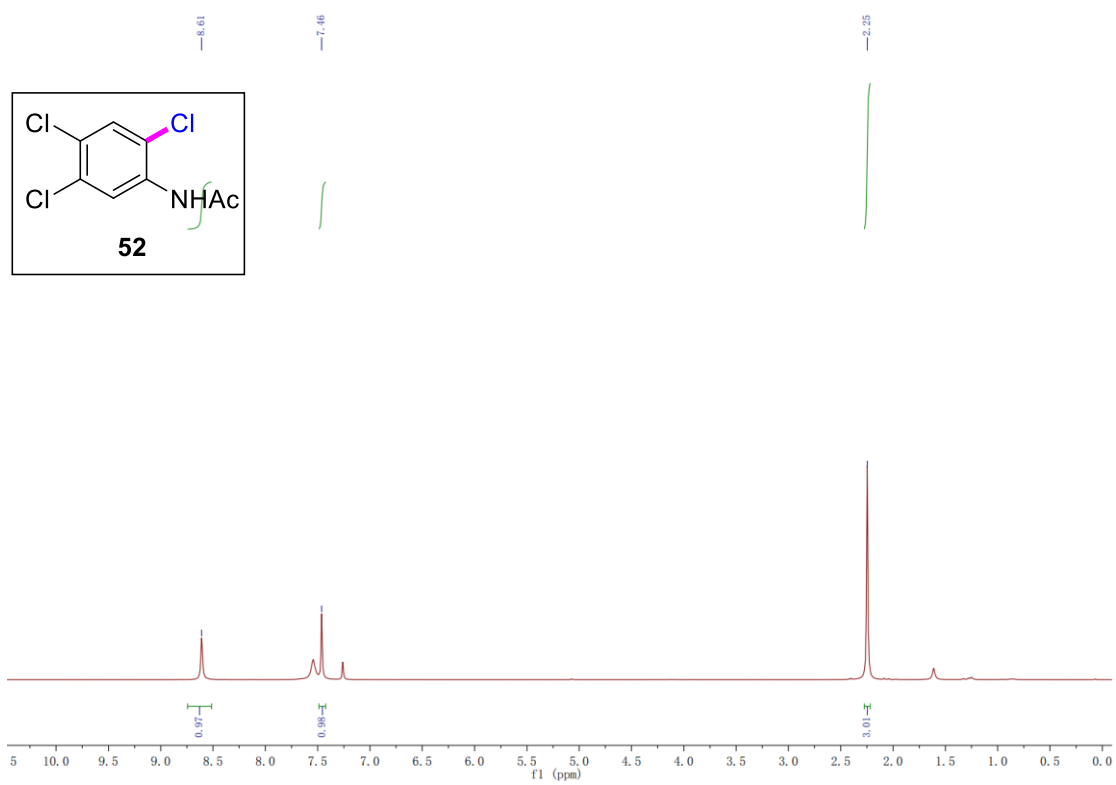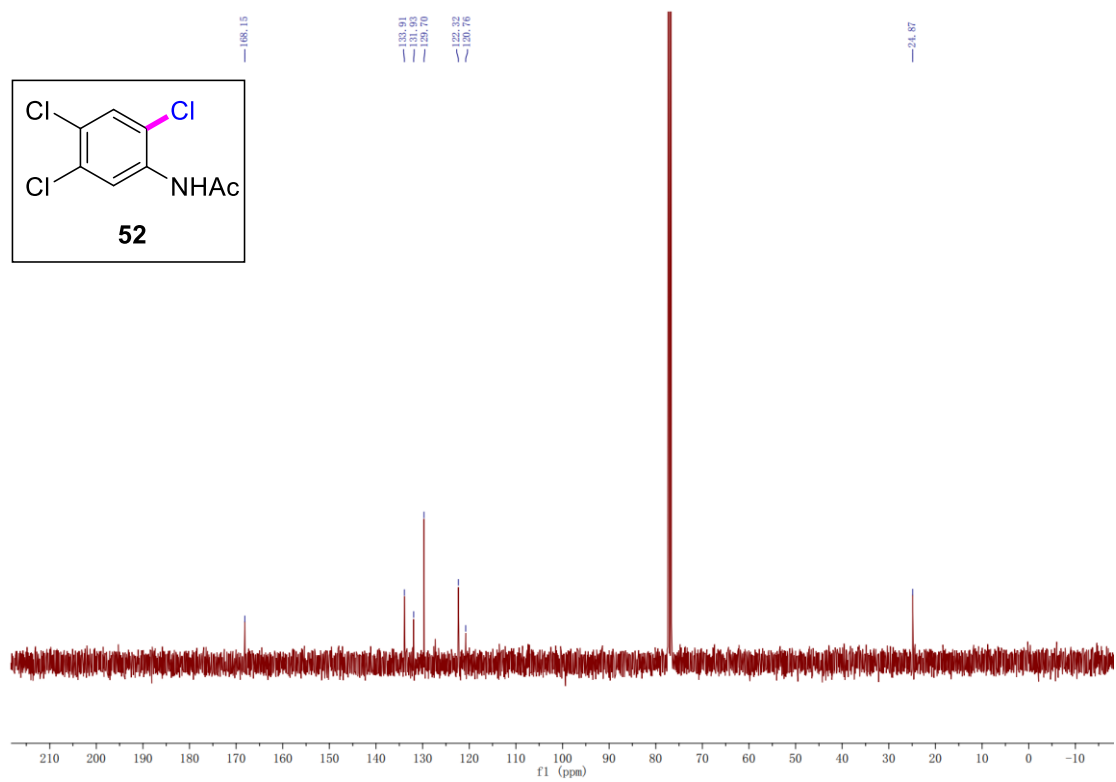

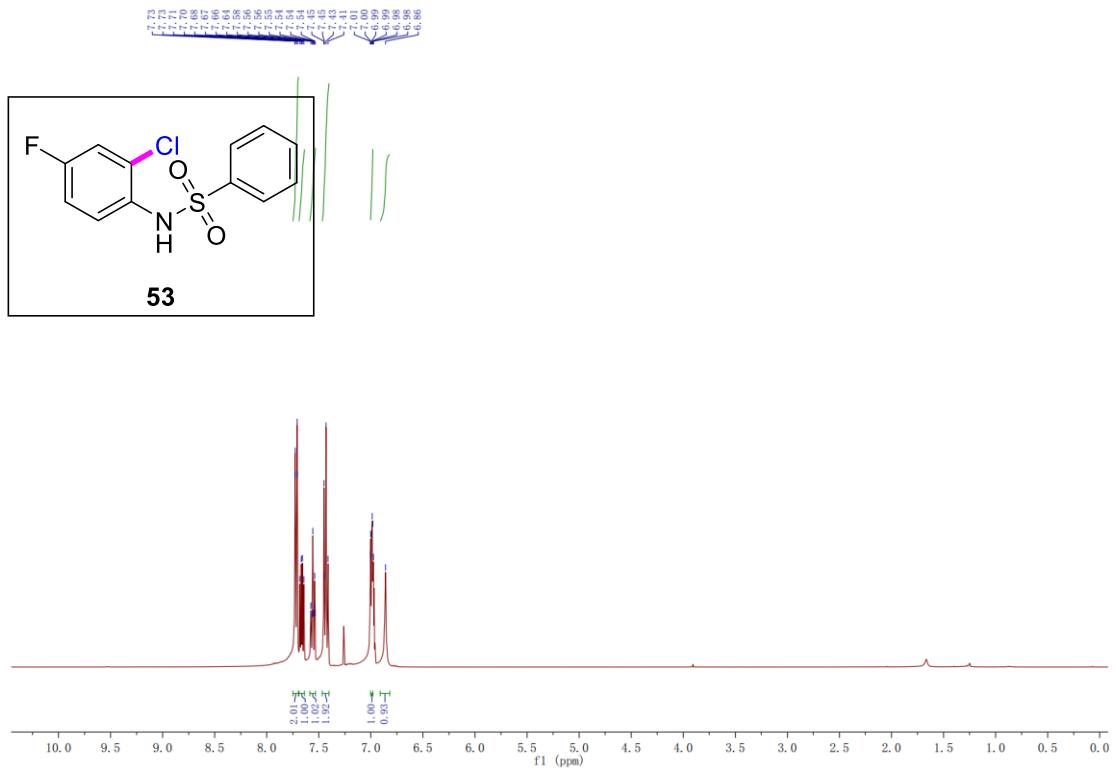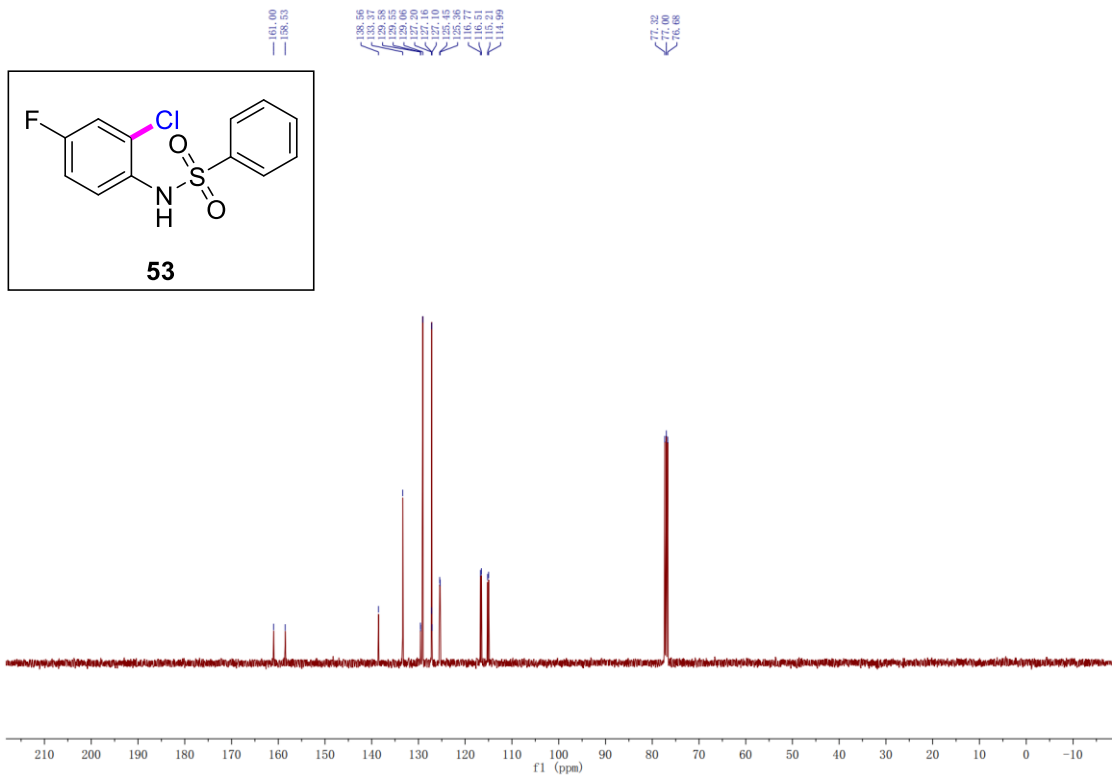

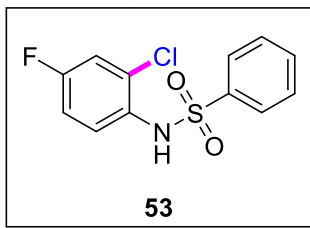

113.76  
113.78  
113.80  
113.82

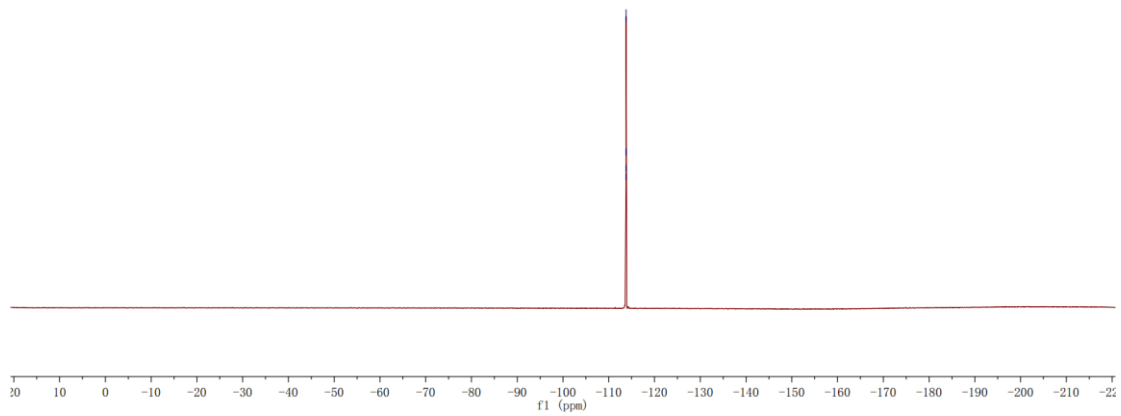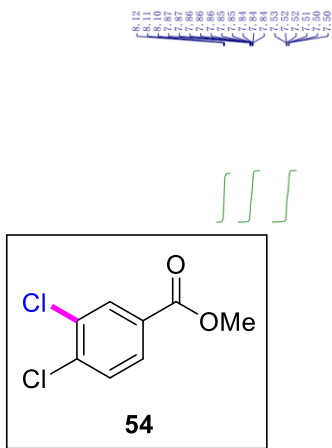

7.11, 7.12, 7.13, 7.14, 7.15, 7.16, 7.17, 7.18, 7.19, 7.20, 7.21, 7.22, 7.23, 7.24, 7.25, 7.26, 7.27, 7.28, 7.29, 7.30, 7.31, 7.32, 7.33, 7.34, 7.35, 7.36, 7.37, 7.38, 7.39, 7.40, 7.41, 7.42, 7.43, 7.44, 7.45, 7.46, 7.47, 7.48, 7.49, 7.50, 7.51, 7.52, 7.53, 7.54, 7.55, 7.56, 7.57, 7.58, 7.59, 7.60, 7.61, 7.62, 7.63, 7.64, 7.65, 7.66, 7.67, 7.68, 7.69, 7.70, 7.71, 7.72, 7.73, 7.74, 7.75, 7.76, 7.77, 7.78, 7.79, 7.80, 7.81, 7.82, 7.83, 7.84, 7.85, 7.86, 7.87, 7.88, 7.89, 7.90, 7.91, 7.92, 7.93, 7.94, 7.95, 7.96, 7.97, 7.98, 7.99, 8.00, 8.01, 8.02, 8.03, 8.04, 8.05, 8.06, 8.07, 8.08, 8.09, 8.10, 8.11, 8.12, 8.13, 8.14, 8.15, 8.16, 8.17, 8.18, 8.19, 8.20, 8.21, 8.22, 8.23, 8.24, 8.25, 8.26, 8.27, 8.28, 8.29, 8.30, 8.31, 8.32, 8.33, 8.34, 8.35, 8.36, 8.37, 8.38, 8.39, 8.40, 8.41, 8.42, 8.43, 8.44, 8.45, 8.46, 8.47, 8.48, 8.49, 8.50, 8.51, 8.52, 8.53, 8.54, 8.55, 8.56, 8.57, 8.58, 8.59, 8.60, 8.61, 8.62, 8.63, 8.64, 8.65, 8.66, 8.67, 8.68, 8.69, 8.70, 8.71, 8.72, 8.73, 8.74, 8.75, 8.76, 8.77, 8.78, 8.79, 8.80, 8.81, 8.82, 8.83, 8.84, 8.85, 8.86, 8.87, 8.88, 8.89, 8.90, 8.91, 8.92, 8.93, 8.94, 8.95, 8.96, 8.97, 8.98, 8.99, 9.00, 9.01, 9.02, 9.03, 9.04, 9.05, 9.06, 9.07, 9.08, 9.09, 9.10, 9.11, 9.12, 9.13, 9.14, 9.15, 9.16, 9.17, 9.18, 9.19, 9.20, 9.21, 9.22, 9.23, 9.24, 9.25, 9.26, 9.27, 9.28, 9.29, 9.30, 9.31, 9.32, 9.33, 9.34, 9.35, 9.36, 9.37, 9.38, 9.39, 9.40, 9.41, 9.42, 9.43, 9.44, 9.45, 9.46, 9.47, 9.48, 9.49, 9.50, 9.51, 9.52, 9.53, 9.54, 9.55, 9.56, 9.57, 9.58, 9.59, 9.60, 9.61, 9.62, 9.63, 9.64, 9.65, 9.66, 9.67, 9.68, 9.69, 9.70, 9.71, 9.72, 9.73, 9.74, 9.75, 9.76, 9.77, 9.78, 9.79, 9.80, 9.81, 9.82, 9.83, 9.84, 9.85, 9.86, 9.87, 9.88, 9.89, 9.90, 9.91, 9.92, 9.93, 9.94, 9.95, 9.96, 9.97, 9.98, 9.99, 10.00

3.92

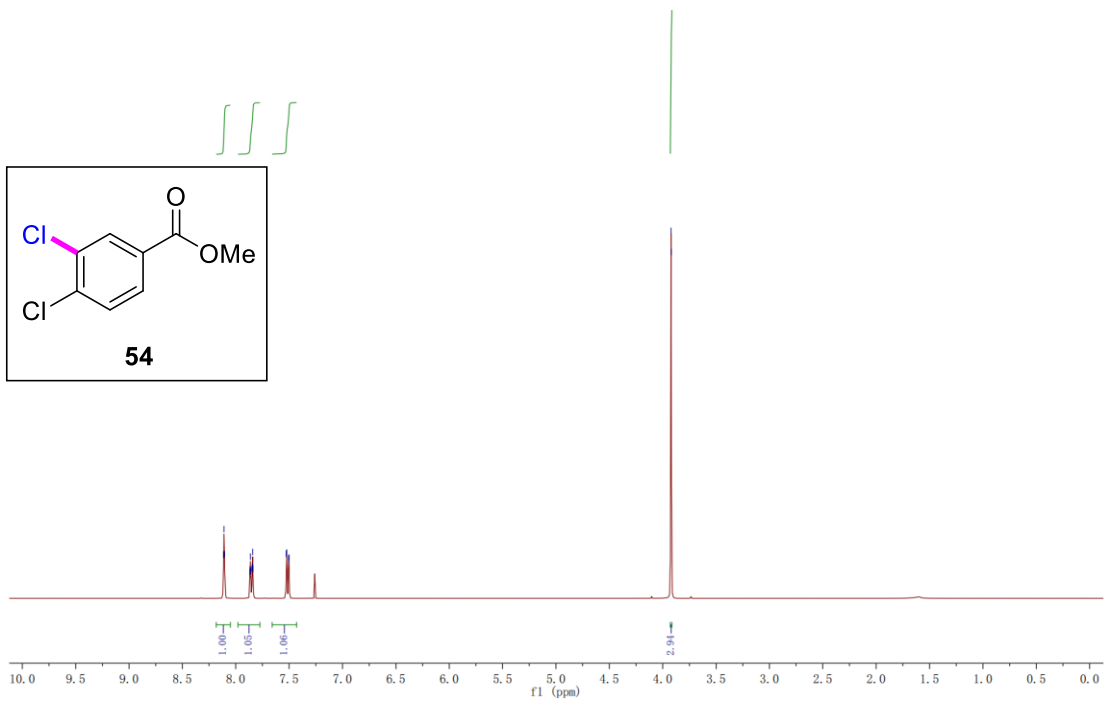



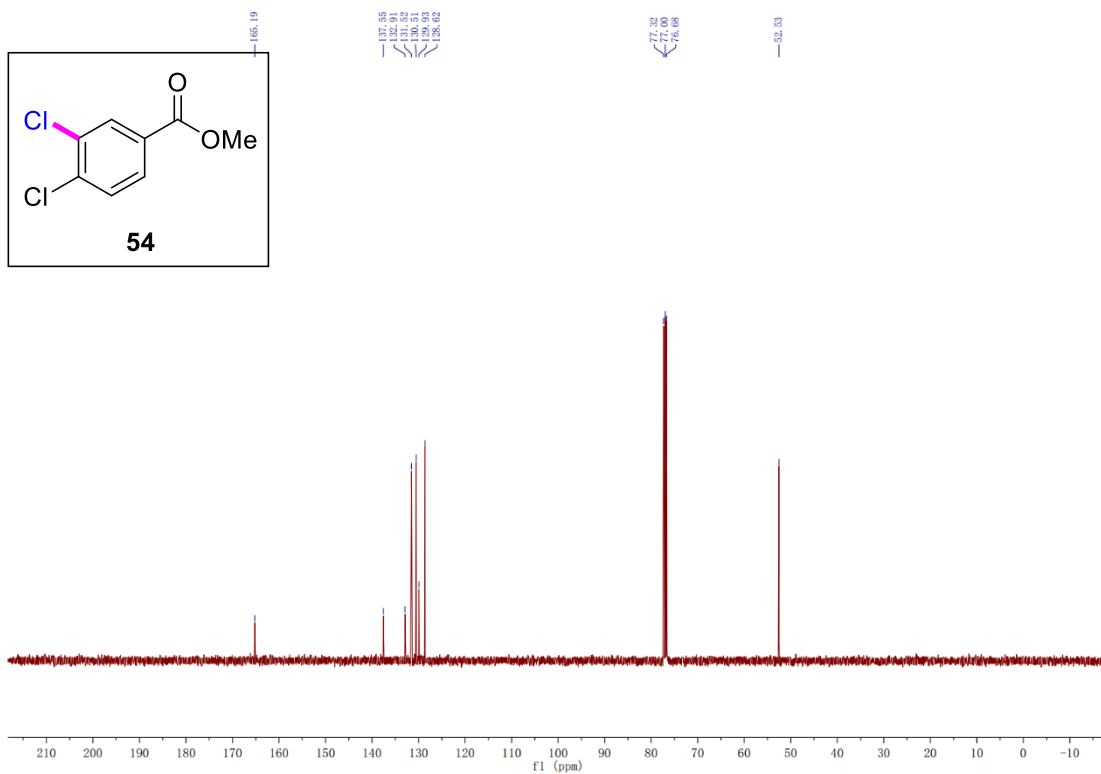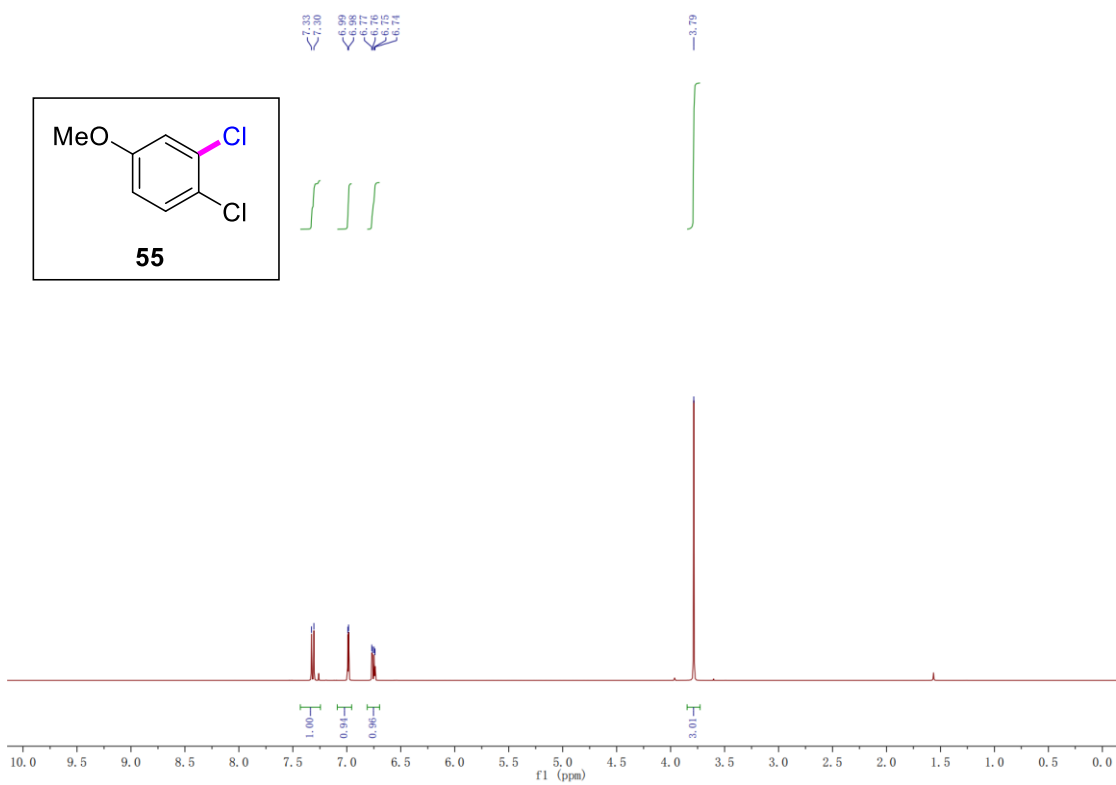

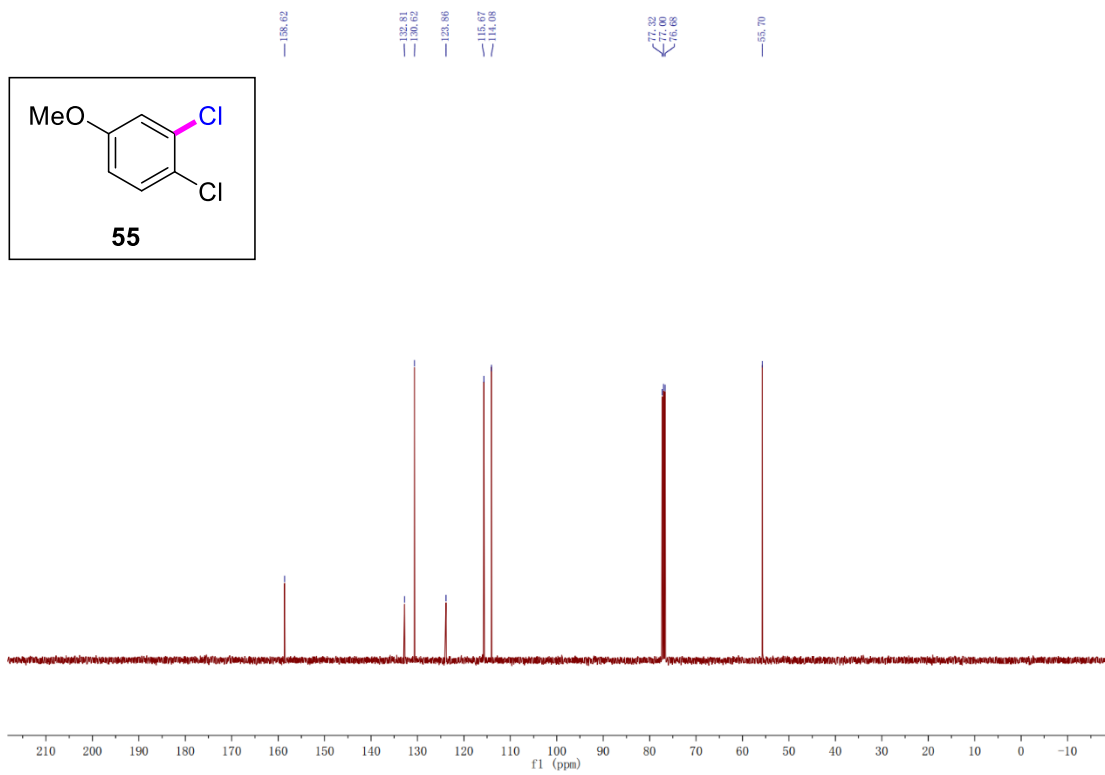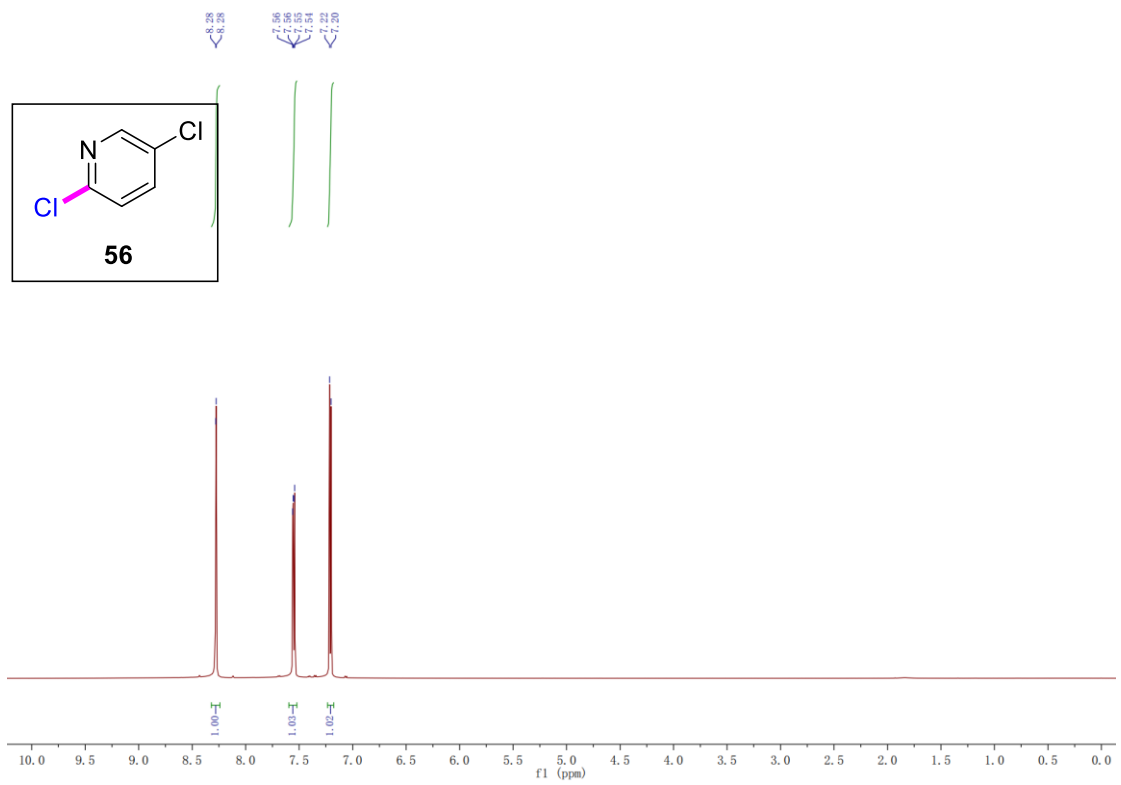

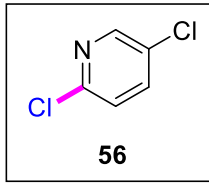

140.38  
138.39  
138.36  
130.85  
128.05  
77.01  
77.00  
76.79

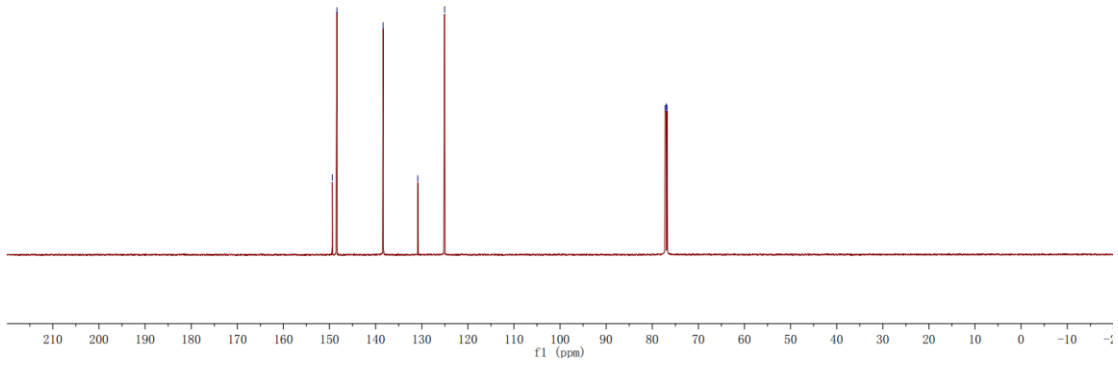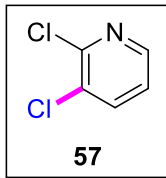

8.31  
8.30  
8.30  
8.29  
8.29  
8.28  
8.28  
8.27  
8.27  
8.26  
8.26  
8.25  
8.25  
8.24  
8.24  
8.23  
8.23  
8.22  
8.22  
8.21  
8.21  
8.20  
8.20  
8.19  
8.19  
8.18

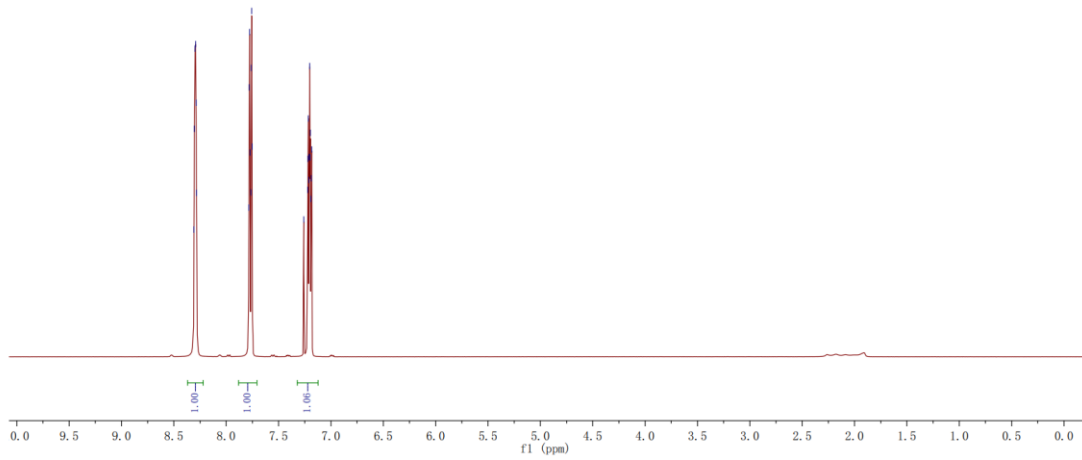

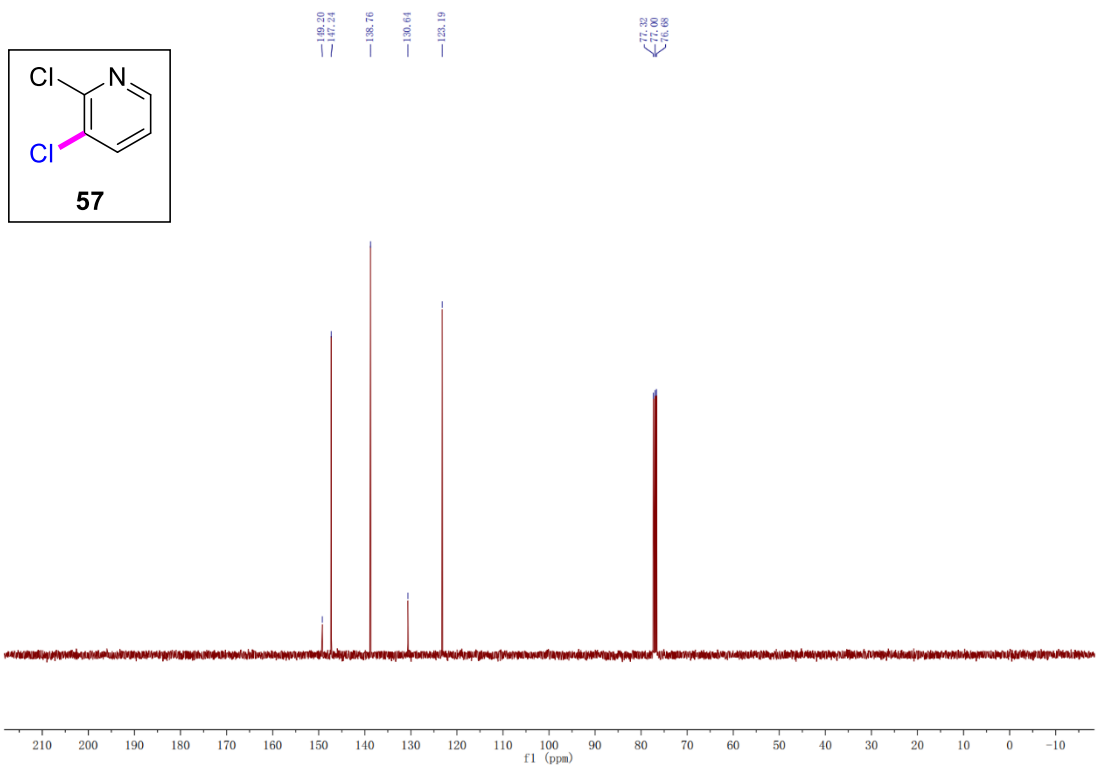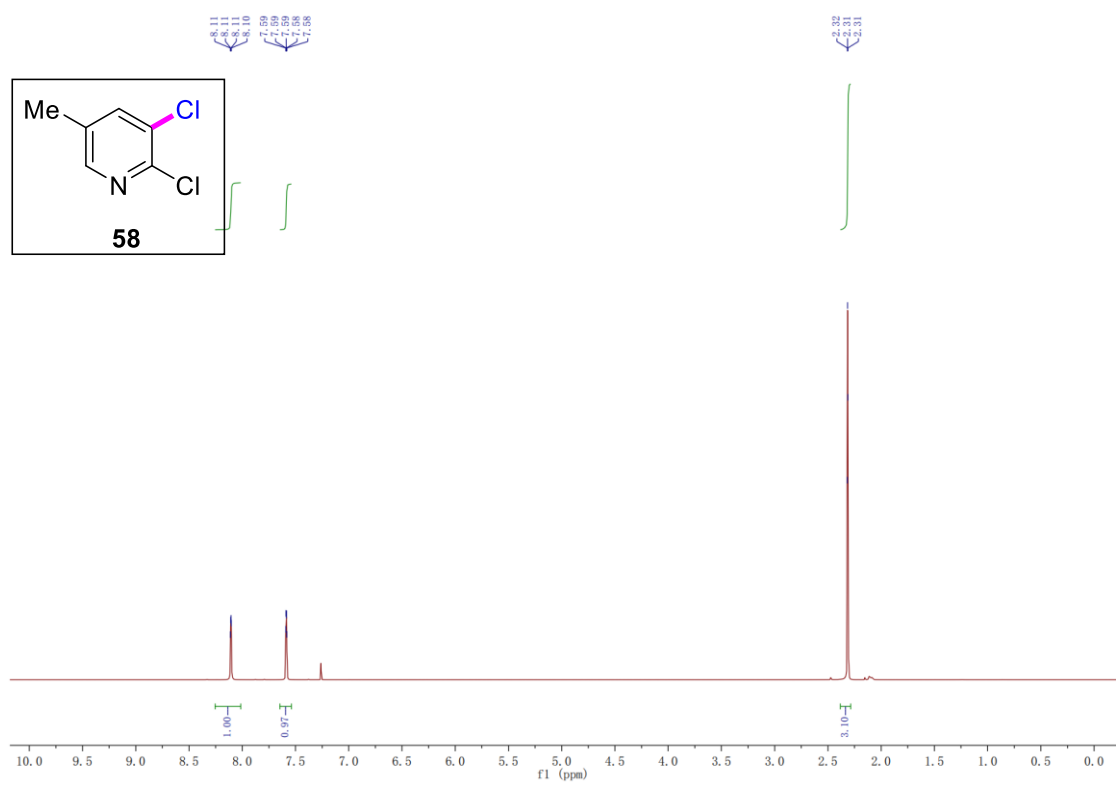

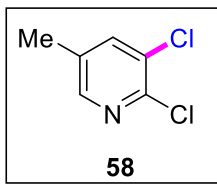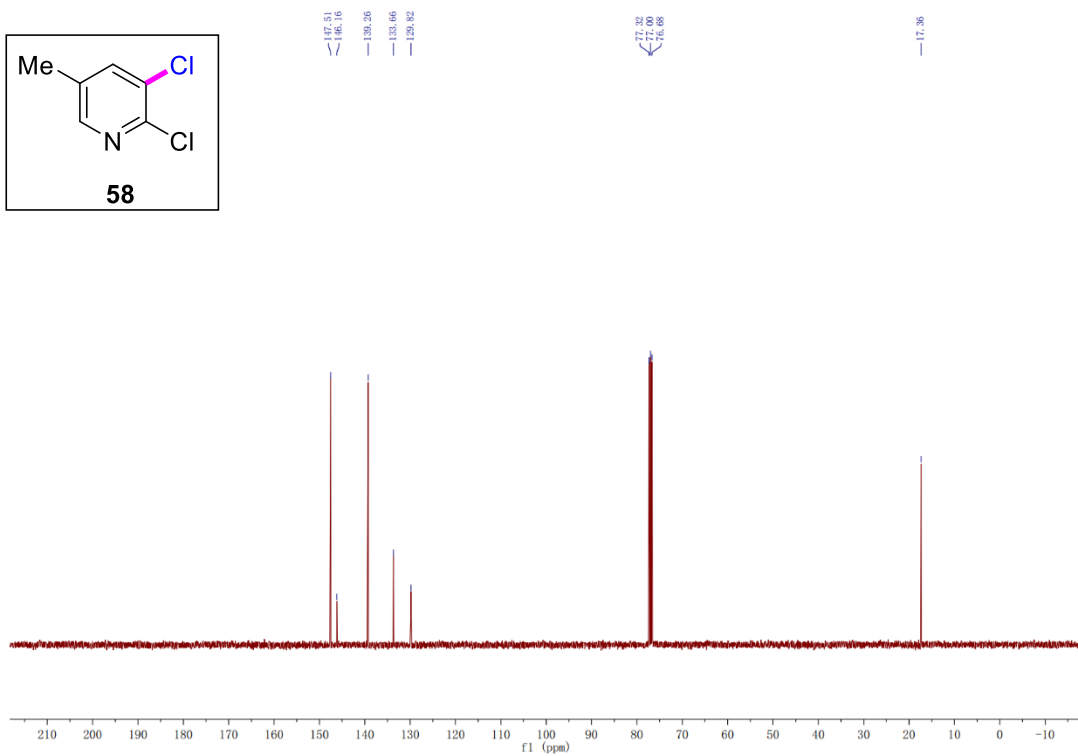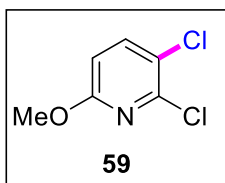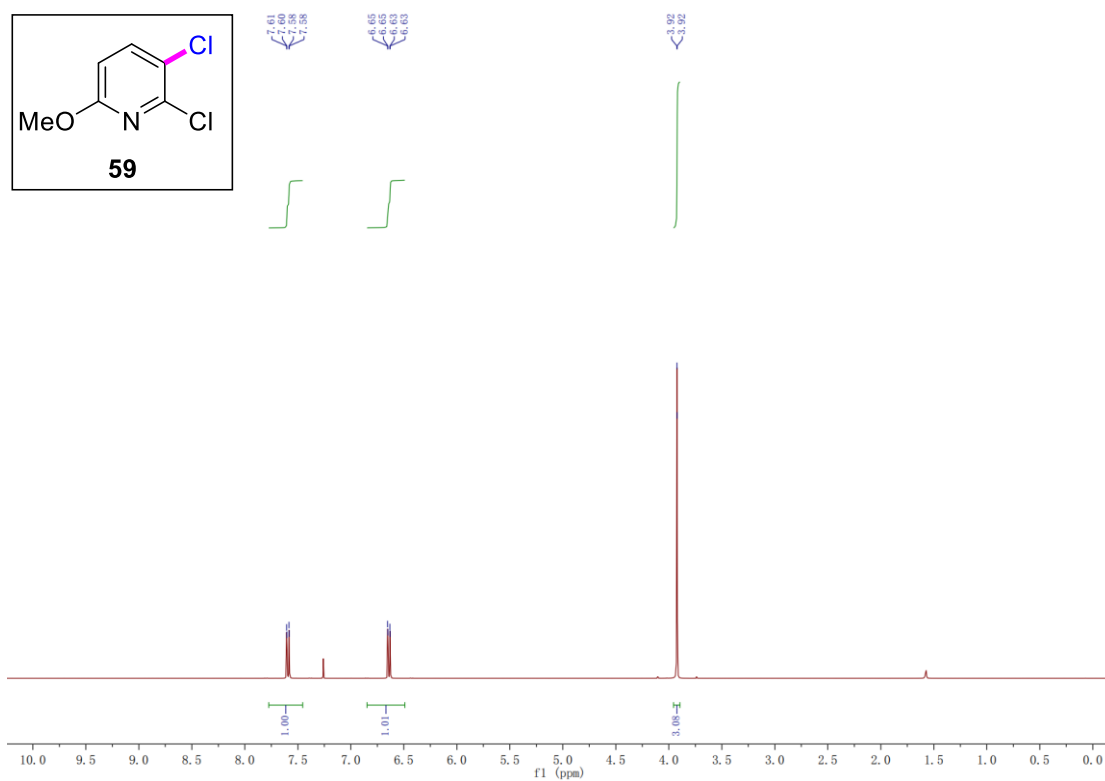

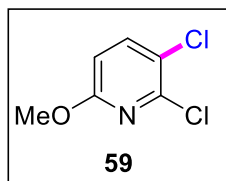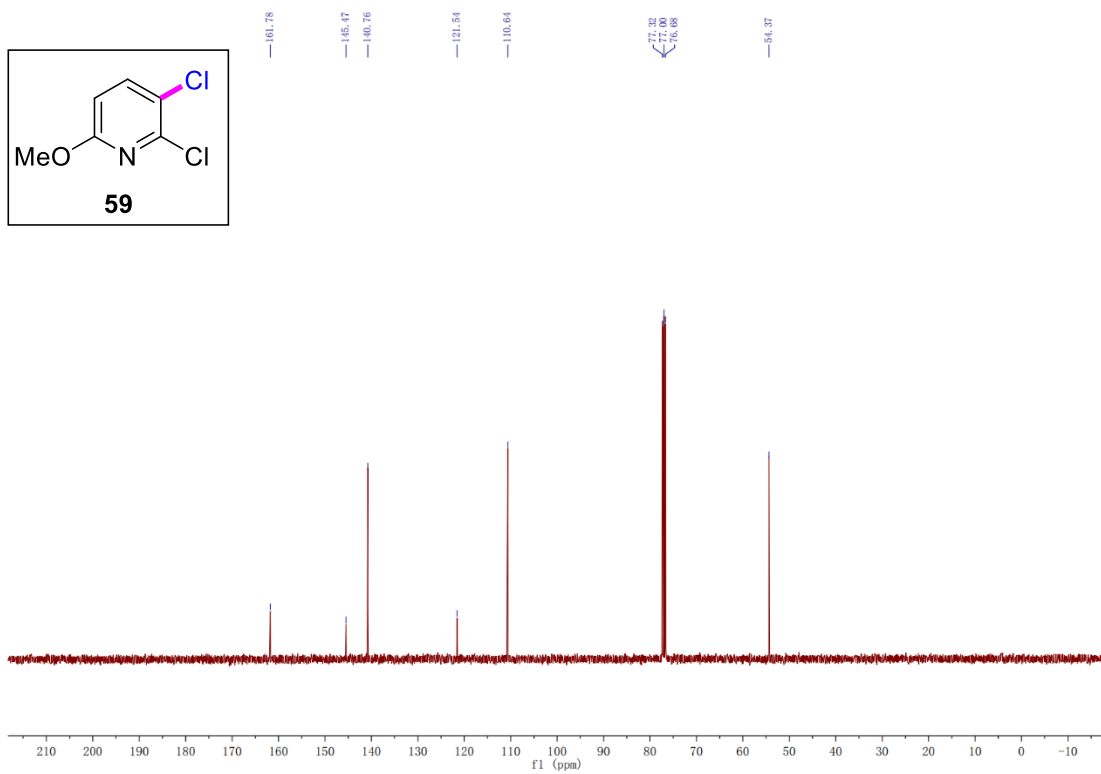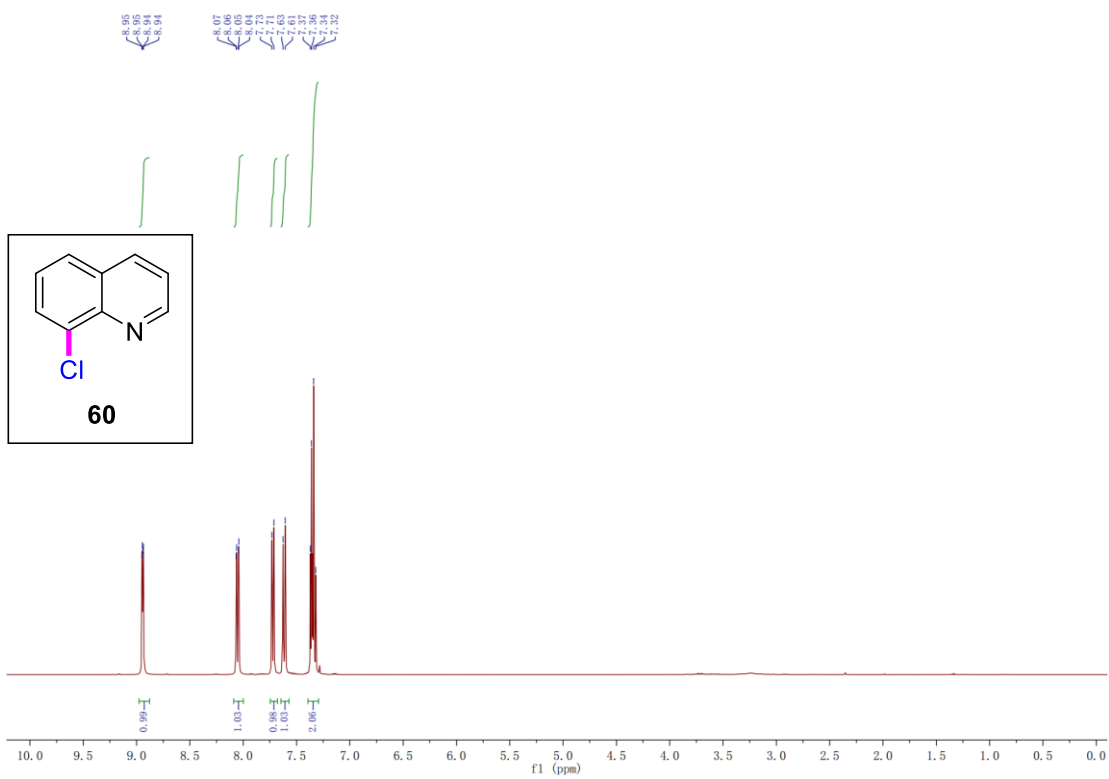

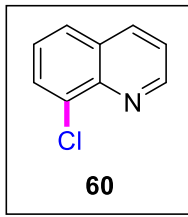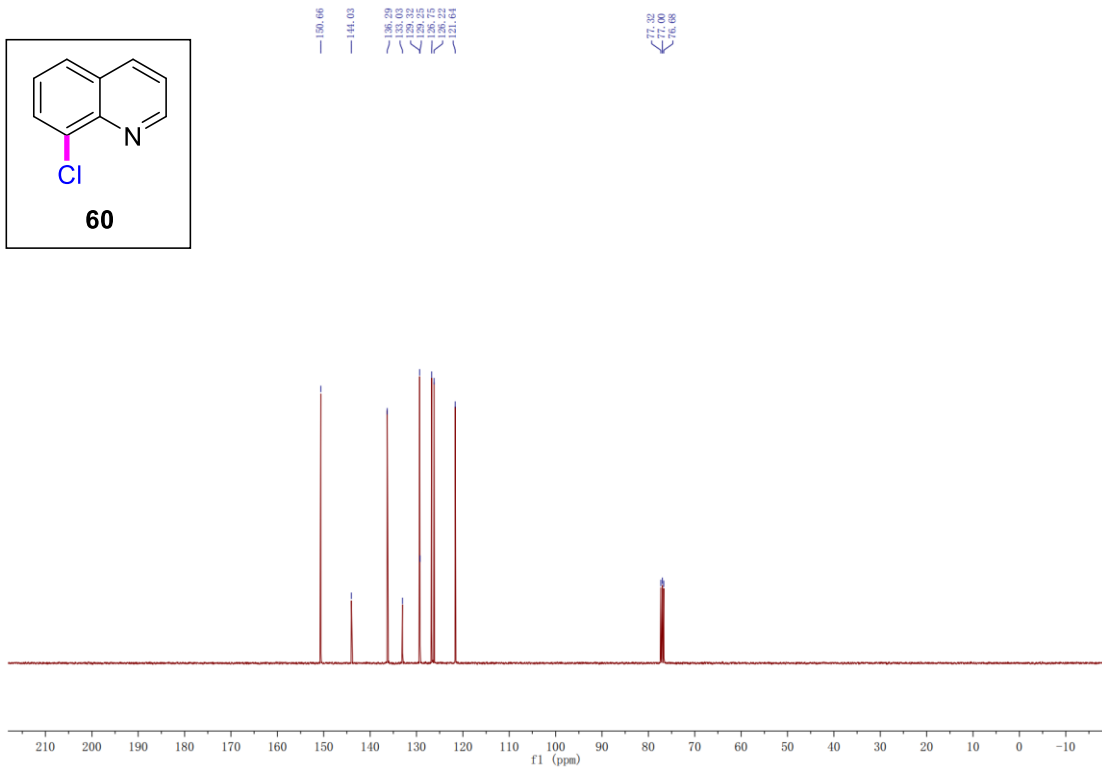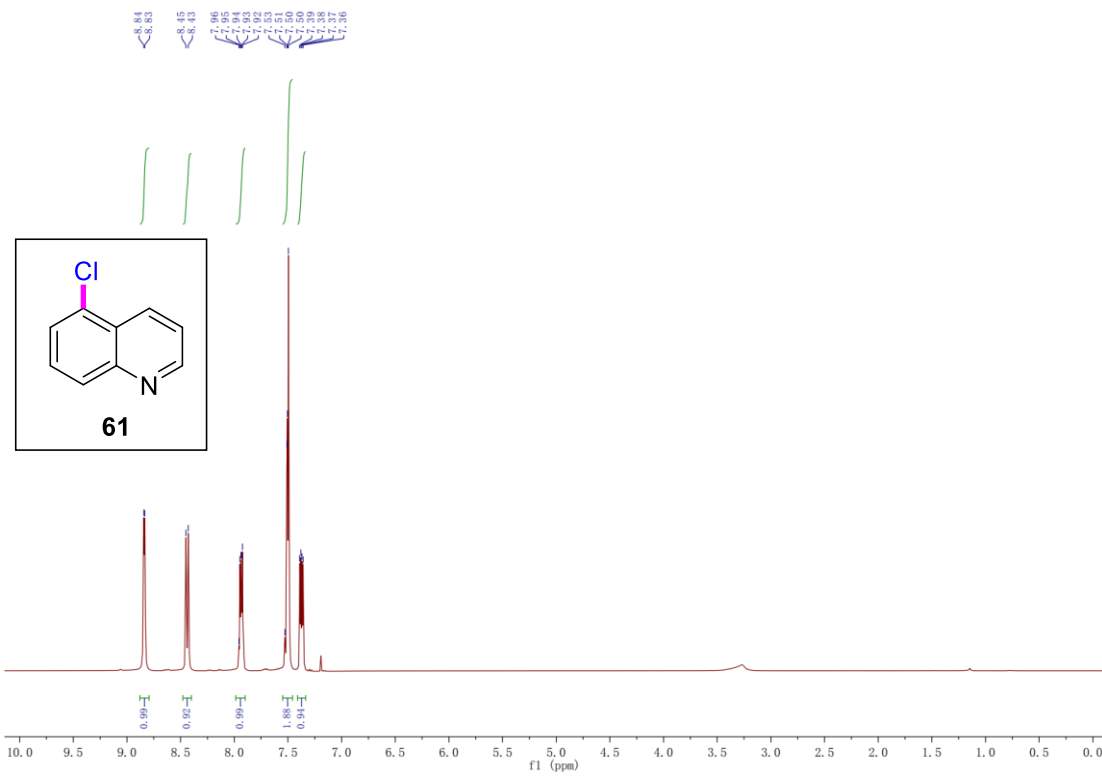

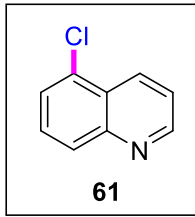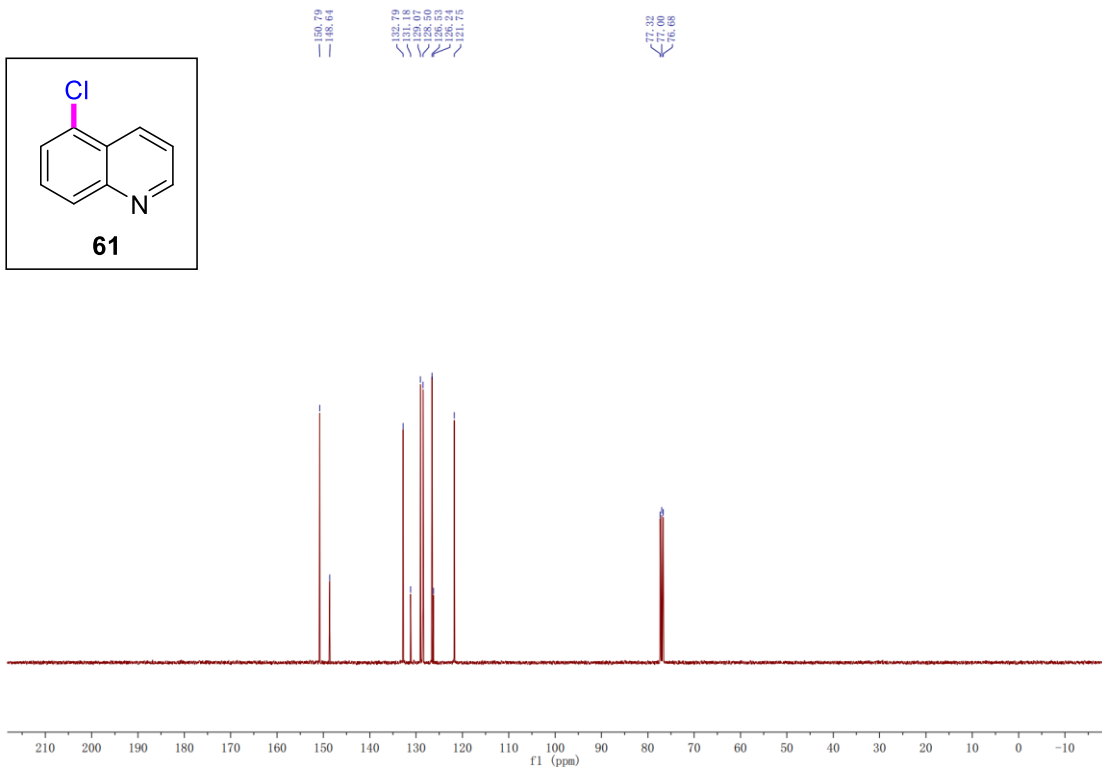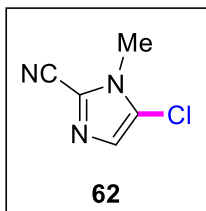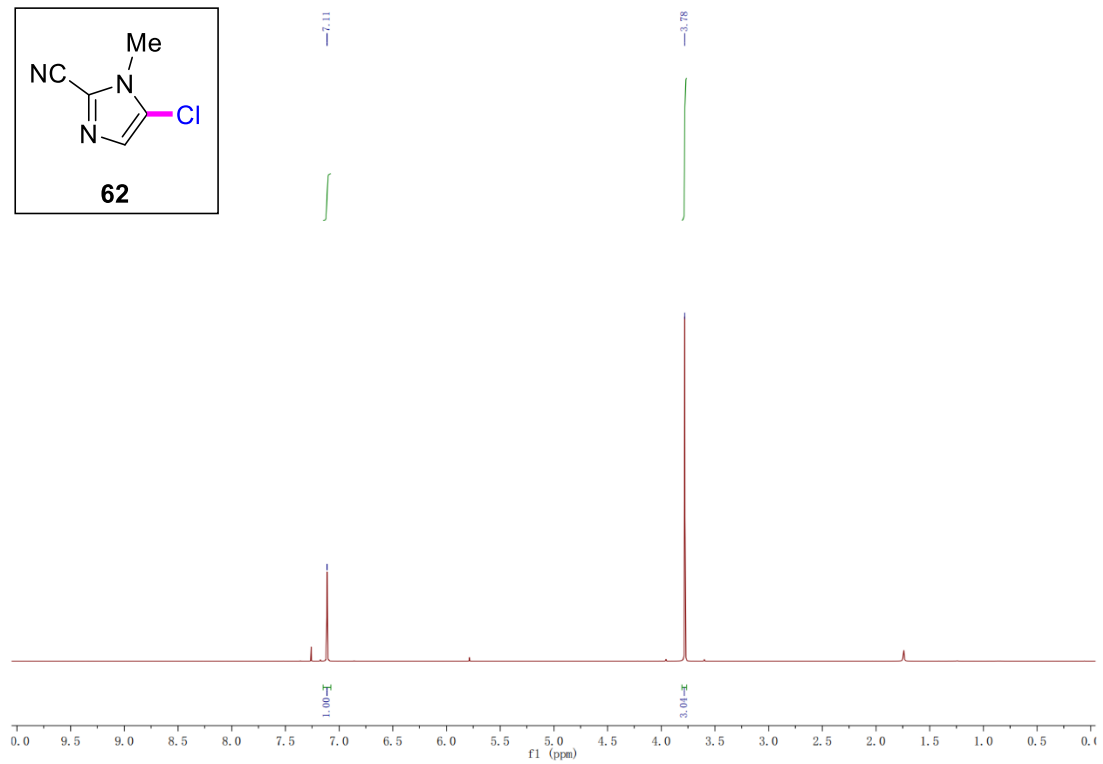



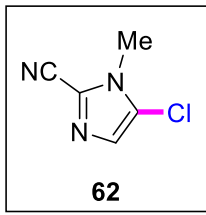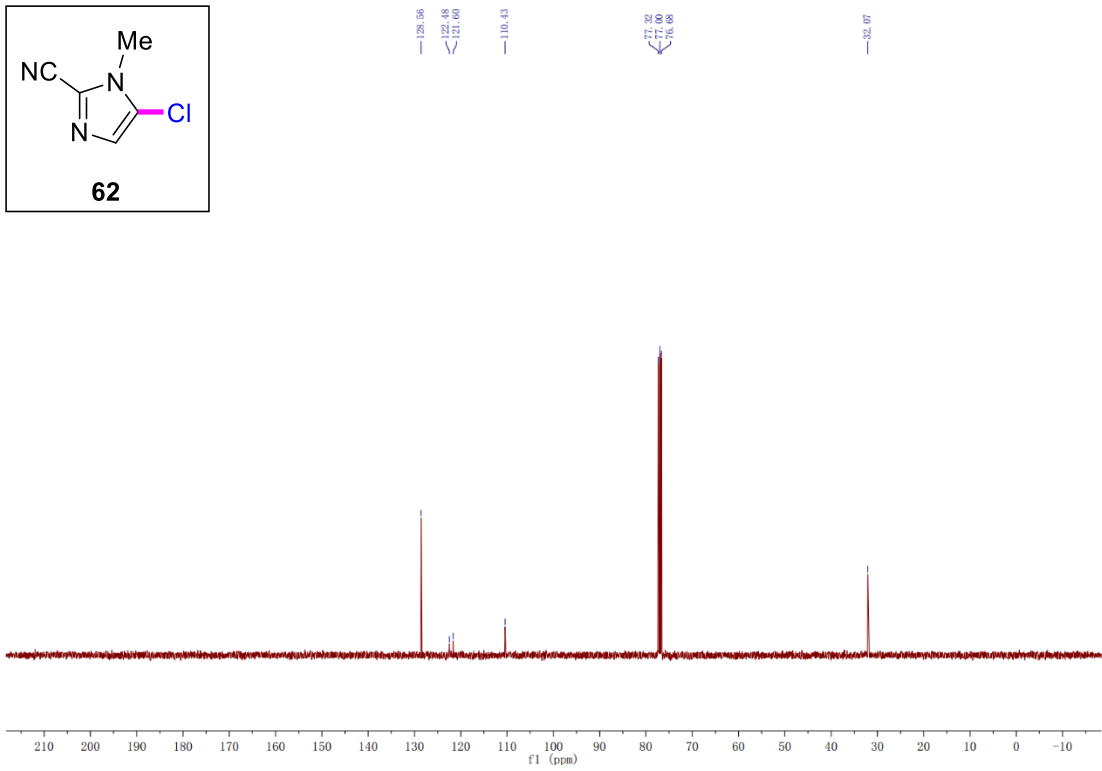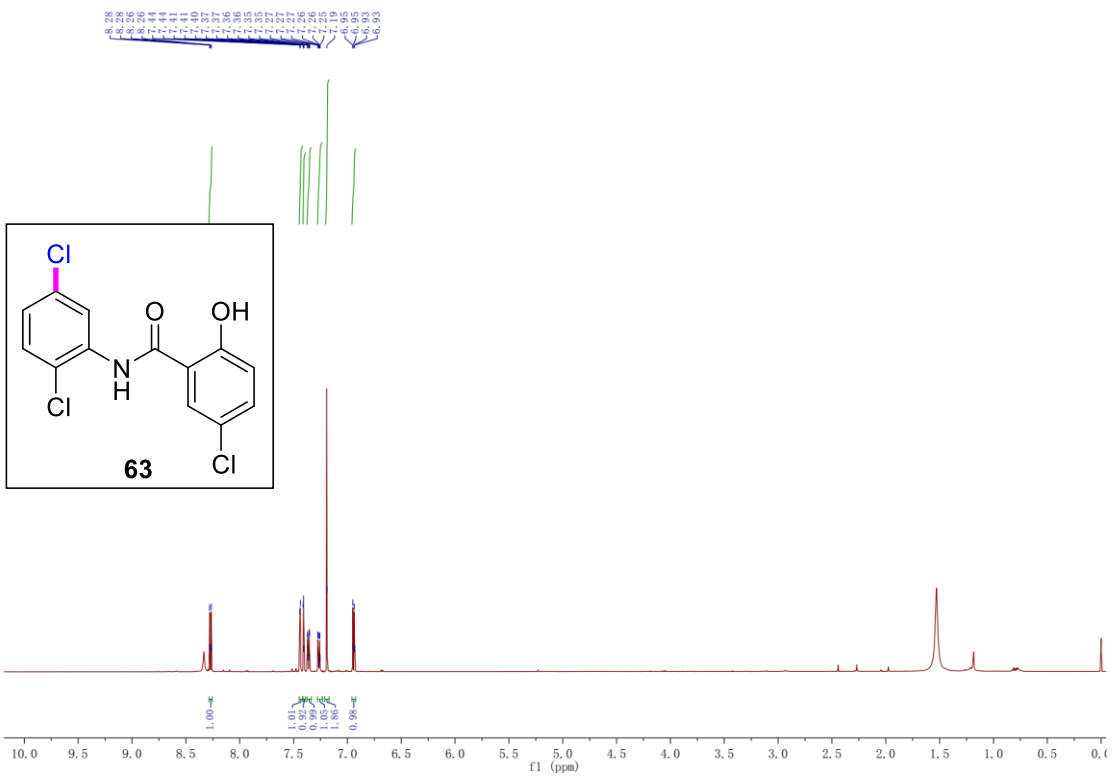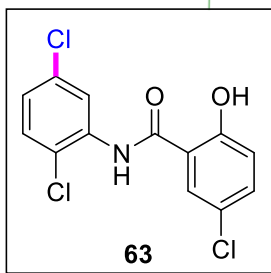

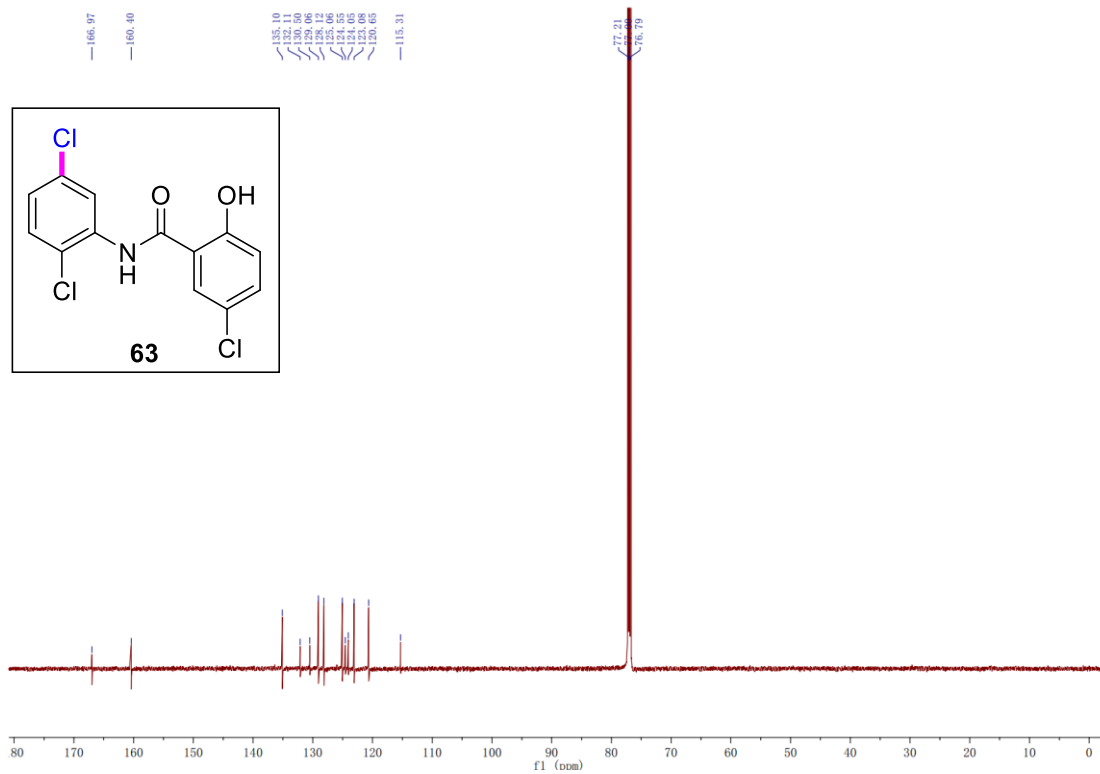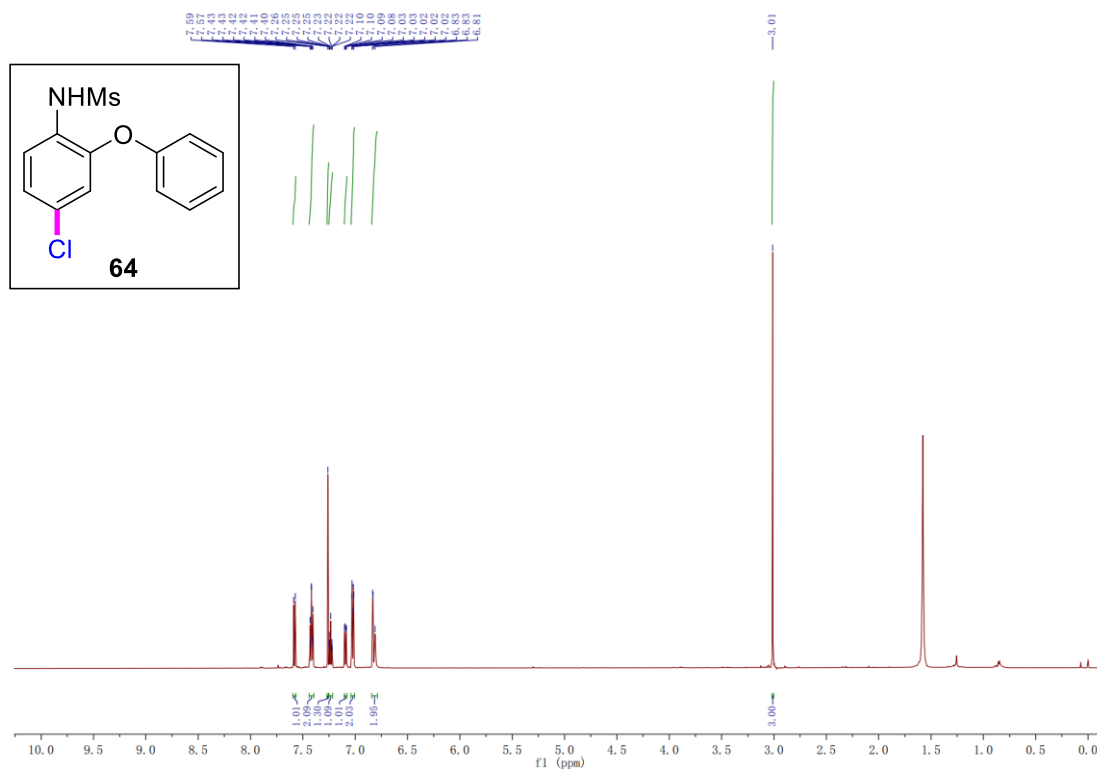

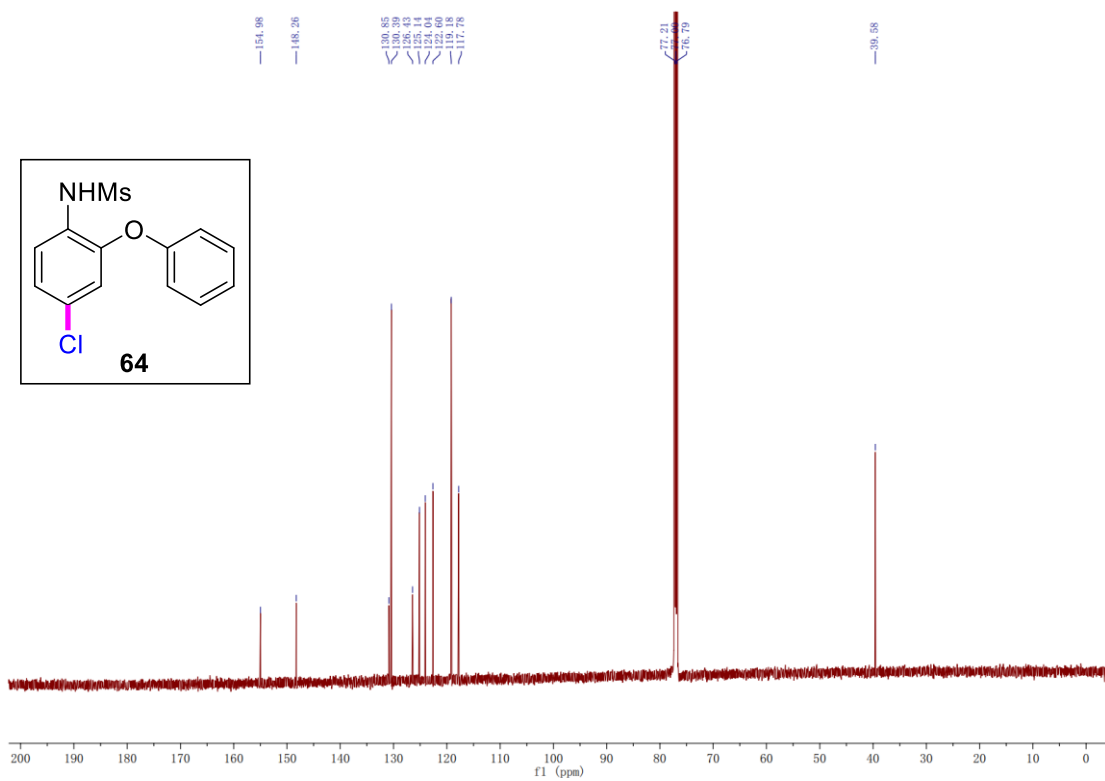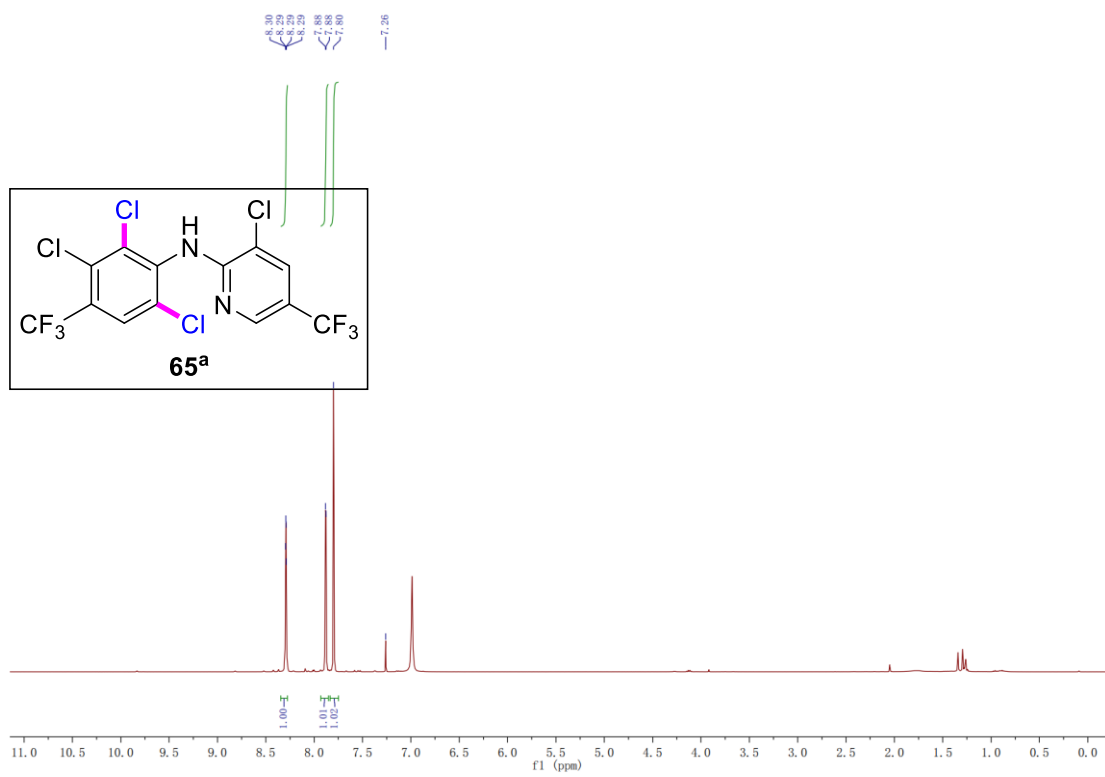

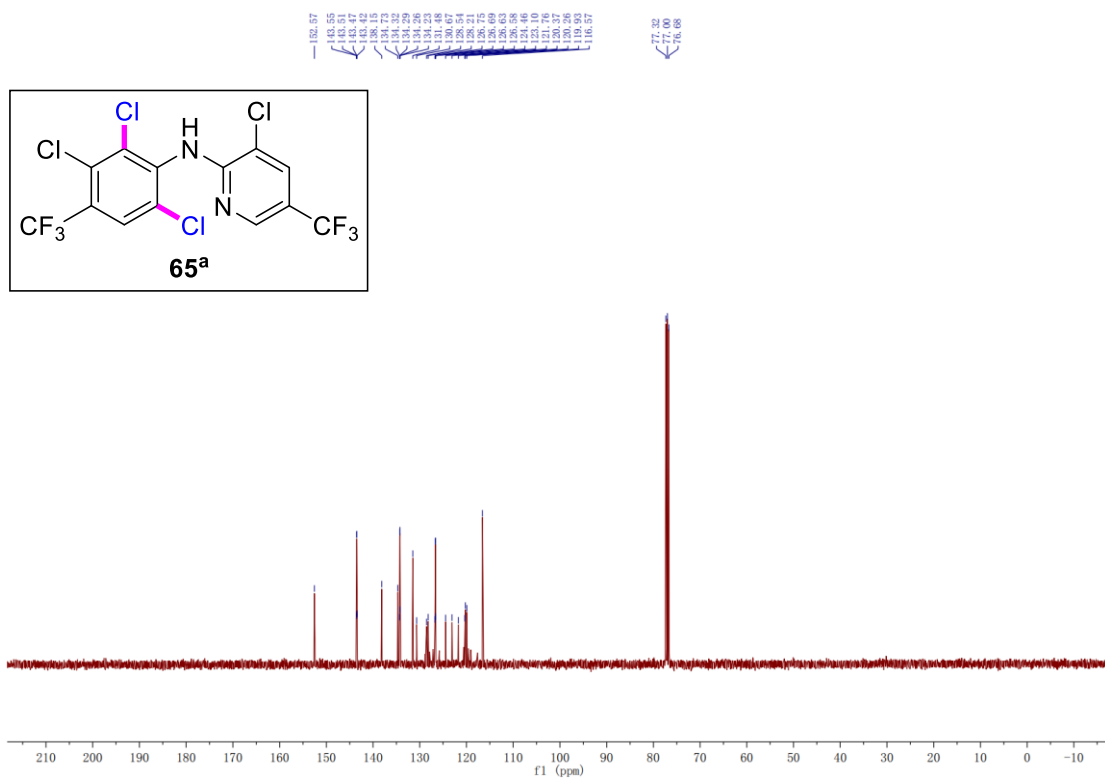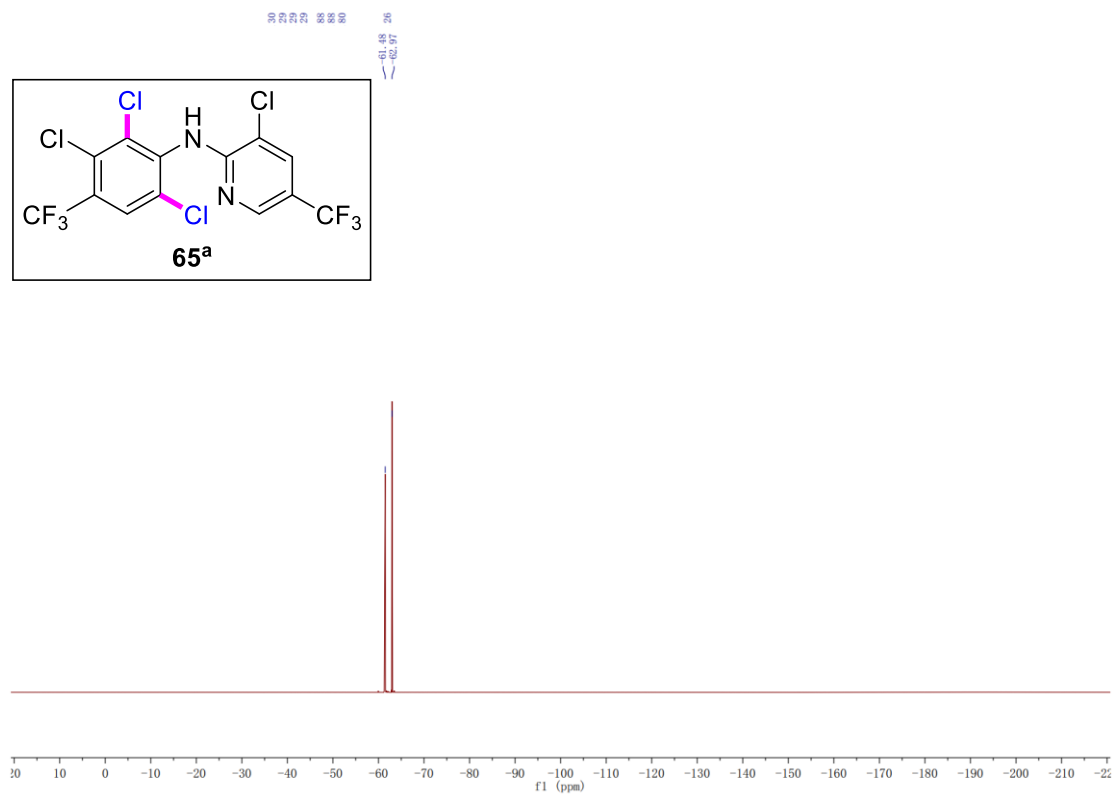



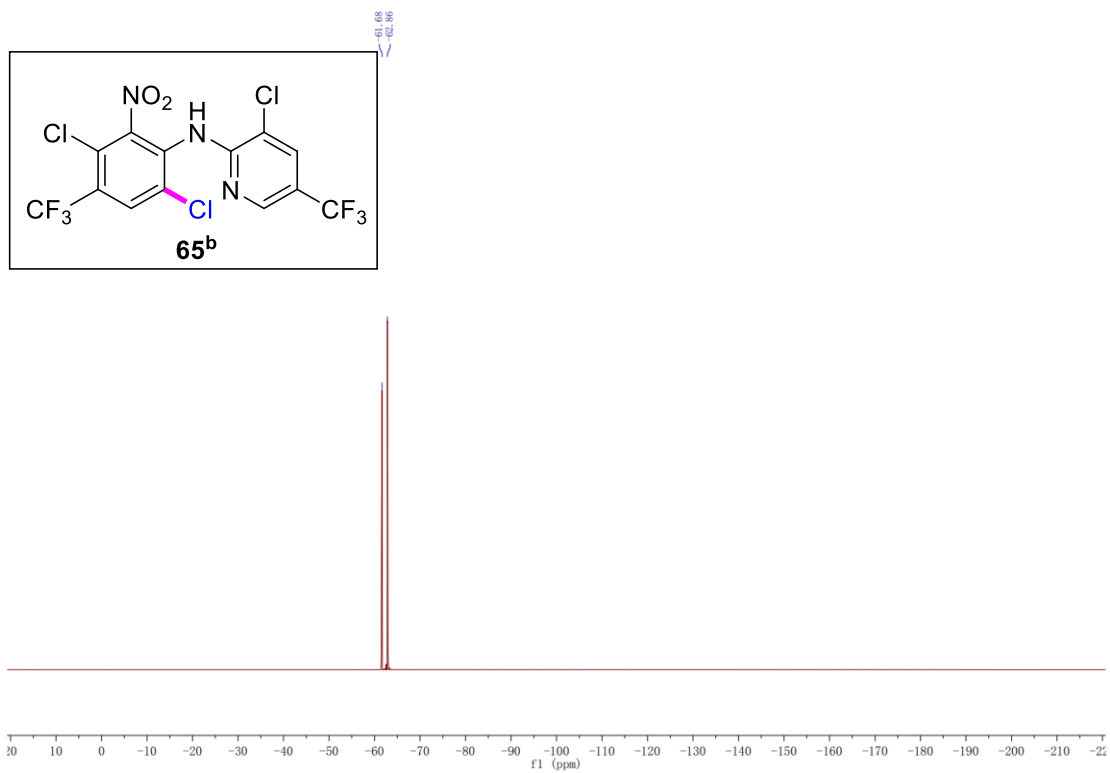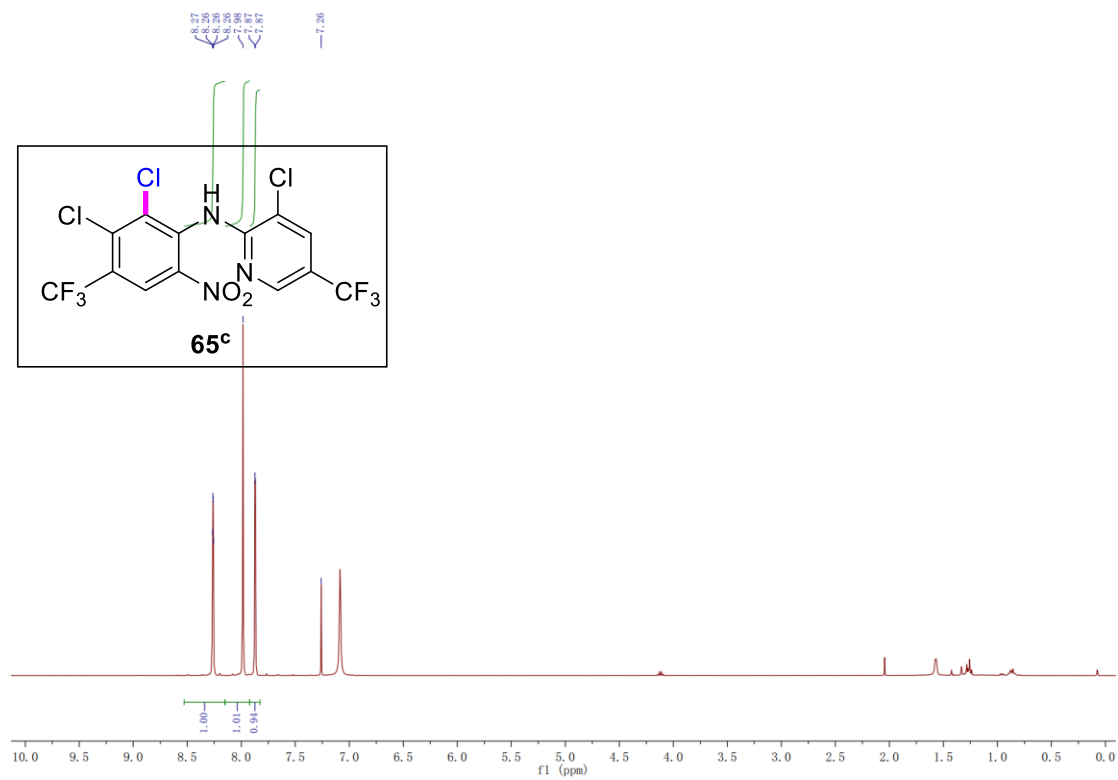

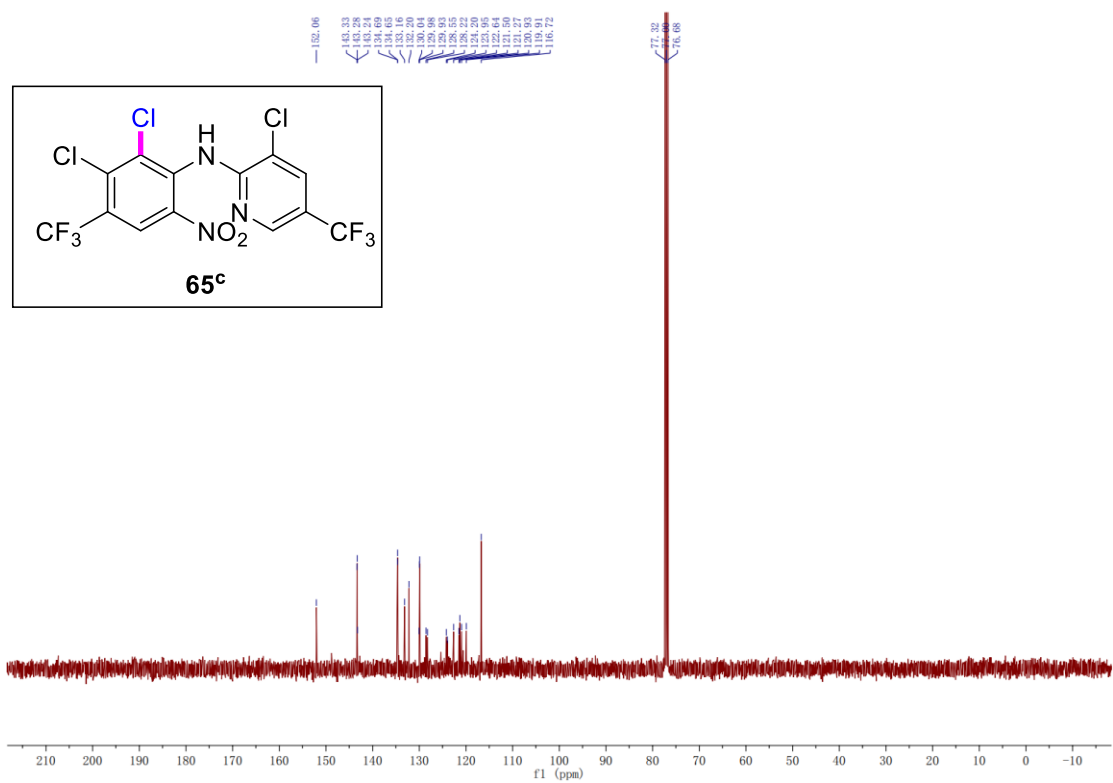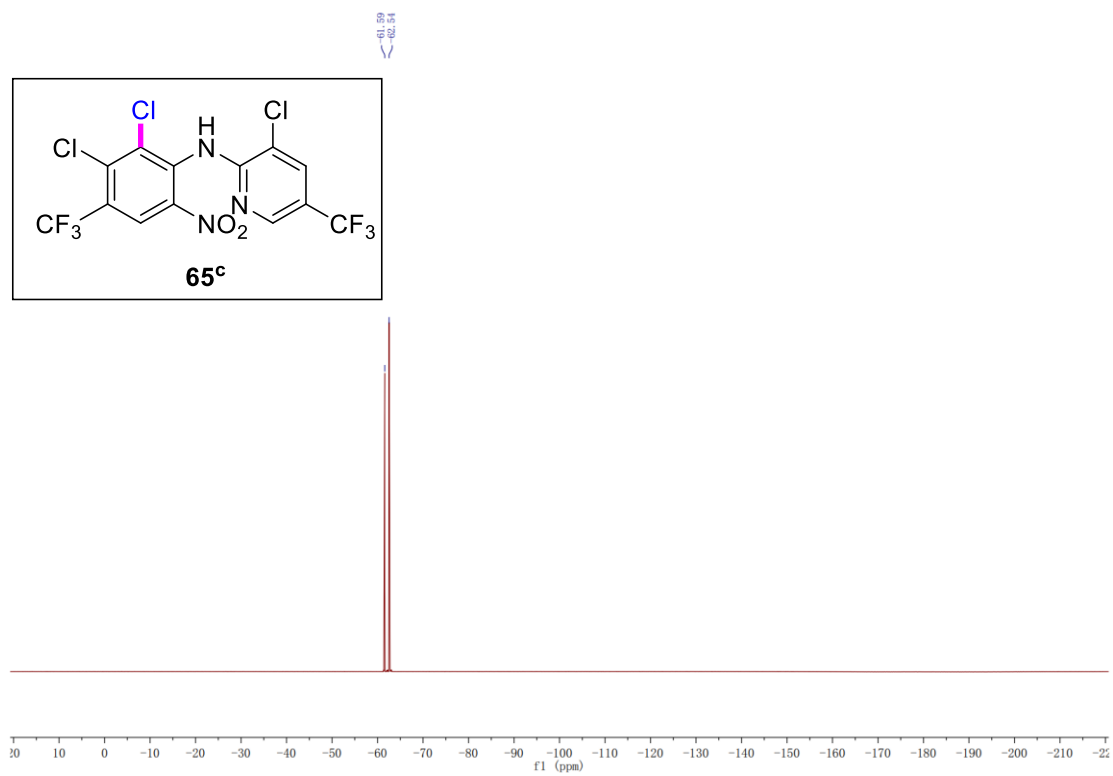

Supplement: d4gc04210g1.pdf [file d4gc04210g1.pdf]
